# Supplementary material for: Partial-Body Irradiation in Patients with Prostate Cancer Treated with IMRT Has Little Effect on the Composition of Serum Proteome
Source: Proteomes. 2015 Jun 30;3(3):117–31. doi: 10.3390/proteomes3030117 (PMC5217376; doi:10.3390/proteomes3030117)
Supplement: Supplementary File 1 [file proteomes-03-00117-s001.xlsx]

## Sheet: Table_S1
Table S1. Components of serum peptidome of prostate cancer patients undergoing radiotherapy
							RT_1+2				RT_1				RT_2
component [m/z - Da]	component SD	sample A	sample B	sample C	sample D	sample E	AΔB p-value	AΔC p-value	AΔD p-value	AΔE p-value	AΔB p-value	AΔC p-value	AΔD p-value	AΔE p-value	AΔB p-value	AΔC p-value	AΔD p-value	AΔE p-value
2058.02	3.67453	96134.4	99768.6	96306.9	102176	97291.2	0.560311	0.934635	0.124943	0.806496	0.419808	0.72285	0.616018	0.668443	0.262848	0.892288	0.126152	0.440256
2072.41	3.36241	70768	73717.4	71985.4	74603.2	72353.5	0.388157	0.517611	0.161127	0.645279	0.389461	0.551849	0.348428	0.769235	0.056592	0.608858	0.0292619	0.272424
2080.85	4.22008	509986	534237	516321	531863	515988	0.310671	0.757881	0.236728	0.917775	0.827942	0.213806	0.831392	0.687459	0.194529	0.455584	0.287526	0.0882559
2170.9	3.44563	102092	108185	107815	107664	109409	0.210268	0.123741	0.192639	0.0965558	0.596891	0.0306469	0.558533	0.0731266	0.246938	0.852375	0.365545	0.49925
2214.01	3.50168	222972	229864	220985	228734	224888	0.447548	0.840797	0.415688	0.910239	0.496563	0.882722	0.122571	0.215601	0.144743	0.887799	0.021144	0.932011
2280.99	4.90471	117590	123356	122116	127722	121663	0.428876	0.309337	0.0825709	0.657277	0.612375	0.638408	0.698276	0.939647	0.244565	0.124329	0.105911	0.391413
2357.78	4.85774	313363	333935	335555	324071	330161	0.112503	0.0254018	0.477146	0.11552	0.222079	0.00761574	0.539362	0.0502479	0.561018	0.989038	0.633997	0.0912125
2378.96	2.85992	102197	106802	111849	102524	112066	0.411082	0.0225628	0.907388	0.0315427	0.389206	0.00205604	0.702503	0.00125937	0.680291	0.569274	0.657662	0.837902
2385.72	3.82259	121382	129569	129945	123585	130772	0.113648	0.0463604	0.864321	0.0391805	0.134355	0.000371725	0.342393	0.00146527	0.211432	0.789384	0.84299	0.295453
2392.66	2.30193	33946.7	36194.6	35752.1	36229.9	36792.9	0.0950043	0.367449	0.0977142	0.0285042	0.398651	0.0421539	0.044342	0.0529368	0.102513	0.729732	0.590285	0.465673
2428.44	4.2794	630535	652756	664196	662674	655955	0.443881	0.0585382	0.0460939	0.17705	0.405271	0.00598064	0.288414	0.0952306	0.954583	0.710337	0.565057	0.528288
2476.13	2.48838	18469.5	18668.6	18856.7	20172.7	19007.2	0.954992	0.727183	0.113383	0.516187	0.917634	0.444118	0.382261	0.845072	0.604092	0.661251	0.486926	0.971328
2518.01	4.30372	96564	98237.4	95784.5	101668	97138.7	0.677063	0.322795	0.456887	0.700295	0.413994	0.51032	0.406012	0.0748514	0.824095	0.817326	0.122263	0.779134
2541.59	2.86196	121175	124721	121487	122884	118762	0.381645	0.863111	0.48675	0.228424	0.636563	0.948514	0.918774	0.142372	0.0877872	0.842431	0.32894	0.0380012
2573.32	3.03017	13680.9	15573.4	15602.2	15143.8	14970.2	0.281467	0.00258966	0.0213986	0.307621	0.973971	0.358905	0.591564	0.766426	0.136119	0.012763	0.0310662	0.598845
2588.19	4.67458	32481.4	33005.2	34727	33900.3	34524.3	0.634648	0.0527704	0.144034	0.244864	0.926533	0.299315	0.339607	0.101423	0.228922	0.049626	0.327215	0.860882
2599.01	3.6162	66725.8	60674.2	63212	63159.7	61550.3	0.855261	0.314899	0.635744	0.615816	0.544281	0.0411923	0.189085	0.0588781	0.745038	0.995066	0.280063	0.401956
2616.6	2.45602	8528.36	8781.74	9061.02	8498.29	9147.76	0.729876	0.326606	0.687661	0.279626	0.739621	0.376374	0.449008	0.160215	0.53561	0.463958	0.378376	0.644944
2634.73	5.42418	161676	165387	167940	162547	165307	0.501118	0.107913	0.889892	0.427469	0.45281	0.28384	0.366455	0.655589	0.0918066	0.178417	0.4084	0.175908
2642.3	3.48903	384928	398648	391373	382745	381869	0.423747	0.817852	0.639019	0.610428	0.314713	0.0279866	0.408807	0.516056	0.645036	0.0495665	0.110153	0.0266284
2670.57	3.61332	155718	158177	153838	154450	150977	0.730391	0.780008	0.95487	0.294939	0.856786	0.927547	0.595814	0.156786	0.633791	0.893915	0.306998	0.495688
2683.57	5.0272	43082.2	45765.2	46842.8	45578.6	45207.6	0.116046	0.006043	0.0953007	0.303167	0.489156	0.0838294	0.282463	0.464097	0.258026	0.0293789	0.401311	0.39037
2699.63	4.5378	101703	104067	105268	105738	104296	0.597222	0.280804	0.629053	0.701069	0.378869	0.817998	0.915429	0.811764	0.25309	0.337107	0.37141	0.252258
2710.59	2.97501	49174.7	50782.2	52483.4	51813.8	50877.4	0.702016	0.133787	0.205968	0.658998	0.966559	0.175668	0.491203	0.738178	0.52299	0.705042	0.579429	0.54484
2755.96	3.63478	2.60824e+06	3.67746e+06	3.36006e+06	3.02621e+06	3.15797e+06	0.313781	0.107583	0.0259308	0.977233	0.546093	0.243427	0.024363	0.676243	0.667414	0.543337	0.257554	0.423404
2790.87	5.23898	1.02456e+06	1.07605e+06	1.42928e+06	1.16336e+06	1.07075e+06	0.353245	4.94256e-06	0.00560135	0.651378	0.508789	0.0319278	0.184053	0.701605	0.949107	0.000530822	0.467234	0.728012
2810.16	2.71432	11112.5	11336.9	11965.3	12026.5	11797.9	0.66256	0.0310921	0.0260687	0.322669	0.89221	0.3992	0.783681	0.910003	0.568541	0.0328611	0.0194494	0.493694
2825.18	5.61985	178082	188405	186346	183557	179910	0.334298	0.0792754	0.246247	0.782651	0.725772	0.641339	0.853363	0.638886	0.394397	0.181192	0.168051	0.0307884
2853.02	2.87291	15861.2	17176.3	17783.1	16677.3	17312.2	0.001884	0.0120476	0.307129	0.0063669	0.707132	0.206105	0.750389	0.785048	0.0263687	0.213491	0.161529	0.967605
2869.85	4.35633	331304	354414	342900	338145	335704	0.046153	0.300036	0.488082	0.627664	0.347867	0.0125722	0.754218	0.861642	0.294539	0.338986	0.936527	0.0524831
2900.68	5.25821	123607	131036	133527	124448	132679	0.241514	0.0155425	0.879409	0.107579	0.0560899	0.000629431	0.069503	0.000190989	0.642206	0.55523	0.288437	0.235175
2937.61	5.53959	7.83009e+06	9.32813e+06	9.21867e+06	8.75536e+06	8.8745e+06	0.115956	0.00406283	0.0236661	0.182938	0.0676717	0.0203847	0.0483801	0.130765	0.707286	0.0497687	0.24767	0.746332
3045.87	4.272	199745	205543	203282	196661	197852	0.631796	0.777305	0.433993	0.363561	0.867609	0.108429	0.615581	0.785929	0.824343	0.237186	0.189081	0.0408824
3075.5	3.67621	76017.9	81013.7	82638.9	82737.7	78416.2	0.49084	0.0530552	0.0797025	0.558531	0.514036	0.94797	0.545272	0.989695	0.253456	0.0306125	0.0784309	0.227935
3087.61	4.88351	2.24772e+06	2.52128e+06	2.4189e+06	2.38226e+06	2.28379e+06	0.587418	0.139755	0.222023	0.986718	0.94797	0.264982	0.163058	0.893831	0.585179	0.628459	0.688249	0.196825
3102.96	5.85665	82182.4	94754.1	92359	88330.7	89846.1	0.130646	0.0250132	0.131568	0.226095	0.551531	0.137653	0.352419	0.25103	0.179176	0.285306	0.39696	0.117555
3112.76	3.59013	77167.9	83529.4	79450.8	79218.8	79236.3	0.318267	0.433868	0.645675	0.546382	0.501608	0.150585	0.695384	0.268324	0.225797	0.831394	0.629755	0.0093777
3144.69	5.60401	309661	334100	341658	322636	332317	0.0499921	0.00558724	0.105065	0.101869	0.076203	0.0707212	0.477125	0.0511839	0.120581	0.0322479	0.468153	0.626363
3159.09	4.54357	745319	768250	778151	748094	767296	0.215952	0.0194668	0.300452	0.472036	0.075795	0.0113819	0.321041	0.0175904	0.747977	0.538214	0.927199	0.152844
3195	5.52136	2.49294e+06	2.55993e+06	2.76516e+06	2.62539e+06	2.81859e+06	0.600284	0.140379	0.667927	0.14954	0.349903	0.145909	0.267273	0.139769	0.915927	0.247076	0.727818	0.508086
3208.48	5.28238	133039	141625	142781	141015	144175	0.393129	0.389278	0.248912	0.199905	0.317481	0.113541	0.135504	0.12015	0.742118	0.941367	0.718012	0.233016
3218.56	3.01004	50746.3	51668.3	49340	52624.8	50170.8	0.614491	0.255352	0.323778	0.717153	0.946181	0.51238	0.525466	0.409014	0.504433	0.396368	0.323047	0.575336
3246.95	4.60931	89826	90856.2	102657	93099.5	95369.8	0.420728	0.00344033	0.408659	0.503968	0.696824	0.289923	0.590323	0.884433	0.186812	0.00415068	0.297919	0.556649
3265.75	5.37038	5.92718e+06	6.1418e+06	6.6684e+06	6.17726e+06	6.59501e+06	0.412729	0.096859	0.8096	0.199072	0.382444	0.117847	0.356659	0.186279	0.82536	0.512824	0.665005	0.733174
3285.65	6.60221	1.09525e+06	1.17547e+06	1.22578e+06	1.15151e+06	1.18987e+06	0.0389611	0.00117437	0.0805137	0.087616	0.0881215	0.0082873	0.0944844	0.0712049	0.610294	0.299649	0.849884	0.863459
3317.35	5.29796	445376	421691	423258	480664	420828	0.555824	0.562076	0.0868131	0.977233	0.558497	0.335464	0.400808	0.464389	0.129959	0.679258	0.0524375	0.707263
3351.24	3.35292	26892.6	25905.9	25670.6	25427.6	25905	0.42723	0.281051	0.100548	0.214165	0.501779	0.0842901	0.299176	0.201205	0.927237	0.802941	0.213559	0.879124
3399.31	7.07842	346834	359565	367695	358971	372337	0.176515	0.0354119	0.29798	0.0412178	0.917843	0.134665	0.498173	0.0983174	0.179176	0.496503	0.994728	0.658081
3449.75	5.26958	1.68818e+06	1.774e+06	1.80635e+06	1.72665e+06	1.71926e+06	0.770575	0.0889695	0.47413	0.612473	0.630326	0.167056	0.352419	0.989695	0.984462	0.274686	0.841187	0.291246
3473.43	4.59421	104219	105219	106745	107648	107299	0.306031	0.0628695	0.787814	0.597535	0.576749	0.196447	0.300226	0.660663	0.750325	0.379533	0.408794	0.946764
3509.23	5.39104	174044	172572	173805	177471	172898	0.749539	0.849279	0.50866	0.361058	0.188943	0.943565	0.998945	0.0504325	0.44633	0.993939	0.507955	0.736858
3520.04	4.03399	76202.1	75947.2	77504.9	78290.3	76846.7	0.815187	0.370369	0.510347	0.887735	0.665125	0.206238	0.321053	0.704599	0.881223	0.485965	0.606824	0.71823
3590.41	5.46538	61656.1	60104.4	61198.1	60697.3	60190.5	0.198752	0.754413	0.530956	0.115121	0.065051	0.471642	0.0605182	0.0846021	0.523683	0.575645	0.592132	0.645969
3616.32	4.61255	8722.47	9457.52	9334.45	8763.98	9080.85	0.962007	0.558112	0.966493	0.578199	0.120538	0.9156	0.914509	0.811238	0.579868	0.632234	0.465293	0.621739
3689.43	6.87388	630651	640353	651663	637493	641412	0.50368	0.108794	0.661439	0.357393	0.841722	0.0694211	0.63075	0.90707	0.661989	0.804303	0.824058	0.555293
3720.58	5.16187	36103.8	36873.5	38455.5	37669.5	37885.7	0.908412	0.0517557	0.2352	0.289757	0.781518	0.026904	0.172573	0.357645	0.998683	0.826169	0.517586	0.723081
3728.32	2.16177	9155.87	9353.73	9489.05	9533.59	9734.57	0.715097	0.462454	0.488486	0.254632	0.953922	0.125513	0.225325	0.174174	0.860833	0.443854	0.323038	0.703833
3750.36	5.27796	9583.11	9451.46	10128.7	10197.8	9089.86	0.358086	0.779474	0.313812	0.155679	0.256864	0.528082	0.683381	0.095698	0.603387	0.392258	0.294972	0.665107
3776.82	4.40075	56413.7	61111.9	56788.5	58609	55390.2	0.18805	0.318267	0.523341	0.810181	0.459374	0.139828	0.787788	0.288912	0.0636973	0.827631	0.541747	0.0559444
3822.48	5.7494	780108	810260	809558	776788	786569	0.191506	0.167898	0.735416	0.993706	0.380196	0.0399705	0.639033	0.358565	0.652591	0.718441	0.322052	0.0573855
3846.45	7.14125	773950	826201	834006	797955	808257	0.0448641	0.00831213	0.411382	0.241209	0.125838	0.00118484	0.624541	0.145294	0.197363	0.834042	0.848712	0.180193
3894.16	5.93768	110748	110721	132532	120584	109242	0.629688	0.184951	0.805958	0.826814	0.970933	0.734585	0.452983	0.297186	0.863496	0.392258	0.946156	0.799656
3910.05	7.50483	301149	317913	345459	329305	304573	0.0596324	0.00388707	0.209815	0.61749	0.288953	0.0689329	0.316407	0.996565	0.209005	0.169359	0.729631	0.0956841
3955.91	5.37275	5.85138e+06	6.0672e+06	6.43335e+06	5.65629e+06	6.35205e+06	0.779474	0.543423	0.487294	0.474101	0.562486	0.0952319	0.432993	0.189163	0.90919	0.861706	0.0744726	0.682955
4020.4	4.48583	188028	200142	188564	185917	183459	0.122301	0.673308	0.717563	0.222668	0.606812	0.757696	0.383247	0.0744056	0.260057	0.665892	0.745906	0.0354769
4059.15	6.27898	1.2232e+06	1.30749e+06	1.30352e+06	1.03073e+06	1.36445e+06	0.504095	0.294111	0.107611	0.154987	0.227336	0.132884	0.681106	0.00874638	0.564071	0.870482	0.101462	0.893429
4096.65	5.76857	2.51461e+06	2.5689e+06	2.95089e+06	2.58e+06	2.7562e+06	0.600156	0.0115048	0.839423	0.204957	0.832041	0.0785617	0.839129	0.227479	0.737606	0.130912	0.854362	0.242999
4127.87	6.13341	115474	115673	121892	115718	121073	0.976166	0.0521906	0.673067	0.110337	0.628763	0.112661	0.781518	0.0215941	0.813924	0.188725	0.573767	0.543402
4157.07	4.51967	660643	575346	609586	613293	641859	0.0438209	0.897386	0.970935	0.463882	0.168034	0.601633	0.568002	0.695232	0.582438	0.320071	0.239044	0.0175276
4169.54	7.62502	1.61366e+06	1.58963e+06	1.66031e+06	1.56131e+06	1.68509e+06	0.598421	0.0394033	0.227408	0.0288508	0.715464	0.0542204	0.131726	0.206482	0.494583	0.332859	0.847755	0.15191
4214.6	5.47579	7.52303e+07	7.90564e+07	8.65734e+07	7.22048e+07	8.82489e+07	0.497802	0.0330049	0.463017	0.0263172	0.291395	0.0462494	0.71138	0.0204644	0.908083	0.223906	0.639054	0.389317
4220.51	8.03324	2.9916e+07	3.2652e+07	3.477e+07	2.89982e+07	3.5234e+07	0.253399	0.0247587	0.534619	0.0155877	0.14818	0.0194871	0.782255	0.00578475	0.701189	0.370895	0.579888	0.602038
4272.51	4.05003	204313	212744	224404	193924	228981	0.601471	0.135902	0.39059	0.0276535	0.229585	0.0418915	0.676656	0.00959146	0.791389	0.337632	0.403973	0.682955
4282.05	8.58368	236859	223899	228761	228980	231564	0.130646	0.0609228	0.642465	0.0234283	0.125256	0.0154966	0.902617	0.00302912	0.323569	0.166969	0.501985	0.862849
4294.08	5.58964	493344	444447	445518	492020	446245	0.257299	0.08658	0.448399	0.453787	0.209039	0.0186104	0.477911	0.0672991	0.538214	0.80133	0.83324	0.222568
4302	4.09292	334149	337284	333425	341752	327079	0.326219	0.160119	0.209815	0.858439	0.0749792	0.0136024	0.148794	0.0923175	0.922902	0.601247	0.971479	0.040653
4347.64	4.13515	97762	97309.6	93010.9	92476.8	95777.9	0.705728	0.101563	0.0610015	0.470942	0.346695	0.325648	0.0341673	0.295073	0.409239	0.275408	0.672534	0.36083
4366.88	6.55082	69910.2	69282.9	72313.3	66098.8	71913.4	0.489364	0.295953	0.0414512	0.504018	0.303896	0.170565	0.084329	0.126164	0.98372	0.362967	0.332175	0.936829
4397.89	5.92501	215276	213248	221649	195832	222093	0.797002	0.303846	0.0138833	0.459406	0.98624	0.309073	0.13819	0.349598	0.947567	0.239649	0.0967682	0.625844
4465.04	4.93617	107423	105180	103630	110315	106417	0.517181	0.351382	0.464355	0.740526	0.0254881	0.0848677	0.140239	0.083002	0.118387	0.245405	0.0474424	0.608918
4476.44	5.35891	392474	390862	392507	403272	403729	0.378388	0.552033	0.445827	0.296448	0.243434	0.808897	0.314603	0.758412	0.746029	0.571863	0.0431403	0.21058
4530.89	8.25366	65752.4	63311.2	64006.4	68328.5	62243.8	0.728297	0.838883	0.554393	0.224277	0.217311	0.827318	0.405396	0.0676871	0.567207	0.982772	0.218816	0.552575
4549.95	4.67068	67005.7	66024.4	63419.4	66161.5	64755.2	0.327605	0.010068	0.292837	0.240387	0.0727241	0.214752	0.372657	0.0527186	0.365268	0.0148931	0.197637	0.718402
4575.91	6.71322	163625	156677	153683	157127	152900	0.177112	0.0520497	0.257503	0.0676906	0.0503644	0.0605542	0.0743906	0.00666888	0.253722	0.221974	0.711716	0.678165
4595.62	6.50969	93809.8	94163.4	89509.2	90095.7	90669.1	0.851616	0.0745161	0.0401375	0.1525	0.824785	0.320063	0.0244986	0.0504438	0.913098	0.0496987	0.319752	0.263334
4631.9	5.12215	63524.4	63428.9	63523.4	60748.2	63459.1	0.624302	0.951278	0.113594	0.740455	0.10812	0.830764	0.0938577	0.38607	0.282369	0.512301	0.433201	0.488835
4648.29	5.69471	274446	278362	270990	270375	271461	0.193565	0.989803	0.982184	0.563338	0.373937	0.0342279	0.348211	0.0678832	0.933356	0.0498356	0.152192	0.0684791
4674.52	3.99156	8832.47	9116.88	8706.54	9122.78	8476.24	0.6513	0.822934	0.105065	0.366757	0.776758	0.974602	0.209047	0.108224	0.729263	0.848563	0.625384	0.131662
4689.22	7.80329	106996	104995	103551	103231	101727	0.77336	0.514465	0.69406	0.18082	0.173397	0.225391	0.346171	0.00612773	0.932949	0.991281	0.796531	0.865681
4714.76	7.67004	1.11191e+06	1.06401e+06	1.03928e+06	1.04728e+06	1.04332e+06	0.14674	0.00480541	0.199034	0.352445	0.216466	0.145751	0.0630282	0.052185	0.60123	0.0498218	0.948649	0.471721
4735.25	6.45944	109574	107466	102563	102063	103447	0.644618	0.0987424	0.168726	0.97913	0.956648	0.922024	0.281599	0.547225	0.394764	0.262886	0.258578	0.236431
4777.99	5.17287	72908.6	77670.2	77139.3	76647	73195.9	0.221164	0.075387	0.140018	0.977887	0.882012	0.253564	0.61529	0.226877	0.307775	0.418899	0.564146	0.0359353
4796.96	9.05176	733749	734799	750814	725893	729325	0.680006	0.253415	0.922634	0.988615	0.260302	0.66283	0.990983	0.706715	0.983756	0.63949	0.818003	0.220271
4824.05	9.28375	280222	280619	277993	270445	273340	0.913003	0.995723	0.0614911	0.480262	0.758645	0.809844	0.239546	0.198194	0.643353	0.717415	0.207916	0.371477
4857.3	5.68464	128872	126769	127028	126016	131867	0.382911	0.886094	0.723323	0.209238	0.0339177	0.466223	0.209693	0.603746	0.996911	0.39581	0.195619	0.159224
4895.14	5.62836	94674.5	93304.6	95152.7	92402.6	87553.6	0.69368	0.329666	0.784199	0.042746	0.996372	0.494664	0.292825	0.0184028	0.803314	0.478681	0.878439	0.132025
4944.47	7.92711	51818.1	50559.4	51109.5	49704.1	51628.1	0.636617	0.327365	0.366025	0.213583	0.0271274	0.182988	0.223319	0.00896985	0.685026	0.52299	0.794353	0.85738
4968.66	7.7648	293739	255359	246039	235152	273653	0.348446	0.039626	0.00269437	0.769895	0.883268	0.438385	0.524612	0.590481	0.115125	0.0495245	0.000962606	0.645005
4991.99	6.26134	119228	122496	124328	113530	119558	0.678048	0.499656	0.173351	0.594237	0.577713	0.123149	0.966705	0.435249	0.492082	0.535429	0.0154287	0.631001
5072.87	8.2123	1.71903e+07	1.77396e+07	1.83584e+07	1.73242e+07	1.8636e+07	0.889822	0.242775	0.827408	0.149888	0.65514	0.591288	0.825683	0.0974902	0.439317	0.0497741	0.375633	0.995583
5143.88	7.23212	40796.1	39179.7	39110.5	43390	39658.5	0.205782	0.610017	0.137692	0.381487	0.393485	0.432822	0.111693	0.766426	0.568251	0.546608	0.567043	0.475214
5198.3	8.81572	410281	399563	467772	438093	431411	0.806341	0.1225	0.594433	0.935556	0.183196	0.895866	0.256864	0.0923175	0.405238	0.0386035	0.154673	0.301858
5232.85	7.16852	54316.8	57072.4	61351.5	59609.9	57439.9	0.194948	0.00750857	0.107611	0.468246	0.814827	0.115414	0.738047	0.846387	0.14213	0.0487894	0.107806	0.812609
5287.13	9.47844	356608	362611	358983	356303	374577	0.646714	0.696151	0.640782	0.516187	0.568424	0.45444	0.260302	0.243338	0.289881	0.140235	0.0729005	0.711727
5346.12	7.64807	410539	451156	494725	419345	483585	0.373216	0.0612437	0.730567	0.12741	0.229145	0.194639	0.315706	0.0503043	0.917099	0.228615	0.590622	0.836908
5411.87	8.10045	37204.4	36851.8	37300.6	36938.2	40448.4	0.931563	0.881942	0.957101	0.30875	0.311588	0.172168	0.65557	0.0543065	0.567443	0.695806	0.613896	0.435205
5435.13	6.50137	48356.7	50600	51644.8	50839	48823.8	0.274469	0.151362	0.210928	0.373773	0.671993	0.165889	0.531724	0.435847	0.609498	0.911681	0.960354	0.276566
5495.68	9.20874	118436	115295	116749	109620	117897	0.691262	0.539297	0.227408	0.929883	0.629301	0.731838	0.0609924	0.989695	0.45554	0.258231	0.210799	0.538621
5524.25	6.15941	53332.5	52010.9	52731.4	51800	51200.9	0.926786	0.0690203	0.121645	0.235111	0.214223	0.136171	0.0573543	0.0526375	0.678421	0.276683	0.52762	0.692575
5564.5	7.12137	143680	153488	155053	150098	141777	0.0548712	0.00608485	0.115035	0.515572	0.0389366	0.0137653	0.300211	0.886513	0.683457	0.336879	0.731762	0.000943325
5641.55	8.96045	1.05e+06	1.03695e+06	1.12046e+06	1.08895e+06	1.03649e+06	0.512752	0.847974	0.698991	0.67132	0.997314	0.573545	0.414667	0.897428	0.668801	0.78218	0.424584	0.958657
5715.06	5.64653	155136	153692	158853	160256	155120	0.429505	0.635645	0.429691	0.712758	0.382911	0.415137	0.729139	0.661084	0.968241	0.598512	0.180803	0.568741
5738.97	8.97236	119904	119447	131880	131828	122819	0.582626	0.999073	0.741198	0.97923	0.827417	0.671443	0.513157	0.775454	0.996911	0.724631	0.35053	0.961178
5761.32	8.71428	7.60487e+06	7.8267e+06	8.41308e+06	8.08184e+06	8.08566e+06	0.781149	0.95275	0.734105	0.626531	0.786284	0.352419	0.800369	0.376416	0.806544	0.972207	0.464216	0.925306
5781.79	5.21855	167947	186498	190645	177205	187727	0.811743	0.60839	0.607666	0.122962	0.38723	0.0267691	0.191515	0.050249	0.979632	0.695806	0.667804	0.85407
5816.1	9.40821	159632	155511	187462	182187	200217	0.282416	0.634648	0.20306	0.446652	0.293563	0.323639	0.311787	0.614474	0.967911	0.400883	0.149287	0.135376
5875.64	8.83256	249776	247477	291382	256501	274975	0.821722	0.0733892	0.767988	0.184521	0.795013	0.301357	0.712009	0.259946	0.761478	0.294138	0.721199	0.246386
5914.63	8.54615	9.9954e+06	1.0768e+07	1.24184e+07	1.01665e+07	1.17099e+07	0.484426	0.0940877	0.952202	0.190879	0.257766	0.0878733	0.394268	0.0617335	0.976486	0.253456	0.33041	0.723838
5994.59	4.55707	27669.5	26779.6	26671.8	27447.3	26826.1	0.129539	0.162162	0.828704	0.277845	0.820972	0.436691	0.813986	0.957334	0.184549	0.950521	0.228975	0.61972
6010.46	9.21177	51533.3	52171.9	51492.5	52493	51181.8	0.899962	0.646285	0.883198	0.349988	0.660249	0.68549	0.934988	0.996565	0.994269	0.695806	0.851886	0.148284
6037	6.51555	22131.1	23047.5	22627.9	22983.2	22652.3	0.512594	0.495921	0.224798	0.699745	0.90133	0.138133	0.545011	0.4117	0.763179	0.332837	0.57306	0.164633
6083.39	8.52534	62575.1	63380.7	63347.5	61925	63549.1	0.367892	0.403512	0.974684	0.945261	0.736705	0.412213	0.859834	0.598562	0.304957	0.620743	0.732121	0.9426
6197.89	11.4669	45112.3	46274.5	44028.6	45699.5	45615.7	0.373746	0.246241	0.407363	0.648798	0.212017	0.321403	0.528631	0.558589	0.0444117	0.657325	0.0553059	0.364341
6281.8	12.4798	100349	100493	95478.8	96120	96594.9	0.665706	0.114517	0.194842	0.193948	0.712205	0.117311	0.0330378	0.0504431	0.72863	0.621123	0.893417	0.997393
6310.96	11.597	38909.4	39635.4	38748.4	39684.8	39469.8	0.314841	0.67554	0.233403	0.704062	0.472329	0.84479	0.34539	0.763215	0.689284	0.582423	0.38435	0.731714
6334.65	7.60951	28050	29174.8	28282.7	30868.3	28944.3	0.462067	0.850621	0.00247014	0.39444	0.83841	0.838389	0.0286103	0.433043	0.202366	0.977668	0.0306126	0.201417
6404.54	12.0898	1.09011e+06	1.07133e+06	1.1033e+06	1.14145e+06	1.09944e+06	0.467745	0.730279	0.376145	0.874435	0.410016	0.797071	0.200312	0.521223	0.742705	0.463067	0.465893	0.332431
6440.38	7.8582	4.76626e+07	4.65178e+07	4.72652e+07	4.90914e+07	4.80188e+07	0.29879	0.45226	0.301505	0.342681	0.339001	0.466196	0.749984	0.887026	0.489307	0.720291	0.203001	0.231409
6538.22	9.2704	307585	301865	306925	311428	308655	0.358965	0.650134	0.874918	0.955724	0.876581	0.629937	0.825109	0.755243	0.377793	0.206745	0.87044	0.306008
6639.12	8.86277	3.97622e+08	3.86148e+08	4.01449e+08	4.07645e+08	4.00916e+08	0.230603	0.878237	0.396565	0.691031	0.247445	0.8729	0.979075	0.607288	0.279515	0.834466	0.448589	0.16053
6813.12	14.7369	455699	442132	460808	457139	463860	0.42954	0.907733	0.879235	0.533104	0.814878	0.357455	0.710525	0.667836	0.389694	0.567692	0.895781	0.0461987
6844.18	8.29325	2.40496e+06	2.31827e+06	2.40928e+06	2.45599e+06	2.40374e+06	0.176714	0.800085	0.537927	0.895318	0.215875	0.879133	0.475164	0.615809	0.209649	0.892799	0.247923	0.0446845
6858.71	10.9096	1.6732e+06	1.67995e+06	1.69258e+06	1.72874e+06	1.69056e+06	0.681358	0.993015	0.387963	0.562351	0.625094	0.294943	0.976455	0.511341	0.895634	0.347279	0.559239	0.565054
6886.64	5.67466	92211	93289.3	89106.8	94486.9	90366.3	0.734453	0.231301	0.54521	0.539199	0.602618	0.462865	0.440863	0.198027	0.529111	0.451038	0.190041	0.824617
6940.03	5.42532	122892	116519	128510	131012	124271	0.0799632	0.980535	0.182837	0.573012	0.118763	0.227336	0.917071	0.233059	0.880433	0.222685	0.0142247	0.263805
6951.83	8.20118	228024	224655	239756	238167	230742	0.274543	0.795565	0.407521	0.706855	0.482985	0.964176	0.860393	0.889554	0.412369	0.427434	0.327822	0.663872
6967.46	12.1638	107719	109579	114205	112857	111087	0.765522	0.626391	0.367806	0.271897	0.677402	0.781797	0.553715	0.358907	0.564809	0.333407	0.881678	0.781902
7072.29	10.3735	41647.3	42978.5	43327.8	43427.2	43634.5	0.306726	0.116291	0.246276	0.0524065	0.774532	0.0701608	0.691221	0.111328	0.396086	0.6618	0.167988	0.783409
7160.13	13.7594	482117	526550	512323	551279	479413	0.646285	0.117582	0.101582	0.760821	0.647817	0.378337	0.189085	0.549566	0.929053	0.263239	0.362967	0.108642
7192.42	13.2203	41372.2	45778.7	46019.5	46412.2	42883.4	0.273245	0.0423827	0.125078	0.542653	0.922024	0.373937	0.215021	0.391601	0.24081	0.0961551	0.462381	0.0576436
7276.85	10.2732	36588.5	36182.3	36977	36906.8	36766.9	0.65633	0.308233	0.364842	0.755392	0.201164	0.732207	0.885606	0.833648	0.127231	0.333614	0.268939	0.869605
7304.93	11.2584	51779.2	54447	53699.9	52919.4	52854.3	0.0335272	0.193709	0.330098	0.362	0.546911	0.416367	0.776628	0.392191	0.0179329	0.378966	0.0712098	0.0685519
7366.93	12.5489	50237.8	51721.7	51377.1	52031.1	50098.6	0.382257	0.362721	0.213341	0.770162	0.693662	0.339892	0.973938	0.313356	0.174324	0.823134	0.580817	0.0109166
7454.89	13.6045	29364.6	28046	27651.4	28891.2	27992.1	0.24201	0.128881	0.742975	0.213583	0.137842	0.151537	0.450509	0.0525094	0.908172	0.395279	0.506737	0.975088
7480.5	9.48117	55924.6	56547.2	56048.9	54149.9	55084.1	0.737042	0.914804	0.0820041	0.406082	0.96735	0.742259	0.0898704	0.34773	0.688407	0.78623	0.182537	0.219039
7576.15	15.2577	68399.4	69532.1	66389.7	67481.2	64710.6	0.980535	0.311615	0.462595	0.0268248	0.0823062	0.059396	0.367338	0.128828	0.176683	0.650971	0.753646	0.0126641
7614.12	8.17797	15931.5	15297.3	14777.2	15456.9	14588.5	0.791981	0.347252	0.929758	0.131011	0.762824	0.324828	0.78861	0.365667	0.702333	0.27704	0.915413	0.122498
7664.51	12.2398	82585.1	74242.4	70784.8	77234.2	71940	0.235526	0.004123	0.122781	0.00360441	0.336303	0.00304012	0.307901	0.000544723	0.506363	0.135315	0.326084	0.613556
7682.03	10.9812	145198	137934	133574	136927	133286	0.158641	0.00658166	0.0405784	0.00615086	0.826781	0.0375176	0.413995	0.0190882	0.1747	0.0459149	0.156445	0.832432
7707.89	14.2442	33977.8	33742.4	33161.2	33427.4	33283.3	0.841614	0.0913805	0.192712	0.293559	0.787972	0.493221	0.511364	0.848023	0.530317	0.0230979	0.229274	0.824495
7740.7	9.4764	24854.4	24368	24709.8	23882.4	24642.3	0.420728	0.699288	0.0126715	0.580925	0.281599	0.281599	0.230492	0.538138	0.562491	0.118369	0.0462315	0.435265
7778.85	11.7012	602481	648201	654417	598491	639419	0.192779	0.164064	0.756845	0.491731	0.219547	0.0277715	0.981753	0.0504686	0.898922	0.441016	0.44962	0.218284
7832.5	11.4966	22756.8	24569.5	23941.6	22890.8	23591.9	0.0563386	0.179781	0.971194	0.324725	0.303889	0.00343809	0.624117	0.0165634	0.327171	0.161632	0.390407	0.0502769
8153.91	16.4712	167434	173995	175666	171584	173486	0.0513655	0.0162231	0.351318	0.390622	0.0571833	0.00387022	0.651823	0.00431037	0.885444	0.52804	0.921601	0.131688
8211.97	9.19805	215538	216577	195464	228021	218748	0.902904	0.00221976	0.762607	0.94691	0.914527	0.0023455	0.933067	0.157544	0.878177	0.398416	0.19667	0.0124081
8271.1	12.0315	33899.8	35868.1	34234.9	33890.2	34247.7	0.0765574	0.698286	0.653741	0.834857	0.10056	0.107261	0.873654	0.776023	0.683507	0.125331	0.379336	0.17576
8374.82	13.2678	79085.9	80274.2	82863	83166.5	82376.9	0.794116	0.100819	0.103696	0.104738	0.47687	0.295816	0.863989	0.304675	0.340492	0.241507	0.081016	0.981717
8449.83	14.5895	44753.4	44303.7	45916.9	48697.3	46253.8	0.448041	0.739634	0.0380371	0.309882	0.400808	0.789804	0.472866	0.928879	0.335163	0.20066	0.0133459	0.956861
8534.07	10.2147	22973.9	21768.4	21093.7	22647.1	21980.2	0.228478	0.202471	0.264685	0.169265	0.171755	0.373937	0.573545	0.246834	0.686287	0.179013	0.571784	0.792484
8621.1	11.6275	143646	143829	143084	140147	145355	0.555824	0.999073	0.548111	0.682509	0.236897	0.339892	0.344035	0.161765	0.548485	0.941367	0.140526	0.654411
8696.5	12.7307	3.97244e+06	3.72181e+06	3.44932e+06	3.87148e+06	3.76481e+06	0.243885	0.00155776	0.0579859	0.191687	0.0825165	0.00359032	0.0808777	0.078274	0.782467	0.178278	0.753646	0.939481
8772.1	10.1637	4.78203e+06	4.42313e+06	4.05514e+06	4.18782e+06	4.21658e+06	0.069376	0.00179536	0.0200199	0.0165135	0.379133	0.00729491	0.111689	0.0503452	0.453132	0.0496212	0.10368	0.836578
8778.88	15.3356	5.54184e+06	5.17924e+06	4.73348e+06	4.90426e+06	4.91241e+06	0.0950043	0.000837399	0.0109407	0.0094231	0.497788	0.00929764	0.109868	0.0554955	0.425805	0.0258872	0.0633629	0.563515
8820.79	13.0975	8.08122e+06	7.48382e+06	7.07725e+06	8.19854e+06	7.58448e+06	0.14869	0.00117437	0.113383	0.226095	0.188152	0.0614984	0.311787	0.311681	0.84567	0.0495102	0.512159	0.606746
8880.12	7.0629	105158	95446.2	91971	107567	99460.1	0.122004	0.00239819	0.632395	0.536365	0.193588	0.0162129	0.756584	0.15416	0.332676	0.119326	0.965145	0.501104
8921.95	8.67845	8.72049e+06	8.1349e+06	7.93431e+06	8.76479e+06	8.22192e+06	0.221389	0.0118069	0.578258	0.252533	0.291592	0.0234932	0.203194	0.0503759	0.40107	0.511058	0.108111	0.119531
8931.34	17.4944	2.19972e+07	2.08931e+07	2.03232e+07	2.20459e+07	2.10221e+07	0.0683134	0.00083687	0.358655	0.304558	0.644129	0.0209738	0.378337	0.256983	0.224879	0.115011	0.71772	0.242447
8981.6	13.1995	170008	168561	155795	157586	159701	0.926868	0.160119	0.138317	0.962065	0.493221	0.724011	0.922024	0.504586	0.667414	0.0496838	0.0399915	0.376428
9068.72	9.43754	170354	148614	140303	143576	154801	0.0768322	0.0015759	0.0036815	0.035114	0.130057	0.000537991	0.00249221	0.000318916	0.105474	0.148698	0.210696	0.0297904
9093.84	14.6493	1.11097e+06	996545	967557	985491	1.00258e+06	0.0944996	0.00812043	0.0327245	0.0119471	0.341825	0.0154076	0.0329479	0.00350715	0.085854	0.164138	0.285236	0.127033
9142.21	15.7261	7.7251e+07	7.06956e+07	6.81825e+07	6.98782e+07	6.85726e+07	0.043102	0.000167175	0.00580342	0.00205045	0.184865	0.000450438	0.00739947	0.000567056	0.0483387	0.0277083	0.139731	0.305998
9173.7	14.3972	7.11514e+06	6.83132e+06	6.40661e+06	6.42742e+06	6.42714e+06	0.539831	0.00315485	0.00361527	0.0881695	0.76796	0.0821093	0.093471	0.140071	0.158617	0.0036231	0.0103536	0.693772
9300.17	15.9422	6.09686e+06	5.9839e+06	5.88901e+06	5.42501e+06	5.93979e+06	0.884097	0.455566	0.02723	0.262667	0.691352	0.643915	0.275847	0.667977	0.290417	0.123604	0.0111589	0.998212
9428.49	11.9863	7.80024e+07	7.07582e+07	6.8715e+07	7.05724e+07	6.9683e+07	0.0163265	0.000166191	0.0270615	0.0295041	0.128435	0.00584083	0.0105441	0.00190934	0.112629	0.100418	0.395149	0.16218
9443.22	16.9184	6.02909e+07	5.60618e+07	5.33034e+07	5.38276e+07	5.38856e+07	0.16687	0.00084158	0.00291667	0.0183082	0.382407	0.00712285	0.00733204	0.020451	0.0208278	0.00988183	0.0844012	0.59096
9483.94	12.4211	813264	805591	732719	728557	751152	0.71785	0.0134644	0.00382117	0.148298	0.599094	0.101519	0.111803	0.430721	0.493813	0.00546208	0.0192908	0.301494
9571.7	9.51684	155080	142402	133871	141071	140980	0.113516	8.40901e-05	0.0322043	0.0227722	0.180545	0.000457704	0.0294104	0.000173238	0.122095	0.030801	0.341528	0.0550261
9594.14	13.6819	582240	529419	504254	525242	525093	0.0617534	7.01237e-05	0.0126978	0.0129009	0.133452	0.000322346	0.0152963	0.000148003	0.0773086	0.0316589	0.207344	0.052671
9644.58	20.5378	5.04307e+06	4.59188e+06	4.36769e+06	4.50492e+06	4.53301e+06	0.0670309	8.63904e-06	0.00498671	0.0179725	0.124197	0.000593658	0.00688424	0.00134259	0.0169166	0.0196957	0.171319	0.0966379
9720.2	11.524	2.84768e+06	2.53046e+06	2.47012e+06	2.55391e+06	2.59591e+06	0.00371824	5.14307e-05	0.0207866	0.111649	0.0904706	0.0247512	0.0318816	0.0115009	0.0333069	0.0414301	0.348717	0.0251055
9730.97	19.1883	3.35309e+06	3.02464e+06	2.91099e+06	2.97522e+06	3.04784e+06	0.0405971	1.52153e-05	0.00393126	0.0739997	0.133495	0.00926521	0.0134213	0.0525414	0.0174398	0.00680714	0.144867	0.0613059
9788.71	10.9779	38718.7	36919.6	34221.9	34742.5	35727.9	0.349936	0.000469082	0.00338606	0.0276516	0.583868	0.0660273	0.00352857	0.0117429	0.0596667	0.000857369	0.147516	0.259218
9872.53	12.6368	25819.4	24049.1	22055.9	22917.2	23716.7	0.0772005	0.000294605	0.0131081	0.0702875	0.220556	0.00331978	0.0117388	0.00750704	0.227389	0.0247277	0.358471	0.0515239
9941.43	17.6228	747585	669188	655054	681015	690078	0.00973496	8.72539e-05	0.00968443	0.00823878	0.632917	0.0154076	0.0640749	0.0503919	0.00819298	0.028012	0.443252	0.159049
10091.5	18.5938	8762.19	7713.72	7580.12	9700.68	7971.06	0.179619	0.116496	0.911096	0.233476	0.364409	0.239616	0.883268	0.6072	0.323569	0.358897	0.864364	0.687759
10160.8	20.0811	36813.4	34740.5	33436.8	35209.7	34607.5	0.103143	0.00130605	0.114459	0.0895079	0.158654	0.0107904	0.242013	0.0502501	0.404354	0.0363805	0.296118	0.624022
10223.1	14.4385	7190.86	6772.1	6485.55	7245.92	7041.14	0.415385	0.0527704	0.634069	0.797302	0.278853	0.0353324	0.373937	0.257532	0.437137	0.049684	0.438542	0.386557
10273.5	17.6833	228588	202961	188258	261816	203403	0.131238	0.0559745	0.837039	0.176763	0.0515393	0.725772	0.173124	0.0699166	0.538214	0.0125282	0.114767	0.981752
10355.4	18.2497	32893.4	30798	29540	30398.7	29830.1	0.121445	0.00178289	0.00043137	0.0470605	0.967467	0.151103	0.127166	0.368244	0.0659435	0.00800748	0.0139308	0.668705
10459.8	10.8472	12140.1	11556.3	11187	12038.7	11654	0.210905	0.00865536	0.267717	0.118744	0.692813	0.0621532	0.438385	0.0906635	0.398247	0.202441	0.944975	0.105873
10639.5	15.9853	15246	10796.7	10547.5	15595.4	10624.4	0.875364	0.397004	0.844391	0.297583	0.2999	0.587777	0.508789	0.14836	0.173458	0.990734	0.664109	0.505625
10729.7	10.2518	3235.48	3141.52	3006.81	3218.25	3067.13	0.207084	0.0159356	0.995311	0.0255435	0.183491	0.047078	0.941477	0.0504908	0.695005	0.237366	0.557904	0.514549
11093.5	20.2055	30012.9	30382.7	32120.6	33576	30813.3	0.839799	0.0662282	0.160165	0.241922	0.504924	0.550441	0.762795	0.857156	0.495274	0.0112249	0.0274685	0.481749
11156.8	22.2849	10753	11139.1	10857.1	11394.8	10919.3	0.324537	0.658641	0.455466	0.509774	0.738047	0.535306	0.595966	0.92748	0.406196	0.421836	0.517286	0.805272
11533.1	24.7585	19080.7	18777.6	23400.9	29565.9	17707.9	0.767024	0.386724	0.563881	0.170745	0.90908	0.320493	0.781518	0.195031	0.765642	0.867795	0.952483	0.464886
11638.1	10.4631	1379.77	1381.35	1676.36	1989.58	1336.75	0.244827	0.629688	0.316076	0.377827	0.94797	0.910383	0.756584	0.132972	0.212516	0.548485	0.481962	0.398503
11686	22.0538	69829.8	68194.2	82589.8	87592.4	70169.4	0.342505	0.61818	0.440001	0.854706	0.624541	0.750389	0.665505	0.663696	0.0450582	0.436507	0.318705	0.0151937
11734.9	17.3578	238155	232171	260309	243143	245293	0.827006	0.540345	0.61081	0.260804	0.347427	0.339892	0.221117	0.434966	0.141478	0.922902	0.724679	0.0099943
11752.2	23.1858	134579	135478	146690	135864	138603	0.562013	0.637964	0.629053	0.255092	0.115019	0.162962	0.405396	0.188811	0.284274	0.538214	0.934069	0.0994958
12457.4	18.8598	5198.74	5295.91	5134.41	4890.67	5105.44	0.122566	0.646285	0.334573	0.542653	0.216367	0.819337	0.137653	0.934623	0.273279	0.493219	0.472115	0.677647
12866.4	23.0202	104558	103898	99203.5	110596	99502.4	0.966449	0.566787	0.376145	0.205808	0.560711	0.109377	0.811322	0.388924	0.928172	0.587361	0.285236	0.789104
12992.2	15.9251	642.857	694.788	658.526	700.12	631.337	0.288797	0.499375	0.0693884	0.537825	0.405396	0.552683	0.147088	0.390339	0.425721	0.935326	0.559239	0.122146
13357.3	21.0032	18897.7	19154.2	19309.7	19005.7	18810.2	0.454196	0.47149	0.904112	0.837606	0.389976	0.707463	0.184244	0.371798	0.980119	0.424247	0.439267	0.475979
13767.8	24.2334	4.32618e+06	4.33062e+06	3.98025e+06	4.32596e+06	4.06191e+06	0.979229	0.137605	0.968106	0.230463	0.4936	0.0740343	0.371313	0.0920919	0.496264	0.958273	0.725577	0.606989
13882.6	16.4568	1.31919e+06	1.2789e+06	1.21514e+06	1.30794e+06	1.22805e+06	0.585289	0.209976	0.994663	0.208353	0.289347	0.028171	0.196052	0.0529522	0.716602	0.876997	0.458413	0.434847
13909	22.9976	1.08447e+06	1.06619e+06	996192	1.06135e+06	1.00938e+06	0.758362	0.092401	0.742729	0.203693	0.449737	0.028923	0.250321	0.0986993	0.77291	0.521287	0.996733	0.487893
14016.5	9.22637	62291	61586.9	57987.4	61633.6	59188.2	0.922016	0.507066	0.982006	0.293549	0.56534	0.155988	0.57046	0.081722	0.666591	0.78265	0.562628	0.981611
14040.8	15.3543	894190	886439	827836	878177	852958	0.949634	0.271216	0.831763	0.408533	0.496503	0.133458	0.413506	0.19128	0.646391	0.916755	0.705878	0.446466
14063.2	21.3793	999338	1.01302e+06	928075	969779	955082	0.680917	0.13811	0.601814	0.437915	0.78719	0.130025	0.344891	0.245624	0.498031	0.498381	0.752683	0.506612
14144	29.3285	620423	631656	574834	604496	595574	0.604174	0.13435	0.663677	0.477171	0.89762	0.142718	0.494912	0.312466	0.738895	0.283148	0.886182	0.676094
14973	26.3452	3770.97	3683.99	3487.36	3691.55	3437.3	0.40817	0.159429	0.550589	0.00601866	0.261519	0.1149	0.357218	0.0503603	0.96679	0.40668	0.855511	0.428152
15134.2	26.1444	489181	516818	480417	526927	458253	0.397004	0.557384	0.769785	0.0729529	0.993492	0.028217	0.89616	0.57445	0.441084	0.80133	0.670787	0.0169164
15337.9	32.0498	29304.2	30635.5	28114.5	30954.1	27805.4	0.483604	0.439554	0.683392	0.0649729	0.618958	0.158346	0.845562	0.175064	0.908777	0.475858	0.939192	0.128669
15764.2	24.9277	4446.32	4475.28	4319.55	4678.44	4243.74	0.738795	0.724809	0.575049	0.247771	0.69315	0.127166	0.965002	0.201032	0.617511	0.916755	0.952483	0.338381
15878	31.7453	441307	472618	430035	487661	420705	0.3378	0.517537	0.678222	0.0420204	0.762795	0.0406161	0.889711	0.151686	0.50799	0.904478	0.699984	0.0318151
16088	34.566	17561.9	18592.3	16799.2	19299	16853	0.480571	0.538483	0.634069	0.0334978	0.777905	0.0573543	0.889711	0.108317	0.71716	0.578398	0.729631	0.127033
17406	32.5271	85542.2	81844.3	74384.2	83497.3	79280.1	0.923177	0.236445	0.787814	0.302017	0.665505	0.139828	0.514036	0.396379	0.633964	0.82536	0.267708	0.173029
17617.4	29.5792	4077.28	3952.03	3661.34	4042.27	3815.36	0.774131	0.404821	0.520286	0.288847	0.636134	0.0740431	0.677402	0.219839	0.712594	0.941367	0.264293	0.574152

## Sheet: Table_S2
Table S2. Components of serum peptidome with abundances correlated with volume of tissue irradiated at a given dose
	within-treatment sample C															post-treatment sample D															post-treatment sample E
component	10 Gy		20 Gy		30 Gy		40 Gy		50 Gy		60 Gy		70 Gy			10 Gy		20 Gy		30 Gy		40 Gy		50 Gy		60 Gy		70 Gy			10 Gy		20 Gy		30 Gy		40 Gy		50 Gy		60 Gy		70 Gy
m/z	rho	p-value	rho	p-value	rho	p-value	rho	p-value	rho	p-value	rho	p-value	rho	p-value		rho	p-value	rho	p-value	rho	p-value	rho	p-value	rho	p-value	rho	p-value	rho	p-value		rho	p-value	rho	p-value	rho	p-value	rho	p-value	rho	p-value	rho	p-value	rho	p-value
2058.02	-0.0276943	0.747731	-0.00938544	0.913228	-0.0144772	0.866502	-0.0124144	0.891467	0.0419058	0.64493	0.0635552	0.484424	0.112368	0.215617		0.0386384	0.654775	0.0158771	0.854267	-0.0151758	0.860638	0.106526	0.24251	0.110386	0.22579	0.117285	0.197963	0.119539	0.189437		0.115667	0.181352	0.11294	0.191913	0.0856941	0.322612	0.0746037	0.415544	0.0758231	0.407946	0.0724902	0.428907	0.0806056	0.378948
2072.41	-0.0754849	0.380202	-0.0616564	0.473681	-0.0758863	0.377669	-0.0670377	0.460768	-0.0453947	0.617628	-0.0347345	0.702526	0.0140653	0.877136		0.0604981	0.483671	0.0415295	0.630787	0.00371643	0.965725	0.132069	0.146869	0.122414	0.178953	0.121786	0.181205	0.120431	0.186136		0.0613306	0.479315	0.0538191	0.534823	0.0247634	0.775305	0.0115093	0.900172	0.0232421	0.799972	0.0281466	0.75894	0.0532787	0.561147
2080.85	-0.127453	0.137635	-0.112821	0.18907	-0.102614	0.232472	-0.0694948	0.44447	-0.0133624	0.883233	-0.00183153	0.983964	0.0653416	0.472208		0.0514145	0.551758	0.0323267	0.708359	0.00713229	0.934255	0.147349	0.105264	0.177453	0.0506429	0.173329	0.0563223	0.174162	0.055135		0.0638572	0.46137	0.0711345	0.411821	0.052868	0.542074	0.0677009	0.460088	0.0684663	0.455022	0.038152	0.677392	0.0512329	0.576298
2170.9	-0.0458678	0.59414	-0.0415788	0.629107	-0.0687363	0.424336	-0.0539655	0.552798	-0.0362694	0.690042	-0.0374818	0.680239	0.0100153	0.912352		0.0880302	0.307746	0.0628214	0.467012	0.0253471	0.769316	0.122295	0.179378	0.125242	0.169061	0.10492	0.249715	0.0986548	0.279234		0.0615842	0.477496	0.0477466	0.581934	0.0249342	0.773798	0.0165763	0.856608	0.0156551	0.8645	0.00509416	0.955739	0.031283	0.73304
2214.01	-0.0211744	0.805766	-0.0131424	0.878713	-0.0265555	0.757776	-0.0592408	0.514612	-0.0302718	0.739269	-0.0244612	0.787996	-0.00822897	0.927943		0.0950432	0.270683	0.074047	0.391127	0.0438386	0.611901	0.126677	0.164204	0.125546	0.168023	0.111093	0.222817	0.100294	0.271294		0.100888	0.243976	0.103097	0.233761	0.0901522	0.298007	0.0874069	0.33994	0.100298	0.273282	0.0904146	0.323534	0.09727	0.288082
2280.99	0.0911942	0.288835	0.105121	0.221216	0.0929537	0.279603	0.0904412	0.319352	0.153771	0.0894856	0.187628	0.0378316	0.222743	0.0134233		0.0489099	0.57132	0.0120128	0.88948	-0.0103621	0.904592	0.0678307	0.457343	0.0696416	0.445399	0.0948084	0.298476	0.117636	0.19662		0.0929519	0.283207	0.0851039	0.325966	0.0601941	0.487508	0.0234047	0.798603	0.0174909	0.848787	0.0287969	0.753546	0.0479407	0.601074
2357.78	-0.15994	0.0619778	-0.148137	0.0840778	-0.139601	0.103698	-0.11289	0.21348	-0.0826508	0.362939	-0.0832312	0.35957	-0.0548942	0.545978		0.0200324	0.816723	0.00944134	0.913037	0.010405	0.904198	0.106585	0.242246	0.155188	0.0878589	0.166039	0.0676414	0.172298	0.0578214		-0.0681543	0.431723	-0.0785728	0.364563	-0.0865086	0.318021	-0.0626948	0.49398	-0.0503116	0.583183	-0.0657364	0.473232	-0.0202954	0.8249
2378.96	-0.0472072	0.583403	-0.0405847	0.637334	-0.0567607	0.509552	-0.0872425	0.336821	-0.0964582	0.288114	-0.108473	0.23203	-0.100212	0.269698		0.0614331	0.476928	0.0367015	0.671047	0.012862	0.881721	0.0724437	0.427268	0.0664428	0.466616	0.0798722	0.381318	0.0840028	0.357121		-0.0411667	0.635048	-0.0433811	0.616945	-0.0487172	0.574276	-0.0678363	0.459189	-0.0152215	0.868219	0.015147	0.868859	0.0594025	0.51697
2385.72	-0.143153	0.0951358	-0.131835	0.124528	-0.134994	0.115693	-0.105151	0.246703	-0.0596665	0.511592	-0.0655996	0.470458	-0.0317615	0.726934		0.106045	0.21888	0.0835838	0.332892	0.068513	0.427568	0.142293	0.117858	0.147607	0.104652	0.14493	0.111151	0.13694	0.132436		-0.00804312	0.926156	-0.0161009	0.852783	-0.0243732	0.778754	-0.0421217	0.645988	-0.0343856	0.707712	-0.0547284	0.550528	-0.0287901	0.753602
2392.66	-0.0897848	0.296377	-0.0935837	0.276346	-0.0940878	0.273759	-0.0899511	0.32199	-0.0128013	0.888105	0.00740994	0.935101	0.072255	0.426556		0.0292209	0.735281	0.00375936	0.965329	-0.00209437	0.98069	0.0263994	0.772562	0.0698002	0.444361	0.0904465	0.321335	0.124991	0.169923		-0.0068725	0.936882	-0.0176958	0.838388	-0.0221978	0.798059	-0.00323127	0.971927	0.00351578	0.969454	-0.0221582	0.809119	-0.00750576	0.93481
2428.44	-0.133823	0.11891	-0.131476	0.125565	-0.0977607	0.255402	-0.0444532	0.624946	0.000709394	0.993806	-0.0201339	0.824837	0.028537	0.753719		0.0571442	0.508272	0.0404179	0.639966	0.033028	0.702328	0.115587	0.204571	0.166112	0.06752	0.177598	0.0504517	0.184815	0.0416858		-0.013028	0.880651	-0.00572627	0.947397	0.000512145	0.995312	0.0274082	0.765078	0.0814659	0.373869	0.0539493	0.556222	0.0965113	0.291873
2476.13	-0.00999216	0.907642	-0.0142625	0.868464	-0.00663655	0.938589	-0.0384427	0.672507	0.0329997	0.716733	0.0668184	0.462238	0.107286	0.2372		0.0119937	0.889654	-0.0104718	0.903586	-0.0325939	0.706059	0.0445805	0.625394	0.0384805	0.673484	0.0569326	0.532857	0.0846372	0.353491		0.0439177	0.612593	0.0264413	0.760527	0.00836016	0.923253	0.0138396	0.880092	-0.00519577	0.954856	0.00968026	0.915977	0.0470736	0.607678
2518.01	-0.0276523	0.748101	-0.0311479	0.717532	-0.0431516	0.616183	-0.0588281	0.51755	0.00446918	0.960842	0.0573899	0.527854	0.0949362	0.295816		0.0177329	0.837453	0.00969896	0.910673	-0.00474214	0.956267	0.0433314	0.635122	0.025104	0.78344	0.0343102	0.707155	0.0347398	0.703658		0.100137	0.247518	0.092508	0.28552	0.0710809	0.412175	0.039351	0.667845	0.0158651	0.8627	0.0178228	0.845952	0.0414104	0.651571
2541.59	-0.0750789	0.382776	-0.0692217	0.421066	-0.0534798	0.534357	-0.0378558	0.677225	0.00252802	0.977856	0.00304394	0.973333	0.0529401	0.560378		-0.0472258	0.584655	-0.0632842	0.463732	-0.051925	0.547811	-0.0143182	0.875459	0.0466095	0.60973	0.0456578	0.617055	0.064361	0.480718		0.0190616	0.826104	0.0313384	0.717903	0.0343235	0.692333	0.069225	0.450031	0.089893	0.326342	0.0785124	0.391482	0.103103	0.260042
2573.32	0.09672	0.260515	0.111034	0.196209	0.132166	0.123578	0.172002	0.0572183	0.213934	0.0176563	0.228412	0.0111953	0.214501	0.0173523		0.035213	0.683658	0.0215829	0.802815	0.029407	0.733659	0.0782133	0.39131	0.0956741	0.29407	0.0983904	0.280529	0.0913783	0.316359		0.0492732	0.569911	0.0462882	0.593528	0.0364111	0.674653	0.00985639	0.914453	0.00373256	0.967569	0.0215892	0.813931	0.0443097	0.628937
2588.19	0.0138798	0.871964	-0.00138145	0.987222	-0.00128811	0.988087	0.00646193	0.943393	0.0201532	0.824672	0.0342637	0.706372	0.0293044	0.747316		-0.0146224	0.865672	-0.0341301	0.692888	-0.0374887	0.664415	0.00920293	0.919772	0.0246546	0.787224	0.0390753	0.668732	0.0662115	0.468172		-0.0626183	0.470122	-0.0694274	0.423155	-0.0942445	0.276544	-0.0969245	0.289804	-0.0815269	0.37351	-0.0519916	0.570657	0.015777	0.863455
2599.01	-0.0908208	0.29082	-0.0976207	0.256086	-0.0915769	0.28681	-0.0545008	0.548862	-0.03378	0.71033	0.00529466	0.953611	0.0475681	0.600879		-0.0221411	0.797823	-0.0595582	0.4905	-0.0598779	0.488171	0.0217004	0.812219	0.0498544	0.585043	0.045215	0.620477	0.080163	0.379582		-0.0445274	0.607664	-0.0594283	0.493071	-0.0791484	0.361052	-0.087224	0.340955	-0.0895475	0.32821	-0.0958136	0.295388	-0.0400623	0.662206
2616.6	0.0451117	0.600239	0.0274283	0.750074	0.00771464	0.928634	0.00622977	0.945425	0.00921567	0.919328	0.0285563	0.753557	0.0496253	0.585214		-0.000658366	0.993944	-0.0254902	0.76805	-0.0473928	0.583326	-0.0818615	0.369542	-0.0660595	0.469195	-0.0281045	0.75831	0.0203258	0.823917		-0.00119013	0.989077	-0.0433763	0.616985	-0.0655204	0.449763	-0.0369259	0.687208	-0.0524861	0.566994	-0.0474936	0.604475	-0.0250847	0.784486
2634.73	-0.0292157	0.734376	-0.028651	0.739324	-0.0455924	0.596358	-0.0940978	0.300116	-0.126472	0.163139	-0.135043	0.136291	-0.0774851	0.393781		0.079333	0.358128	0.0643099	0.456507	0.0522256	0.545494	0.0829718	0.363069	0.0610962	0.503288	0.0769841	0.398814	0.0753252	0.409077		-0.0299483	0.729921	-0.0460345	0.595555	-0.0688908	0.426754	-0.032272	0.724933	-0.0196518	0.830368	-0.0277808	0.761979	0.0135483	0.882598
2642.3	-0.166898	0.0513529	-0.15398	0.0724542	-0.127924	0.136176	-0.100998	0.265941	-0.0594536	0.513101	-0.0304072	0.738145	0.0508506	0.575974		-0.0248795	0.773455	-0.0280139	0.745834	-0.0225609	0.794074	0.0421815	0.644133	0.0715648	0.432909	0.0596423	0.513515	0.0685511	0.45257		-0.0345235	0.690632	-0.00414106	0.961952	-0.00420447	0.96137	0.0567674	0.535759	0.0537055	0.558011	0.0120444	0.895554	0.0522761	0.568548
2670.57	0.0138098	0.872604	-0.00308025	0.971487	0.00755596	0.930098	-0.0155938	0.863905	0.0162	0.858667	-0.004366	0.961746	-0.051947	0.567766		-0.0177568	0.837238	-0.0276514	0.749013	-0.0104289	0.90398	0.0144306	0.87449	0.0526104	0.564446	0.015607	0.86435	-0.0193939	0.831868		0.013706	0.874488	0.0262852	0.761898	0.0280314	0.7466	0.0519984	0.570607	0.120167	0.18896	0.104417	0.253992	0.113284	0.215702
2683.57	0.0272509	0.751637	0.0513842	0.550511	0.052201	0.544187	0.0601953	0.507851	0.117779	0.194218	0.118243	0.192456	0.127123	0.160969		-0.0410715	0.634562	-0.0693383	0.422012	-0.0836458	0.332533	-0.0396701	0.663994	0.0352024	0.6999	0.0722455	0.428537	0.115726	0.204025		-0.022271	0.797407	-0.0434104	0.616707	-0.0459906	0.595906	-0.0416272	0.649868	-0.0310121	0.735266	-0.0121867	0.894327	0.0519713	0.570808
2699.63	0.0060765	0.943764	0.0245347	0.775701	0.02369	0.783229	0.00547523	0.95203	0.0830507	0.360616	0.106544	0.240472	0.146006	0.107039		0.0518773	0.54818	0.0422022	0.62526	0.0369734	0.668753	0.0575142	0.528675	0.0906778	0.320095	0.118905	0.19181	0.167546	0.065161		-0.0211882	0.807061	-0.0384109	0.657881	-0.0583894	0.500671	-0.0692996	0.449542	-0.0725511	0.428518	-0.0894594	0.328688	-0.0300772	0.742963
2710.59	0.00420968	0.961031	0.0143605	0.867568	0.0212631	0.804969	0.0315874	0.728372	0.115289	0.203863	0.164276	0.0694769	0.245663	0.00628401		-0.00859692	0.92079	-0.0249702	0.772652	-0.0288106	0.738863	0.0198499	0.827975	0.0528813	0.56244	0.063449	0.486967	0.0880078	0.334596		0.0594869	0.492644	0.0633255	0.465115	0.0588625	0.497202	0.0439168	0.631985	0.0289866	0.751975	0.00512803	0.955445	0.0222192	0.808604
2755.96	0.0107296	0.900858	0.0194476	0.821331	0.0429275	0.618017	0.080729	0.374234	0.0951039	0.294961	0.114129	0.208477	0.157369	0.0821697		-0.0517485	0.549174	-0.0345499	0.689304	-0.0241544	0.779887	-0.0217268	0.811995	0.00501948	0.956204	0.013393	0.88345	0.0309529	0.734684		-0.0178812	0.836718	0.00271681	0.97504	0.00686762	0.936927	0.0905026	0.323061	0.0383281	0.675986	0.0217179	0.812842	0.00400352	0.965214
2790.87	0.160995	0.06026	0.15539	0.0698551	0.170245	0.0468092	0.187815	0.0376382	0.187435	0.0380326	0.132534	0.143774	0.0636068	0.484069		-0.0137255	0.873842	-0.0501264	0.561778	-0.052278	0.54509	-0.00472208	0.958798	-0.00994974	0.913284	-0.0204381	0.822959	-0.0300541	0.742113		0.0902741	0.297352	0.101375	0.241695	0.0889182	0.30469	0.117992	0.197134	0.107844	0.23867	0.0814998	0.37367	0.0639073	0.485651
2810.16	0.0897334	0.296654	0.0791905	0.357205	0.0871992	0.310547	0.0490965	0.589223	0.0954586	0.293157	0.129993	0.151667	0.129019	0.154777		0.0474691	0.58272	0.0165116	0.848511	-0.00362578	0.966561	0.0939162	0.303062	0.0537471	0.556052	0.0429812	0.637861	-0.00435198	0.962027		0.0800215	0.355766	0.0650863	0.452777	0.0358209	0.679633	0.0452987	0.621294	0.0184934	0.840231	0.0189812	0.836075	0.0103509	0.910177
2825.18	0.0956652	0.265768	0.0935697	0.276418	0.105573	0.219225	0.0876553	0.334533	0.123267	0.174134	0.11022	0.22456	0.106886	0.238961		-0.00911216	0.916058	-0.0164925	0.848684	-0.00829159	0.923595	0.0693177	0.447522	0.0872411	0.338836	0.0843134	0.355341	0.0760456	0.404601		-0.0433665	0.617064	-0.0289386	0.738691	-0.0345137	0.690715	0.00563609	0.951033	-0.0211083	0.818004	-0.0544506	0.552555	-0.0340943	0.710077
2853.02	-0.0565507	0.511122	-0.0670515	0.435801	-0.0702065	0.414477	-0.116753	0.19815	-0.0967806	0.2865	-0.0835472	0.357744	-0.0363854	0.689101		0.0465961	0.589678	0.0572349	0.507599	0.0419493	0.627335	0.0438469	0.631099	0.0473959	0.603704	0.0668328	0.464	0.0618761	0.497847		0.0618086	0.475891	0.0386304	0.656051	0.0121061	0.889041	0.0217992	0.812155	-0.0489026	0.593786	-0.0944181	0.302502	-0.0938287	0.30554
2869.85	-0.162969	0.05715	-0.142331	0.0970642	-0.122953	0.152161	-0.103894	0.252423	-0.0534173	0.556844	-0.0419961	0.644217	0.0372561	0.68206		-0.0176423	0.838273	-0.0328324	0.704008	-0.019999	0.817023	0.0684189	0.453444	0.13234	0.146036	0.142968	0.116114	0.145915	0.108724		-0.0691689	0.424887	-0.0669301	0.440056	-0.0581699	0.502284	0.027476	0.764514	0.0592467	0.518072	0.0218534	0.811696	0.0366752	0.689222
2900.68	0.0132638	0.877602	-0.00930144	0.914002	0.00250621	0.976803	0.00184442	0.983851	0.0221073	0.807984	-0.00229586	0.979892	0.0239711	0.792147		0.0208101	0.80974	-0.00670292	0.938206	-0.00307714	0.971622	0.0374297	0.681911	0.0662049	0.468216	0.0683264	0.454056	0.092211	0.311955		-0.0819969	0.343987	-0.0964881	0.265231	-0.0983319	0.256175	-0.117552	0.19882	-0.0857269	0.34933	-0.0419388	0.647422	0.0231744	0.800543
2937.61	0.111566	0.194064	0.102428	0.233326	0.127289	0.138143	0.159833	0.0774442	0.1689	0.0619071	0.141666	0.117968	0.157917	0.0810986		0.0662278	0.443169	0.0472735	0.584275	0.0487572	0.572523	0.0577191	0.527206	0.0319112	0.72679	0.0108023	0.905884	0.0051054	0.955454		0.0658814	0.447266	0.0642815	0.458393	0.0533509	0.538387	0.102202	0.264247	0.0713792	0.43603	0.0485368	0.596553	0.0307004	0.737829
3045.87	-0.150741	0.0787246	-0.132031	0.123965	-0.114875	0.181105	-0.100747	0.267138	0.000103185	0.999123	0.0553327	0.542771	0.155131	0.0866604		-0.0523735	0.544356	-0.0805401	0.350844	-0.082997	0.336307	0.00974486	0.915064	0.0687494	0.451262	0.0654185	0.473526	0.0868512	0.341005		-0.0523071	0.546373	-0.0594283	0.493071	-0.0742708	0.391471	-0.0460507	0.615509	-0.0521203	0.569703	-0.0780721	0.39415	-0.032963	0.719287
3075.5	0.0536804	0.532823	0.012349	0.885985	-0.00917543	0.915163	-0.0434471	0.632807	-0.0738995	0.416085	-0.0617559	0.496897	-0.0208304	0.818879		0.00734221	0.932324	0.0229808	0.790329	0.0268403	0.75614	0.022011	0.809582	0.0285076	0.754952	0.061202	0.502549	0.0686304	0.452047		-0.0474246	0.584484	-0.0644522	0.457198	-0.0895961	0.301006	-0.0548842	0.549392	-0.0408075	0.656319	-0.00764802	0.933577	0.0388362	0.671938
3087.61	-0.0452611	0.599032	-0.0426429	0.62035	-0.0180102	0.834341	0.00980253	0.914208	0.0156002	0.863849	0.0264346	0.771344	0.0653996	0.471814		-0.0671867	0.436583	-0.0395735	0.646976	-0.0199227	0.817709	-0.0194798	0.831135	0.0137829	0.880081	0.0165719	0.85605	0.0238153	0.794305		-0.0479904	0.580005	-0.0382938	0.658858	-0.0301239	0.728399	0.0659057	0.472091	0.0276724	0.76288	-0.0111164	0.903564	-0.0191844	0.834344
3102.96	-0.0445283	0.604965	-0.0293418	0.733274	-0.0136931	0.873671	0.0188634	0.835731	0.00716488	0.937244	0.0140653	0.877136	0.051502	0.571091		0.0189495	0.826471	0.0398216	0.644913	0.0597538	0.489074	0.106552	0.242393	0.11299	0.21498	0.0957931	0.293468	0.0853972	0.349173		0.00943323	0.913435	0.0129304	0.881538	0.0141645	0.870325	0.0338775	0.711838	0.0175044	0.848672	-0.00803414	0.93023	0.0126406	0.890415
3112.76	-0.135405	0.114582	-0.119687	0.163414	-0.0939524	0.274452	-0.0574286	0.527575	-0.0515407	0.570801	-0.0737769	0.41686	-0.0423766	0.641217		0.0123324	0.886558	0.0240399	0.780904	0.0428367	0.620065	0.0894287	0.326828	0.0941871	0.301665	0.0673284	0.460687	0.0476999	0.601383		-0.0515267	0.552382	-0.0411667	0.635048	-0.0384645	0.657433	-0.0221718	0.809004	-0.0124577	0.891991	-0.038511	0.674528	0.00569706	0.950503
3144.69	0.1504	0.0794089	0.112751	0.189346	0.111986	0.192382	0.105964	0.243055	0.0884033	0.330412	0.0448401	0.621934	0.0510828	0.574231		0.104127	0.227362	0.100596	0.243577	0.100186	0.245513	0.112276	0.217906	0.0816302	0.3709	0.0671037	0.462187	0.0435363	0.633522		-0.046932	0.588396	-0.0650424	0.453082	-0.0791972	0.360756	-0.0480558	0.600199	-0.047602	0.60365	-0.0247595	0.787213	0.00762092	0.933812
3159.09	-0.0440336	0.608985	-0.0532091	0.536431	-0.0240913	0.77965	-0.000915763	0.991996	0.074396	0.412952	0.0631425	0.48727	0.147412	0.103675		0.0169505	0.844533	-0.00369734	0.965901	0.0029054	0.973206	0.0646122	0.479005	0.0865274	0.342814	0.0658679	0.470488	0.0825356	0.365603		-0.1289	0.136108	-0.124715	0.14937	-0.135075	0.118209	-0.0683308	0.455916	-0.0562187	0.539714	-0.0710202	0.438346	-0.0184392	0.840693
3195	0.110516	0.198314	0.0895841	0.297461	0.0956606	0.265792	0.0727129	0.423625	0.14224	0.116475	0.124376	0.170268	0.148018	0.10225		0.0878823	0.308561	0.0247984	0.774174	-0.000386432	0.996455	0.00127883	0.988858	-0.00776218	0.932304	-0.00985721	0.914088	0.000360187	0.996883		0.104575	0.227099	0.0966589	0.264384	0.0801288	0.35512	0.065628	0.473963	0.052398	0.567646	0.0604525	0.509579	0.0426162	0.642118
3208.48	0.0723253	0.400506	0.0845577	0.325475	0.116905	0.173476	0.124808	0.16878	0.245289	0.00636577	0.233894	0.00935693	0.238131	0.00812422		0.0933066	0.279564	0.0414246	0.631652	0.020228	0.814965	0.0207223	0.820538	0.0109345	0.904738	-0.00967877	0.915638	0.00143083	0.987531		0.137548	0.111577	0.139518	0.106504	0.120003	0.165447	0.0753421	0.410933	0.0456171	0.618841	0.00063677	0.99449	-0.0299417	0.744081
3218.56	0.107963	0.208927	0.105214	0.220805	0.1481	0.0841566	0.0420412	0.643861	0.104939	0.247665	0.0942978	0.299087	0.064658	0.476863		0.13944	0.105392	0.113878	0.186577	0.104666	0.224954	0.0398684	0.662417	-0.00476834	0.958394	-0.0440188	0.629761	-0.0640702	0.482706		0.0869964	0.315293	0.10559	0.222604	0.105097	0.224778	0.125125	0.171253	0.132008	0.148757	0.116393	0.203304	0.106036	0.246672
3246.95	0.0728574	0.397043	0.0661461	0.442034	0.0545018	0.526566	0.0151359	0.867865	0.056558	0.533861	0.0601888	0.507897	0.0811675	0.371638		0.0797529	0.355584	0.0345594	0.689223	0.0184199	0.831248	0.0741158	0.416656	0.0954891	0.295008	0.142459	0.117428	0.137885	0.129767		-0.00885767	0.9187	-0.00308263	0.971678	-0.0238904	0.783028	-0.0216908	0.813072	0.00319062	0.97228	0.0596667	0.515105	0.10483	0.252109
3265.75	0.112649	0.189751	0.0898454	0.296049	0.0897521	0.296553	0.0746798	0.411169	0.126878	0.161783	0.101076	0.265573	0.127407	0.160031		0.0772005	0.371226	0.0126998	0.883202	-0.00891656	0.917854	0.00885927	0.92276	-0.00612978	0.946523	-0.013664	0.881109	-0.0104058	0.909325		0.0706126	0.415267	0.0640084	0.460308	0.0481368	0.57885	0.0533735	0.56045	0.0458474	0.61707	0.0602019	0.511338	0.0503184	0.583133
3285.65	0.0419895	0.625721	0.0411354	0.632771	0.0622865	0.469167	0.101314	0.264442	0.180109	0.0463304	0.157698	0.0815257	0.19102	0.0344512		0.0942703	0.274612	0.0452746	0.600282	0.0267067	0.757316	0.0921714	0.312164	0.0696944	0.445053	0.0493852	0.588584	0.0385466	0.672956		0.116262	0.179105	0.113116	0.19122	0.0877036	0.311363	0.118012	0.197056	0.0610757	0.505218	0.0179176	0.845143	0.00178838	0.984474
3317.35	0.138929	0.105384	0.103604	0.227981	0.119043	0.165704	0.00837729	0.926648	0.0263508	0.77205	0.0277244	0.760516	0.0276019	0.761543		0.131382	0.127248	0.0985211	0.253477	0.100196	0.245467	0.0200878	0.825945	-0.0173385	0.849467	-0.0536612	0.556685	-0.0736466	0.419618		0.0769144	0.374797	0.0844454	0.329733	0.0963565	0.265886	0.171528	0.0600289	0.147406	0.106593	0.145346	0.111616	0.141221	0.122235
3351.24	0.056406	0.512205	0.0222152	0.796421	-0.00466705	0.956798	-0.00441759	0.961294	-0.054288	0.550425	-0.0572481	0.528876	-0.0945235	0.297928		-0.0738467	0.392413	-0.072487	0.401206	-0.0739469	0.39177	-0.0927926	0.308903	-0.034449	0.706024	0.0508722	0.577396	0.0895146	0.326362		-0.0862501	0.319474	-0.136294	0.114902	-0.146834	0.0892363	-0.142474	0.11893	-0.131967	0.148882	-0.0646796	0.480386	0.0114686	0.900522
3399.31	0.0125637	0.884017	0.00395766	0.963363	-0.0044477	0.958828	0.0248481	0.784723	0.0760019	0.402919	0.0791425	0.383718	0.128716	0.155754		0.0379562	0.660488	-0.00330614	0.969509	-0.00730881	0.932631	0.00176128	0.984644	0.0443889	0.626882	0.0723578	0.427818	0.099547	0.274892		-0.00359965	0.966926	-0.015857	0.854989	-0.0265194	0.759841	-0.00698415	0.939334	0.0355711	0.698116	0.0357201	0.696913	0.0837759	0.360437
3449.75	-0.0261215	0.761615	-0.0111216	0.897254	0.00225419	0.979137	0.023913	0.792639	0.031381	0.730078	0.0636713	0.483625	0.119546	0.187575		-0.0587377	0.496503	-0.0420304	0.626669	-0.0339965	0.69403	-0.0135582	0.882022	0.00475512	0.95851	0.0142786	0.875802	0.0273114	0.764929		-0.0682129	0.431327	-0.0642035	0.45894	-0.0478197	0.581355	0.0376236	0.681616	0.0476697	0.603134	0.04916	0.591842	0.0490516	0.59266
3473.43	0.0268636	0.755055	0.028021	0.744857	0.0457838	0.594816	0.0589248	0.516861	0.120687	0.183374	0.0978189	0.281343	0.134185	0.138815		0.0158246	0.854743	-0.0363914	0.673667	-0.0431039	0.617883	-0.00554159	0.951651	-0.00352586	0.969237	0.000974817	0.991514	0.0219846	0.809806		0.110765	0.200656	0.105048	0.224995	0.0988391	0.253721	0.134142	0.142257	0.139839	0.125962	0.155216	0.0891344	0.149323	0.102077
3509.23	0.0721806	0.401451	0.0806513	0.348383	0.0802873	0.350569	0.0195535	0.82981	0.0861397	0.342982	0.127259	0.160521	0.176226	0.0513075		0.0267878	0.756602	-0.00346835	0.968013	-0.0244836	0.776966	-0.0225265	0.805209	-0.000228008	0.998037	0.0265514	0.771288	0.0531192	0.560681		0.165525	0.0551196	0.152219	0.0780166	0.142279	0.0997031	0.132916	0.145965	0.122958	0.178836	0.108983	0.233728	0.128458	0.160063
3520.04	-0.0449717	0.601372	-0.00955346	0.911681	0.0170534	0.843026	0.00950588	0.916795	0.0888548	0.327941	0.119004	0.189594	0.188744	0.0366902		0.0125662	0.884422	-0.0270979	0.753874	-0.0416631	0.629688	0.0116681	0.898378	0.0418114	0.647045	0.0335767	0.713139	0.0491539	0.590334		0.147361	0.0880848	0.147322	0.0881697	0.122354	0.157271	0.119537	0.191303	0.0649235	0.47873	0.025315	0.782556	0.0208779	0.819957
3590.41	-0.0192423	0.823186	-0.012251	0.886884	-0.00797599	0.926222	0.021385	0.814143	0.0350634	0.699844	0.0266925	0.769175	0.0414931	0.648192		-0.00485187	0.955256	-0.0288059	0.738905	-0.0337961	0.695744	0.0645461	0.479455	0.0822712	0.367145	0.0910875	0.317906	0.0575076	0.528722		0.0353185	0.683884	0.0396498	0.647575	0.0298703	0.730597	0.0399065	0.66344	0.0505284	0.58156	0.0878946	0.337244	0.136818	0.134414
3616.32	0.0817574	0.341796	0.0863125	0.315507	0.0712706	0.407426	0.0143427	0.874733	0.0486773	0.592409	0.0596794	0.5115	0.0742348	0.413968		-0.0159868	0.853271	-0.0220505	0.798633	-0.0383092	0.657529	0.0146156	0.872893	0.0674804	0.459674	0.117252	0.19809	0.144574	0.11204		-0.0217393	0.802144	-0.030597	0.724304	-0.0442103	0.610225	-0.00819672	0.928821	0.00527029	0.954209	0.0416475	0.649708	0.134907	0.139978
3689.43	-0.0655348	0.446272	-0.0598176	0.48699	-0.0464232	0.589677	-0.0601501	0.50817	-0.0755633	0.405644	-0.0772788	0.395045	-0.0308328	0.734615		0.0328467	0.703885	0.0455608	0.597978	0.0622871	0.470815	0.141071	0.121072	0.1561	0.0859925	0.149973	0.0991591	0.106975	0.24052		-0.0560433	0.518058	-0.0733685	0.397263	-0.0754463	0.384003	0.0106693	0.907426	0.0325837	0.722385	0.0141173	0.877703	0.0501219	0.584605
3720.58	-0.0421528	0.624376	-0.0254261	0.767779	-0.0255754	0.766454	-0.028666	0.752641	0.0349151	0.701053	0.0903316	0.319941	0.169365	0.0611858		-0.116077	0.178169	-0.122866	0.153983	-0.125929	0.143918	-0.0851263	0.350708	-0.0380046	0.677295	0.0246414	0.787336	0.0714987	0.433335		0.0570091	0.510863	0.049244	0.57014	0.037489	0.665592	0.00541255	0.952974	0.019076	0.835267	0.0317301	0.729371	0.0778418	0.39555
3728.32	-0.0219538	0.798765	0.0152846	0.859131	0.0350076	0.684295	0.0504895	0.578691	0.12773	0.158969	0.157479	0.0819546	0.221653	0.0138936		-0.0228758	0.791265	-0.0297219	0.730916	-0.0335719	0.697663	0.00810585	0.929313	0.0428159	0.639155	0.0481361	0.598058	0.0590276	0.51787		0.00872598	0.919905	0.0186909	0.829434	0.0230465	0.790512	0.0416407	0.649761	0.084372	0.35702	0.0668676	0.465638	0.112072	0.22068
3750.36	0.0510856	0.552832	0.052817	0.53944	0.0673876	0.4335	0.0456334	0.615779	0.0684307	0.451487	0.125679	0.16581	0.145568	0.108106		-0.0594437	0.491335	-0.0633939	0.462956	-0.0708936	0.411657	-0.0741026	0.416739	-0.0926076	0.309872	-0.0875782	0.336968	-0.0764355	0.402191		0.106004	0.220785	0.114257	0.186758	0.0922983	0.286617	0.0993497	0.277861	0.0872714	0.340692	0.101694	0.266638	0.115967	0.204975
3776.82	-0.268318	0.00157676	-0.232396	0.00638754	-0.213858	0.0122266	-0.15844	0.0800885	-0.148018	0.10225	-0.137461	0.129364	-0.121526	0.180332		-0.0993035	0.249712	-0.0793712	0.357896	-0.0887935	0.303557	-0.0135053	0.882479	-0.0112253	0.902216	-0.0197177	0.829103	-0.0192815	0.832828		-0.115194	0.183154	-0.0929909	0.283005	-0.0654083	0.450541	-0.04958	0.588678	-0.00642867	0.944153	0.0205934	0.82237	0.0746308	0.415374
3822.48	-0.0618058	0.472609	-0.0507355	0.555559	-0.0374624	0.663462	-0.0136333	0.880883	-0.00654577	0.94266	-0.017019	0.851601	0.0270666	0.766033		0.0414293	0.631612	0.0360908	0.67621	0.0422022	0.62526	0.113492	0.212938	0.131045	0.15005	0.122031	0.180325	0.115759	0.203895		-0.0773827	0.37189	-0.0768364	0.375283	-0.0868403	0.316164	-0.0358082	0.696203	-0.0458407	0.617122	-0.0806666	0.378587	-0.0453733	0.620719
3846.45	-0.131606	0.125187	-0.122673	0.153102	-0.109886	0.200896	-0.0520695	0.566852	-0.0211012	0.816565	-0.00360501	0.968414	0.0488643	0.590987		0.0399122	0.64416	0.0160202	0.852968	0.00919803	0.91527	0.110762	0.224202	0.126022	0.166407	0.122857	0.177377	0.12242	0.178929		0.0339967	0.695116	0.0369086	0.670465	0.0161545	0.852298	0.028045	0.759783	0.0162986	0.858986	-0.0211286	0.817832	-0.00823737	0.928469
3894.16	0.0233819	0.78598	0.0113549	0.89511	0.0112523	0.896053	0.0174253	0.848099	-0.018412	0.839609	-0.0104797	0.908304	-0.0222105	0.807105		0.0648061	0.453035	0.0875292	0.310515	0.0693144	0.422172	0.0760787	0.404397	0.0616778	0.499227	0.0694036	0.446958	0.0377535	0.67931		0.0594722	0.492751	0.0190128	0.826542	0.00257048	0.976385	0.0417694	0.648751	0.0565438	0.537369	0.036533	0.690365	0.00294676	0.9744
3910.05	0.0837316	0.330236	0.0607977	0.479872	0.0737068	0.391551	0.154287	0.0884059	0.140099	0.12212	0.113593	0.210629	0.0950845	0.295059		0.0413339	0.632398	0.0436096	0.613763	0.042455	0.623187	0.0799978	0.380568	0.090572	0.320662	0.10034	0.271072	0.102362	0.261494		0.0749732	0.386998	0.0731685	0.398554	0.0741147	0.39247	0.0961252	0.293814	0.089202	0.330086	0.0569909	0.534152	0.0462268	0.614157
3955.91	0.048934	0.569695	0.0142718	0.868379	0.0148646	0.862964	0.00499155	0.956266	0.0314455	0.729544	0.0212238	0.815519	0.0539397	0.552989		0.0974953	0.258471	0.0513716	0.55209	0.0357473	0.67912	0.0105578	0.908006	0.00753748	0.93426	0.024344	0.789843	0.0672425	0.46126		0.0528631	0.542111	0.0275485	0.750821	0.023744	0.784325	-0.0138396	0.880092	0.0195028	0.831635	0.0441336	0.630303	0.0672334	0.463197
4020.4	-0.122263	0.15449	-0.123215	0.151287	-0.106516	0.21512	-0.0790523	0.384262	-0.0850241	0.349287	-0.0853788	0.347275	-0.0412738	0.649928		-0.114913	0.182584	-0.0901007	0.296472	-0.0668432	0.438936	0.00583238	0.949115	0.0241391	0.791571	0.0218128	0.811265	-0.0122563	0.893283		-0.0961077	0.267127	-0.0651741	0.452166	-0.0401327	0.643577	0.0452242	0.621868	0.0406178	0.657816	0.00800027	0.930524	0.0184325	0.840751
4059.15	-0.0870499	0.311379	-0.0505908	0.556688	-0.0415834	0.629068	-0.0208046	0.8191	-0.0301815	0.740019	-0.00929951	0.918596	0.0428151	0.637766		0.0951529	0.270128	0.0688374	0.425379	0.0542341	0.530134	0.0676655	0.458441	0.0894617	0.326648	0.125071	0.16965	0.16212	0.0744545		-0.101883	0.239338	-0.103951	0.229897	-0.0885962	0.30645	-0.121244	0.185005	-0.0775098	0.397573	-0.0593619	0.517257	0.0361943	0.693091
4096.65	0.0671215	0.435321	0.052467	0.542134	0.0531064	0.537218	0.0502702	0.580343	0.0495415	0.585849	0.0390038	0.668008	0.0724291	0.42544		0.101164	0.240916	0.0655265	0.44802	0.0482038	0.576893	0.068941	0.449999	0.0337022	0.712113	0.0210395	0.817838	0.0356783	0.696042		-0.0165984	0.848287	-0.0451663	0.602517	-0.0463906	0.59271	-0.00923994	0.919787	-0.0246647	0.788009	-0.0466807	0.610681	-0.0428804	0.640054
4127.87	0.0557526	0.517109	0.068769	0.424116	0.080502	0.349279	0.136932	0.130855	0.104906	0.247811	0.094517	0.297961	0.101508	0.263528		0.236606	0.00565094	0.231425	0.0068208	0.235881	0.00580306	0.24495	0.00666446	0.20722	0.0221682	0.150079	0.0989191	0.103611	0.255695		-0.0510584	0.556002	-0.0556775	0.520797	-0.0216272	0.803144	-0.0101545	0.911876	0.0148557	0.871359	-0.0225579	0.805743	0.010229	0.911232
4157.07	-0.0147619	0.863902	0.0166147	0.847014	0.0160733	0.851942	0.0398937	0.660896	0.0274987	0.762408	0.0329481	0.717157	0.0510119	0.574764		-0.0139879	0.871451	0.00955584	0.911986	0.0380087	0.660048	0.0961301	0.291767	0.129737	0.154189	0.164024	0.0710793	0.203757	0.024537		-0.0241879	0.780394	-0.0117501	0.892285	0.0107989	0.90096	0.0749153	0.413595	0.0887414	0.332597	0.0653434	0.475885	0.0733844	0.423224
4169.54	-0.121749	0.156239	-0.0985775	0.251438	-0.0875212	0.308758	-0.00663606	0.94187	-0.0221782	0.807379	-0.0210754	0.816786	0.022275	0.806556		0.0198702	0.818181	0.0221125	0.798079	0.0266447	0.757862	0.127615	0.161082	0.160911	0.0766657	0.17935	0.048195	0.239689	0.00796532		-0.0336016	0.698486	-0.0403131	0.642085	-0.0294069	0.734619	0.0176196	0.847688	0.0126948	0.889948	-0.0372781	0.684383	-0.0230186	0.801857
4214.6	0.0328514	0.702793	0.0286137	0.739652	0.0340975	0.69208	0.0121435	0.893821	-0.00464975	0.95926	-0.020121	0.824948	0.0139686	0.877975		0.146486	0.0888029	0.0985688	0.253246	0.0815705	0.344699	0.0899045	0.324252	0.0754112	0.408541	0.0811279	0.373859	0.0824959	0.365834		-0.074422	0.390506	-0.0930738	0.282574	-0.08964	0.300769	-0.0881994	0.335567	-0.0676805	0.460223	-0.0559883	0.541378	-0.000623222	0.994608
4220.51	-0.00797599	0.926222	0.00447104	0.958612	0.0238393	0.781897	0.0329352	0.717263	0.0360694	0.691663	0.0195728	0.829644	0.0543073	0.550283		0.146443	0.0888972	0.0930442	0.280923	0.0735366	0.394408	0.107055	0.24017	0.0922309	0.31185	0.0870627	0.339828	0.0902152	0.322578		-0.0430641	0.619523	-0.0584187	0.500456	-0.056136	0.517365	-0.0551958	0.547125	-0.0416542	0.649655	-0.0454139	0.620406	-0.000426771	0.996317
4272.51	0.0689184	0.423108	0.0771977	0.369463	0.0818601	0.341188	0.0559776	0.538073	0.0401001	0.659251	0.0309747	0.73344	0.060234	0.507578		0.133052	0.122453	0.0784409	0.363572	0.0579696	0.502158	0.0771295	0.397922	0.0605807	0.506902	0.0656828	0.471738	0.0899772	0.32386		-0.0745586	0.389635	-0.0982538	0.256554	-0.0863672	0.318815	-0.0837895	0.360359	-0.0604999	0.509246	-0.0558325	0.542506	0.013467	0.883297
4282.05	0.028119	0.743995	0.0429369	0.61794	0.0573627	0.505066	0.0487095	0.592164	0.048658	0.592557	0.0355148	0.696169	0.0699204	0.44168		0.109045	0.206064	0.0546253	0.527168	0.0361576	0.675644	0.0751534	0.410149	0.0600124	0.510902	0.0598075	0.512348	0.0998047	0.273647		-0.06275	0.469188	-0.0943615	0.275946	-0.0846698	0.328446	-0.0822991	0.368989	-0.0676941	0.460133	-0.0767037	0.402511	0.00256063	0.977758
4294.08	-0.0347555	0.686448	-0.0506982	0.55585	-0.023788	0.782355	-0.0258155	0.776557	-0.00490127	0.957056	-0.00629426	0.94486	0.0620268	0.495008		0.0882448	0.306564	0.0758886	0.379429	0.083288	0.334611	0.142961	0.116131	0.145314	0.110201	0.126551	0.164625	0.13694	0.132436		-0.0819042	0.344534	-0.0979514	0.258026	-0.0961272	0.267029	-0.0545387	0.551912	-0.0586845	0.522056	-0.101558	0.267278	-0.0223615	0.807402
4302	-0.0947178	0.270548	-0.108742	0.205644	-0.0652361	0.44835	0.0023539	0.979383	0.0264023	0.771616	0.0198824	0.826991	0.0825089	0.363766		0.065827	0.445937	0.0578217	0.503251	0.0633462	0.463293	0.138877	0.127011	0.133094	0.143738	0.0886224	0.331221	0.0999104	0.273137		-0.0755975	0.383048	-0.0767486	0.37583	-0.0723247	0.404027	-0.00402385	0.965038	-0.0292169	0.750069	-0.100088	0.274292	-0.0802601	0.381
4347.64	-0.111515	0.19427	-0.112336	0.190989	-0.0899528	0.295471	-0.0862171	0.342547	-0.0607112	0.504216	-0.031955	0.725337	-0.0354632	0.696589		0.109022	0.206164	0.0999428	0.246665	0.116211	0.177668	0.10336	0.256853	0.14801	0.103699	0.126829	0.163695	0.109626	0.229016		-0.0262999	0.761769	-0.0474734	0.584097	-0.0233928	0.787438	-0.0452175	0.62192	0.0217992	0.812155	0.0308156	0.736881	0.0851917	0.352355
4366.88	-0.0502922	0.559022	-0.028609	0.739693	-0.027965	0.745349	-0.0217397	0.811117	-0.0280275	0.757979	-0.0312327	0.731305	0.00345023	0.969771		0.0412099	0.633421	0.0375745	0.663693	0.0360384	0.676654	0.0892635	0.327725	0.130464	0.151879	0.167176	0.0657632	0.203327	0.0248455		-0.0216174	0.803231	-0.0295483	0.733391	-0.0115403	0.894197	-0.077503	0.397614	-0.0163325	0.858696	0.0385991	0.673826	0.138497	0.129662
4397.89	0.0463298	0.590426	0.00992215	0.908286	-0.0123164	0.886285	-0.130851	0.148967	-0.169423	0.0610961	-0.160123	0.0769023	-0.120487	0.184104		-0.00540528	0.950156	-0.0392252	0.649876	-0.0579362	0.502405	-0.0296906	0.745125	-0.0278996	0.760018	0.00819176	0.928566	0.0403442	0.658639		-0.0494586	0.568459	-0.079841	0.356855	-0.077412	0.371709	-0.10439	0.254115	-0.0606422	0.50825	-0.0159531	0.861945	0.0586235	0.522489
4465.04	0.0155179	0.857003	0.0105849	0.902188	-0.00131611	0.987827	-0.114709	0.20616	-0.163502	0.0708145	-0.165231	0.0678556	-0.194064	0.0316389		0.0396451	0.646381	0.0726826	0.399934	0.0810791	0.347621	0.0451621	0.620886	0.0291355	0.749731	0.0956146	0.294372	0.0979873	0.282512		-0.0378841	0.662283	-0.0275534	0.750778	-0.00855526	0.921467	-0.0151402	0.868917	0.036743	0.688677	0.0989432	0.279839	0.151599	0.0969132
4476.44	-0.0955766	0.266213	-0.0749202	0.383784	-0.0502642	0.559242	-0.0787814	0.385898	-0.0386942	0.670489	0.00482388	0.957734	0.0851014	0.348847		0.0925576	0.283455	0.126998	0.140527	0.154048	0.0733932	0.219545	0.0152639	0.264935	0.00327616	0.308415	0.000580123	0.323827	0.000294532		-0.0751585	0.385823	-0.0472734	0.585684	-0.0344113	0.691586	0.0221176	0.809462	0.0578851	0.527748	0.0416001	0.650081	0.0744547	0.416478
4530.89	-0.0449157	0.601825	-0.0288657	0.737442	-0.0423208	0.622995	-0.0991732	0.27471	-0.0932917	0.30429	-0.0623299	0.4929	-0.00589442	0.94836		-0.0180192	0.834866	-0.0134583	0.876279	-0.0380468	0.659728	-0.0163075	0.858323	0.00224373	0.980431	0.0462129	0.612777	0.073977	0.417531		0.0874695	0.31266	0.0835675	0.3348	0.0474246	0.584484	0.0306869	0.73794	0.0473987	0.605198	0.0724224	0.42934	0.119449	0.191632
4549.95	0.047814	0.578569	0.0629165	0.464676	0.0571387	0.506733	0.0246031	0.786795	0.00381783	0.966549	0.0127691	0.888385	0.00585572	0.948699		0.0298411	0.729878	0.0437861	0.612327	0.021416	0.80431	0.104933	0.249655	0.117708	0.196342	0.137846	0.129878	0.140258	0.123247		0.222871	0.00949467	0.239284	0.0052882	0.209619	0.0148213	0.213636	0.0187886	0.170261	0.0619664	0.145407	0.111465	0.11911	0.192901
4575.91	0.0211931	0.805598	0.0309706	0.719072	0.00823268	0.923854	-0.0846113	0.351638	-0.0838116	0.356221	-0.076937	0.397143	-0.129161	0.15432		-0.0148037	0.864023	0.0192548	0.82372	0.0153428	0.85912	0.0228371	0.802578	-0.0146553	0.872551	-0.0420559	0.645121	-0.103658	0.255482		0.0688177	0.427246	0.0954541	0.270405	0.0847966	0.32772	0.122057	0.18206	0.0953123	0.29793	0.0966671	0.291092	0.065418	0.475381
4595.62	-0.0382652	0.656704	-0.0179728	0.83468	-0.0331967	0.699818	-0.121829	0.179242	-0.0694819	0.444554	-0.0387845	0.669765	-0.0325289	0.720606		0.0218024	0.800851	0.0147894	0.864153	-0.00261915	0.975847	0.0377535	0.67931	0.0199028	0.827524	0.00107395	0.990648	-0.0242052	0.791013		0.00346795	0.968137	0.000970637	0.991096	-0.0131402	0.87963	0.0204986	0.823175	0.0434155	0.635883	0.0512668	0.576046	0.0922097	0.313989
4631.9	-0.0778464	0.365444	-0.0572414	0.505969	-0.0607417	0.480277	-0.112955	0.213218	-0.0971934	0.284442	-0.0610852	0.501589	0.009996	0.912521		-0.0556462	0.519467	-0.0564	0.513818	-0.0627785	0.467317	-0.0191758	0.833732	0.0115227	0.899638	0.0764818	0.401905	0.160111	0.0781567		-0.0765925	0.376804	-0.076295	0.378665	-0.073627	0.395599	-0.109938	0.229637	-0.0316962	0.729649	0.000460642	0.996022	0.0852662	0.351933
4648.29	-0.111095	0.195963	-0.127765	0.136666	-0.109279	0.203406	-0.128478	0.156527	-0.0623299	0.4929	-0.02252	0.80447	0.0669087	0.461632		0.0281141	0.744956	0.005744	0.947035	-0.00541005	0.950112	0.0553597	0.544249	0.0757746	0.406281	0.0648435	0.477429	0.0857145	0.34738		-0.142723	0.0986424	-0.166257	0.0540419	-0.174217	0.0434038	-0.125274	0.170741	-0.11955	0.191252	-0.141769	0.120779	-0.083532	0.361841
4674.52	-0.0223972	0.79479	-0.0384285	0.655332	-0.0298318	0.728991	-0.0729128	0.422349	-0.0695206	0.4443	-0.0510248	0.574667	-0.065793	0.469148		-0.0611612	0.478884	-0.0382425	0.658088	-0.0329564	0.702942	0.00115326	0.989955	0.00959286	0.916384	0.0422343	0.643718	0.0331074	0.716976		-0.036494	0.673954	-0.0089601	0.917763	-0.0159155	0.854459	0.075735	0.408492	0.0424265	0.643601	0.0758705	0.407653	0.0672809	0.462881
4689.22	0.0550199	0.522638	0.036263	0.67361	0.0353249	0.681588	-0.0414479	0.648549	-0.07744	0.394057	-0.0905896	0.318557	-0.150959	0.0955561		0.0132341	0.878324	0.0318687	0.712307	0.0343352	0.691136	-0.00576629	0.949691	-0.0324333	0.722501	-0.0251503	0.783051	-0.0591003	0.517354		0.0014145	0.987014	0.0253341	0.77027	0.0211492	0.807409	0.0656144	0.474055	0.0247527	0.78727	0.0383823	0.675554	-0.011997	0.895963
4714.76	0.0599063	0.486344	0.0604197	0.482611	0.0592576	0.491083	-0.0345281	0.704211	-0.0478002	0.599102	-0.0651546	0.473479	-0.118862	0.190125		0.0641525	0.457612	0.0713516	0.408637	0.071156	0.409925	0.0119589	0.895859	-0.00180093	0.984298	-0.0285605	0.754512	-0.081987	0.368807		-0.0219637	0.800144	0.00560433	0.948516	0.0101844	0.906571	0.0645576	0.481216	0.05063	0.5808	0.0235063	0.797747	-0.00879285	0.923658
4735.25	-0.119285	0.164839	-0.0998236	0.245473	-0.0839743	0.328833	-0.116199	0.2003	-0.046117	0.612039	-0.0303943	0.738252	-0.0208626	0.818604		0.0506989	0.557314	0.0389294	0.652343	0.0393159	0.649121	0.0356849	0.695989	0.0572234	0.530764	0.0511828	0.575072	0.0467284	0.608816		0.0217686	0.801883	0.041791	0.629921	0.0411716	0.635008	0.0169015	0.853826	0.0538748	0.556769	0.0314321	0.731816	0.0454816	0.619884
4777.99	-0.0340228	0.692721	-0.0375558	0.662674	-0.0470999	0.58426	-0.0861139	0.343127	-0.132276	0.144561	-0.109898	0.225926	-0.0579639	0.523729		0.00189876	0.982495	0.0107247	0.901269	0.0106579	0.901881	0.0550623	0.546417	0.0713136	0.434529	0.0949075	0.29797	0.0988134	0.278459		0.0377329	0.663548	0.0273876	0.75223	0.0169642	0.844985	0.0592332	0.518167	0.0454207	0.620354	0.0655873	0.474237	0.0978458	0.285227
4796.96	0.00794332	0.926523	0.032688	0.704201	0.0261168	0.761656	-0.0154454	0.865187	-0.0539268	0.553084	-0.0247578	0.785486	-0.0198759	0.827047		-0.0484089	0.575272	-0.0112447	0.896507	-0.0117504	0.89188	-0.0182506	0.841648	0.00129865	0.988685	0.0373371	0.682655	0.0784447	0.389907		-0.00422398	0.96119	0.0102819	0.90568	0.0111745	0.897533	0.00215418	0.981292	-0.0629048	0.492532	-0.0692521	0.449853	-0.0757553	0.408366
4824.05	-0.0418168	0.627144	-0.0315026	0.714454	-0.0153499	0.858535	-0.0207272	0.819762	-0.0150585	0.868534	0.00568805	0.950167	-0.0145361	0.873057		0.0267115	0.757274	0.0410954	0.634366	0.0423739	0.623852	0.00825785	0.927991	-0.0252428	0.782273	-0.0578182	0.526495	-0.0585782	0.521067		0.0323188	0.709469	0.0709297	0.413172	0.0620086	0.474463	0.0725918	0.428259	-0.00750576	0.93481	-0.0468432	0.609437	-0.0831933	0.363796
4857.3	0.0179962	0.834468	-0.00872739	0.919292	-0.0068699	0.936433	-0.0693465	0.445444	-0.0386362	0.670954	-0.0360823	0.691559	-0.040171	0.658686		0.0973856	0.259009	0.0711464	0.409988	0.0865226	0.316128	0.043034	0.637447	0.0980467	0.282219	0.120094	0.187378	0.117451	0.197329		-0.0498586	0.565332	-0.0543118	0.531086	-0.0440689	0.611369	0.0395746	0.66607	0.0782618	0.393	0.113054	0.216641	0.13784	0.131505
4895.14	-0.0344055	0.689442	-0.0273116	0.751102	-0.0387785	0.652397	-0.0337994	0.710172	-0.0716746	0.430288	-0.0868427	0.339046	-0.128078	0.157829		-0.0195124	0.8214	0.0332761	0.700199	0.0249845	0.772525	0.0625832	0.49294	-0.000789767	0.99313	-0.00326811	0.971487	-0.0392273	0.66752		0.0375037	0.665469	0.0796117	0.358241	0.0641937	0.459008	0.129034	0.158186	0.101504	0.267535	0.0716502	0.434286	0.0587725	0.521431
4944.47	-0.0948625	0.269814	-0.104197	0.225321	-0.113853	0.185038	-0.103126	0.255959	-0.118004	0.19336	-0.0988572	0.276248	-0.0959487	0.290677		-0.136759	0.11231	-0.0851295	0.324005	-0.087181	0.312449	-0.132413	0.145813	-0.166535	0.0668171	-0.149695	0.0997914	-0.13854	0.127943		0.0440201	0.611764	0.0522729	0.546635	0.072032	0.405935	0.139121	0.127933	0.158014	0.0834666	0.174001	0.0563903	0.0842162	0.357911
4968.66	0.00770064	0.928763	0.00118076	0.989081	-0.0153639	0.858407	-0.0274729	0.762624	-0.0676633	0.456587	-0.0952651	0.29414	-0.134765	0.137104		0.0501026	0.561964	0.0359048	0.677786	0.00403607	0.962777	-0.10457	0.251306	-0.086415	0.343443	-0.0458825	0.615322	-0.0379848	0.677454		0.0209589	0.809109	-0.00699932	0.93572	-0.011194	0.897355	-0.0707899	0.439835	-0.0475749	0.603856	0.00955155	0.91709	0.0142867	0.876248
4991.99	-0.0561166	0.514374	-0.0109722	0.898627	0.0032156	0.970233	0.0171351	0.8506	-0.0176768	0.845933	-0.0388619	0.669145	-0.0240098	0.791819		0.0607843	0.481601	0.0457469	0.596482	0.0184342	0.831118	0.0310058	0.734248	0.0470985	0.60598	0.0748824	0.411842	0.0725958	0.426297		0.059004	0.496167	0.0423227	0.62557	0.0356355	0.681201	0.0773269	0.39869	0.0732828	0.423867	0.0854559	0.35086	0.100765	0.271044
5072.87	0.0776318	0.366771	0.0648347	0.451152	0.0654741	0.446694	0.049793	0.583946	0.0725516	0.424656	0.0455947	0.616079	0.0698753	0.441975		0.0949907	0.270948	0.0437622	0.612521	0.0401937	0.641825	0.024767	0.786278	0.0908694	0.31907	0.106744	0.241543	0.119242	0.190546		-0.0991903	0.252031	-0.127861	0.139313	-0.135001	0.11841	-0.122836	0.17927	-0.0666712	0.466952	-0.0209524	0.819325	0.0782618	0.393
5143.88	-0.0277783	0.746991	0.0259348	0.763268	0.0462552	0.591026	0.0977222	0.28182	0.113471	0.211124	0.135823	0.134026	0.155286	0.0863436		0.0128858	0.881503	0.0254759	0.768177	0.0152712	0.859771	0.0428622	0.638793	0.073521	0.420413	0.112785	0.215817	0.147164	0.105706		-0.0490928	0.571326	-0.022671	0.793849	0.00572627	0.947397	0.0574787	0.530654	0.0938491	0.305435	0.116515	0.202829	0.157783	0.083922
5198.3	0.205822	0.0159625	0.149999	0.0802212	0.141724	0.0985085	0.0544105	0.549525	0.0768531	0.397659	0.0731836	0.420624	0.0882615	0.331191		0.161113	0.0610267	0.100048	0.246168	0.0902342	0.295755	0.0600322	0.510762	0.0339137	0.710387	-0.001107	0.990359	-0.0347861	0.703282		0.0704809	0.416139	0.0104087	0.904522	-0.0211687	0.807235	-0.00304837	0.973517	-0.0566861	0.536344	-0.0720295	0.431852	-0.134629	0.140802
5232.85	0.0249687	0.77184	0.00903541	0.916453	0.0119477	0.889668	0.00671989	0.941136	0.0251641	0.782053	0.0766468	0.39893	0.126595	0.162729		0.0334669	0.698563	-0.00123563	0.988616	-0.00230905	0.978709	0.101087	0.267508	0.0957931	0.293468	0.097485	0.284995	0.0948744	0.298138		0.0848405	0.327469	0.0498781	0.56518	0.00941859	0.913569	0.0311408	0.734208	0.0135957	0.88219	0.0143815	0.875433	-0.00131419	0.988598
5287.13	0.0386712	0.653296	0.0243807	0.777072	0.0271016	0.752954	0.0203016	0.823402	0.0453303	0.618128	0.00415963	0.963554	0.00162516	0.985774		0.115095	0.181891	0.0734889	0.394716	0.0667859	0.439328	0.0625964	0.492848	0.107973	0.236142	0.115204	0.206084	0.12743	0.161694		-0.0448542	0.605029	-0.0746903	0.388796	-0.0806555	0.351958	-0.107709	0.239263	-0.0512329	0.576298	-0.034433	0.707327	0.0180599	0.843929
5346.12	0.0995856	0.246605	0.0824995	0.337421	0.096272	0.262738	0.117759	0.194291	0.157756	0.0814125	0.124924	0.168382	0.124318	0.170469		0.0937837	0.277105	0.0307857	0.721674	0.0122418	0.887386	0.0444946	0.626061	0.0466623	0.609324	0.05074	0.578387	0.0511432	0.575368		0.0087211	0.919949	-0.000614574	0.99437	0.00370208	0.965985	-0.00816285	0.929115	0.0303888	0.740394	0.0696518	0.447237	0.0848191	0.354471
5411.87	0.036641	0.670405	0.0334114	0.697971	0.035969	0.676106	0.0322581	0.722837	0.0658704	0.468625	0.0572223	0.529062	0.0555842	0.540936		-0.137513	0.11033	-0.11498	0.182328	-0.0956825	0.267462	-0.0538	0.555663	-0.0629864	0.490154	-0.0750477	0.410809	-0.0443889	0.626882		0.0888157	0.305249	0.1008	0.244388	0.0858892	0.321509	0.124502	0.173408	0.13301	0.145675	0.100203	0.273738	0.0364382	0.691128
5435.13	-0.0679009	0.429999	-0.0545718	0.526034	-0.0275543	0.748964	0.0129174	0.887096	0.0237647	0.793896	0.0235712	0.795537	0.08218	0.365687		-0.0347836	0.687312	-0.0297887	0.730335	-0.0261009	0.762656	0.0476801	0.601534	0.0957667	0.293602	0.125071	0.16965	0.171412	0.0591351		0.0133938	0.877325	0.0217637	0.801926	0.02291	0.791725	0.0693605	0.449143	0.0852324	0.352125	0.0675518	0.461078	0.0801788	0.381484
5495.68	-0.112322	0.191045	-0.150722	0.078762	-0.144151	0.0928321	-0.116579	0.198823	-0.0895384	0.324222	-0.022204	0.80716	0.0420412	0.643861		0.0397643	0.645389	0.0117647	0.891749	-0.00487572	0.955036	0.0733558	0.421461	0.0713136	0.434529	0.105872	0.245428	0.133854	0.141449		-0.0854697	0.323885	-0.119744	0.166365	-0.122071	0.158239	-0.104044	0.255697	-0.0479407	0.601074	-0.0231405	0.800829	0.0327937	0.72067
5524.25	-0.0663562	0.440584	-0.0743648	0.387327	-0.0833116	0.332674	-0.0919245	0.311455	-0.0681018	0.453669	-0.0104345	0.908698	0.00456592	0.959994		-0.0439483	0.611009	-0.0255665	0.767375	-0.0434235	0.615277	-0.0661719	0.468439	-0.0958724	0.293068	-0.080011	0.380489	-0.0646783	0.478554		0.00242415	0.977731	-0.0151302	0.861568	-0.0374354	0.666042	-0.00286547	0.975107	0.00992413	0.913867	-0.0116515	0.898944	-0.022707	0.804485
5564.5	-0.0113503	0.895153	-0.00105009	0.990292	0.0127924	0.88192	0.0881583	0.331759	0.0957037	0.291915	0.0967677	0.286564	0.112413	0.215432		0.0208387	0.809483	0.0411097	0.634247	0.0379085	0.660888	0.107497	0.238222	0.128613	0.157812	0.126247	0.165648	0.114477	0.208975		-0.0854112	0.324217	-0.0638426	0.461473	-0.0731538	0.398648	-0.0205257	0.822945	-0.0191302	0.834806	-0.0218534	0.811696	0.00247934	0.978465
5641.55	0.146443	0.0877143	0.14809	0.0841763	0.147372	0.0857054	0.0506249	0.577671	0.10717	0.23771	0.124634	0.169378	0.163348	0.0710845		0.071509	0.407602	0.0170078	0.844015	0.0110539	0.898254	-0.0368018	0.686964	-0.00215121	0.981239	0.0142522	0.87603	0.0320566	0.725595		-0.119671	0.166626	-0.120642	0.163194	-0.121944	0.158674	-0.142081	0.119959	-0.166109	0.0686801	-0.114713	0.209937	-0.060859	0.506732
5715.06	-0.000560046	0.994832	-0.00224485	0.979224	-0.0101882	0.905838	-0.0459816	0.613085	-0.0391456	0.666872	-0.0176446	0.846211	0.0535786	0.555653		-0.0256333	0.766785	-0.00914079	0.915795	-0.00927437	0.914569	-0.041243	0.651526	0.0226323	0.804313	0.064784	0.477834	0.111093	0.222817		-0.137079	0.11281	-0.145859	0.0914004	-0.133777	0.121809	-0.12499	0.17172	-0.133525	0.144112	-0.109762	0.230388	-0.050779	0.579685
5738.97	0.133636	0.119429	0.126794	0.139691	0.111347	0.194946	0.0265894	0.770043	0.0554359	0.542018	0.070675	0.436759	0.110704	0.222524		0.093922	0.276395	0.0713182	0.408857	0.0646534	0.454102	0.0106503	0.907203	0.0871684	0.33924	0.1377	0.130286	0.155188	0.0878589		-0.0991611	0.252172	-0.112677	0.192957	-0.114004	0.187743	-0.179183	0.0493525	-0.170417	0.0617254	-0.105101	0.25088	-0.0243598	0.790568
5761.32	0.109979	0.200512	0.118366	0.168136	0.110217	0.199535	0.0327869	0.718483	0.0625492	0.491377	0.0701913	0.43991	0.10559	0.24473		0.123816	0.150808	0.0840895	0.329968	0.0728496	0.39885	0.0304374	0.738942	0.095304	0.295949	0.12367	0.17451	0.134614	0.139188		-0.129056	0.135631	-0.133075	0.123793	-0.130734	0.130588	-0.180639	0.0475115	-0.170919	0.0609551	-0.0976494	0.286199	-0.0114551	0.900639
5781.79	0.0277223	0.747484	0.0616891	0.473446	0.0694411	0.419593	0.0393456	0.665273	0.0833796	0.358712	0.093756	0.301881	0.139634	0.123372		0.149792	0.0817741	0.115071	0.181982	0.0984113	0.254008	0.0907967	0.319459	0.146285	0.107823	0.153727	0.0909151	0.161413	0.075741		-0.068725	0.42787	-0.0479319	0.580468	-0.040357	0.641722	-0.0767579	0.402178	-0.0924604	0.312671	-0.0629589	0.492159	-0.0107709	0.906548
5816.1	0.182818	0.0326231	0.192409	0.0244256	0.188036	0.0279131	0.10027	0.269419	0.139596	0.123477	0.132753	0.143108	0.147283	0.10398		0.103373	0.230758	0.0734841	0.394746	0.0531368	0.538499	0.0136507	0.881223	0.0542229	0.552557	0.0874394	0.337736	0.114985	0.206948		0.0252366	0.77113	0.0431226	0.619047	0.0569359	0.511407	0.0247731	0.787099	0.0296234	0.746709	0.0649505	0.478546	0.0729034	0.426275
5875.64	0.0461198	0.592113	0.020451	0.812277	0.00650587	0.939796	0.0160452	0.860004	0.0441114	0.627612	0.0338768	0.709538	0.0552618	0.543289		0.0713182	0.408857	0.00500453	0.953849	-0.0169601	0.844447	0.0226785	0.803921	0.0274634	0.763659	0.0472109	0.60512	0.070276	0.441256		0.0446005	0.607073	0.0115257	0.89433	-0.00492635	0.95474	-0.0360317	0.694401	-0.020607	0.822255	0.0155805	0.865139	0.0197466	0.829561
5914.63	0.115253	0.179666	0.0969253	0.259501	0.103637	0.227834	0.0940527	0.300349	0.131367	0.14736	0.098251	0.279215	0.1037	0.253312		0.0928772	0.28179	0.0318878	0.712142	0.0100997	0.906997	0.0363656	0.690484	0.0327902	0.719574	0.0396701	0.663994	0.0459618	0.614711		0.0243879	0.778625	0.0178324	0.837158	0.0157497	0.855959	0.0136228	0.881957	0.0434358	0.635724	0.0665222	0.46795	0.0604525	0.509579
5994.59	0.0958753	0.264717	0.119803	0.163002	0.13099	0.126976	0.0162774	0.857999	0.0324515	0.721243	0.0611046	0.501454	0.0878358	0.333536		0.126134	0.143263	0.126478	0.14217	0.103611	0.229679	0.00915006	0.920232	0.0190436	0.834862	0.0298228	0.744029	0.058717	0.520079		-0.0652375	0.451726	-0.0909472	0.293753	-0.101434	0.241422	-0.190503	0.0364911	-0.22203	0.0145343	-0.181358	0.046625	-0.109789	0.230272
6010.46	0.0380831	0.658234	0.0569614	0.508054	0.0587955	0.494474	-0.0105442	0.907742	-0.0119759	0.895279	-0.0113954	0.900329	0.0257768	0.776884		0.0632365	0.464069	0.0664281	0.441788	0.038376	0.65697	0.014847	0.870899	0.0501254	0.583003	0.0392603	0.667257	0.0558686	0.54055		0.0176763	0.838564	0.0139108	0.872628	-0.00989172	0.909245	-0.0594432	0.516683	-0.0703834	0.442471	-0.0554193	0.545501	-0.0174909	0.848787
6037	-0.0876706	0.307931	-0.0695251	0.41903	-0.0555333	0.518761	-0.0374108	0.680811	-0.0436148	0.631494	-0.0203338	0.823126	0.0599373	0.509674		0.101121	0.241117	0.0902295	0.29578	0.0721006	0.403726	0.10416	0.253176	0.128778	0.157275	0.139432	0.125488	0.136709	0.133096		0.0328602	0.704826	0.059043	0.495882	0.046015	0.595711	0.0630606	0.49146	0.0440726	0.630776	0.0212912	0.816455	0.0388565	0.671776
6083.39	-0.0228919	0.790361	-0.0355023	0.680077	-0.0423535	0.622726	-0.031323	0.730558	0.0155099	0.86463	-0.0144652	0.873671	-0.0370497	0.683726		0.00386909	0.964317	-0.0274319	0.75094	-0.0372788	0.666181	0.0671897	0.461613	0.12014	0.187207	0.158968	0.0803289	0.184392	0.0421618		0.0547508	0.527768	0.0387816	0.654791	0.0266072	0.75907	0.00850156	0.92618	0.0414984	0.650879	0.0549722	0.548751	0.067606	0.460718
6197.89	-0.128157	0.135459	-0.113503	0.186399	-0.110408	0.198752	-0.174737	0.0533314	-0.137345	0.12969	-0.0864364	0.341318	-0.0214301	0.813757		-0.0200563	0.816508	-0.00916941	0.915533	-0.0207576	0.810211	-0.0189048	0.836049	0.0447193	0.624317	0.0452216	0.620426	0.0751071	0.410437		-0.0855673	0.323331	-0.0635206	0.463739	-0.0613111	0.479455	0.00454545	0.960505	0.0484013	0.597579	0.0606354	0.508297	0.10758	0.239827
6281.8	-0.0668789	0.436986	-0.0660948	0.442389	-0.0806793	0.348216	-0.155338	0.0862382	-0.165302	0.0677364	-0.143085	0.114304	-0.152042	0.0931795		-0.0681933	0.42973	-0.0259434	0.764046	-0.0389581	0.652104	-0.0856946	0.347492	-0.118422	0.193628	-0.0862035	0.344629	-0.0647311	0.478194		-0.0195005	0.822164	-0.0175837	0.839399	0.000156082	0.998587	0.0188728	0.836998	0.0244005	0.790227	0.045231	0.621816	0.058278	0.524947
6310.96	-0.028035	0.744734	-0.00592716	0.945145	0.00447104	0.958612	-0.0300654	0.740984	-0.0254221	0.779875	0.0427958	0.637918	0.115773	0.201962		-0.0212919	0.805421	0.0157388	0.855523	0.017399	0.840474	-0.0176557	0.846745	-0.0125669	0.890595	-0.0203786	0.823466	0.00182737	0.984067		-0.0321481	0.710935	-0.0443859	0.608806	-0.0428056	0.621629	-0.00631351	0.945152	0.0471549	0.607057	0.0782821	0.392876	0.132739	0.146503
6334.65	0.0586462	0.495572	0.0316519	0.71316	0.0465725	0.58848	0.0157356	0.862678	0.0307361	0.735417	0.0935497	0.30295	0.12662	0.162643		0.0096608	0.911023	-0.00889271	0.918073	0.00291017	0.973162	-0.0592722	0.516135	-0.0927001	0.309387	-0.115237	0.205953	-0.104517	0.251547		-0.0102575	0.905903	-0.0283192	0.744088	-0.0360892	0.677368	-0.0111841	0.902979	-0.0158651	0.8627	0.00692996	0.939804	0.0191573	0.834575
6404.54	0.0653901	0.447278	0.0288471	0.737606	0.0109582	0.898755	-0.0528305	0.561191	-0.0938657	0.301314	-0.0723517	0.425936	-0.0515407	0.570801		-0.0137303	0.873799	0.00128811	0.988131	0.0144125	0.867583	-0.0750543	0.410768	-0.107345	0.23889	-0.09157	0.315342	-0.0758606	0.405748		0.0628183	0.468703	0.0388255	0.654425	0.0387328	0.655197	0.0292101	0.750125	-0.00587319	0.948974	0.0145644	0.873861	0.00900285	0.921839
6440.38	0.0880579	0.305792	0.0718119	0.403865	0.0789759	0.358513	-0.0160001	0.860394	-0.0583251	0.521143	-0.0294979	0.745704	-0.00731965	0.935891		0.0579696	0.502158	0.0601689	0.486057	0.0834741	0.333529	-0.0228305	0.802634	-0.0639248	0.483701	-0.0693243	0.447479	-0.0723314	0.427987		0.00603844	0.944532	-0.000546288	0.994998	0.0186372	0.829916	0.0513277	0.575592	0.0387549	0.672585	0.0626338	0.494401	0.0721176	0.431288
6538.22	-0.0325994	0.704967	-0.0518323	0.547037	-0.0853884	0.320731	-0.129535	0.153123	-0.157595	0.0817273	-0.126175	0.164134	-0.0841921	0.354035		0.0259959	0.763583	0.0320643	0.71062	0.0254473	0.76843	-0.00810585	0.929313	-0.0205769	0.821777	-0.0454066	0.618995	-0.0256261	0.77905		0.0404009	0.641359	0.00757487	0.930445	-0.00953566	0.912499	-0.0305921	0.738721	-0.0320959	0.726374	-0.0216095	0.813759	-0.0165492	0.85684
6639.12	0.121353	0.1576	0.111655	0.193708	0.0978308	0.255061	8.38374e-05	0.999293	-0.0381589	0.674787	0.00790651	0.930761	0.0490771	0.58937		0.10094	0.241965	0.10634	0.217592	0.111297	0.196809	0.0315543	0.729726	-0.0188652	0.836388	-0.0251899	0.782717	-0.0420163	0.645433		0.0476636	0.58259	0.0342698	0.692789	0.0348405	0.687938	0.103726	0.257161	0.090401	0.323606	0.123859	0.175655	0.118554	0.194996
6813.12	-0.0631172	0.463251	-0.0743975	0.387118	-0.0989182	0.249798	-0.207407	0.0214984	-0.219267	0.0149738	-0.147102	0.104408	-0.0658124	0.469017		0.083579	0.33292	0.0707695	0.412478	0.0520824	0.546597	-0.0407473	0.655445	-0.0974651	0.285094	-0.105792	0.245783	-0.0983706	0.280626		0.13028	0.131937	0.109804	0.204608	0.103127	0.233628	0.109883	0.229868	0.0945062	0.30205	0.142982	0.11761	0.127185	0.164272
6844.18	0.0632152	0.462556	0.044449	0.605609	0.0307979	0.720574	-0.0978512	0.281183	-0.126588	0.16275	-0.0676762	0.456501	-0.00225071	0.980288		0.150231	0.0808756	0.16087	0.0614221	0.152073	0.0771921	0.0669649	0.463116	0.00121274	0.989435	-0.00971843	0.915293	-0.0277938	0.7609		0.0911082	0.292897	0.0790752	0.361497	0.0750854	0.386287	0.100169	0.273901	0.0775505	0.397325	0.1	0.274716	0.0771643	0.399685
6858.71	0.00412101	0.961852	0.0253374	0.768566	0.047982	0.577234	0.034799	0.702	0.0434794	0.632554	0.08465	0.351417	0.133308	0.141433		0.150666	0.0799947	0.146773	0.0881758	0.138939	0.106658	0.0895609	0.326111	0.0543353	0.551733	0.0168957	0.853268	0.0196979	0.829272		0.0922934	0.286643	0.0977807	0.258859	0.0951761	0.271808	0.107357	0.24081	0.0908278	0.32132	0.0755656	0.409544	0.033234	0.717077
6886.64	-0.108444	0.206898	-0.060989	0.478488	-0.0305365	0.722848	-0.00209594	0.981645	0.0155486	0.864295	0.0297429	0.743665	0.0449433	0.621132		-0.0137589	0.873538	0.0208435	0.80944	0.0304232	0.724819	0.0186207	0.83848	0.0439064	0.630636	0.0371653	0.684037	0.0285605	0.754512		0.00653595	0.939968	0.0441176	0.610974	0.0636182	0.463051	0.113155	0.216226	0.107364	0.24078	0.0683647	0.455692	0.00972091	0.915625
6940.03	-0.0342002	0.6912	-0.0175855	0.838194	-0.0234286	0.785563	0.0232681	0.79811	0.0584798	0.520036	0.0697398	0.442862	0.113684	0.210265		-0.0210725	0.807387	-0.0504938	0.558911	-0.0318067	0.712842	0.0197376	0.828934	0.0930041	0.307798	0.146001	0.108514	0.170401	0.060665		-0.139781	0.10584	-0.13505	0.118276	-0.117325	0.175141	-0.0547216	0.550577	0.0411191	0.653863	0.110663	0.226566	0.211787	0.0198592
6951.83	-0.108579	0.206329	-0.0723813	0.400141	-0.0574001	0.504789	0.0396422	0.662903	0.096987	0.28547	0.105326	0.245918	0.144149	0.111614		0.000510472	0.99531	-0.018959	0.826385	-0.00910739	0.916102	0.0325985	0.721145	0.125798	0.167168	0.178206	0.0496585	0.219089	0.0154813		-0.130441	0.131457	-0.11136	0.198236	-0.101571	0.240787	-0.0183308	0.841617	0.0743734	0.416988	0.100345	0.273055	0.157377	0.0847305
6967.46	-0.103506	0.228423	-0.056742	0.509691	-0.0347509	0.686488	0.081103	0.372019	0.139099	0.124827	0.147921	0.102476	0.172608	0.056337		-0.0187109	0.828622	-0.0338677	0.695131	-0.0312867	0.717336	0.0215088	0.813848	0.122724	0.177846	0.164711	0.0698914	0.206189	0.0228519		-0.0889621	0.304451	-0.0657155	0.448412	-0.0609014	0.4824	0.0157025	0.864094	0.0886804	0.33293	0.0877523	0.338029	0.116834	0.201591
7072.29	-0.0520843	0.545088	-0.0291037	0.735357	-0.00581048	0.946223	-0.0023539	0.979383	0.0347216	0.702632	0.0749313	0.409592	0.149792	0.0981703		0.11156	0.195751	0.0564525	0.513426	0.0456658	0.597134	0.0877963	0.335762	0.0861573	0.344888	0.0635547	0.486241	0.0501188	0.583053		0.029002	0.738139	0.0317725	0.714164	0.0205151	0.813077	0.027564	0.763781	0.0784718	0.391728	0.066888	0.465502	0.064876	0.479052
7160.13	-0.0097168	0.910176	0.0129837	0.880167	0.0376864	0.661573	0.0462718	0.610844	0.056945	0.531063	0.0793683	0.38236	0.0961551	0.289637		-0.122728	0.15445	-0.0710558	0.410586	-0.0466199	0.589487	0.0109213	0.904852	0.0422079	0.643926	0.0644139	0.480357	0.112573	0.216683		-0.154209	0.0741702	-0.134372	0.120148	-0.112135	0.195115	-0.0150183	0.869963	-0.0447771	0.62532	-0.0550061	0.548505	-0.0252405	0.78318
7192.42	-0.0381532	0.657645	-0.011845	0.89061	0.00976814	0.909704	0.0347345	0.702526	0.0540558	0.552134	0.0779495	0.390946	0.0916601	0.312853		-0.139306	0.105728	-0.0966128	0.262822	-0.0751825	0.383889	-0.0311049	0.73343	0.0189577	0.835596	0.0404301	0.657958	0.0949141	0.297936		-0.0847234	0.328139	-0.062311	0.472307	-0.0451663	0.602517	0.00804769	0.930113	0.0170505	0.852551	0.00229644	0.980055	0.00723479	0.93716
7276.85	-0.12342	0.150603	-0.108229	0.207802	-0.110464	0.198523	-0.100702	0.267353	-0.0841986	0.353999	-0.0671344	0.46012	-0.0109763	0.903979		-0.00611612	0.943608	-0.0323744	0.707948	-0.0328992	0.703434	0.0400534	0.660947	0.0880673	0.334268	0.132512	0.145509	0.14197	0.118702		-0.0369135	0.670424	-0.0454395	0.600323	-0.0560043	0.51835	-0.0281737	0.758715	-0.0059477	0.948327	0.00862349	0.925124	0.0542813	0.553793
7304.93	-0.111687	0.193577	-0.105097	0.221319	-0.108318	0.207429	-0.0796069	0.380928	-0.0782977	0.388828	-0.0525532	0.563251	-0.0255059	0.779168		0.0501407	0.561666	0.0463003	0.592044	0.0623921	0.470067	0.123465	0.175229	0.188926	0.0372906	0.206731	0.0224903	0.211866	0.0193013		0.0111599	0.897666	0.00818457	0.924861	-0.000907229	0.991679	-0.0187644	0.837921	-0.00375288	0.967393	-0.0360317	0.694401	-0.0121393	0.894736
7366.93	-0.120947	0.159002	-0.140357	0.101826	-0.143237	0.0949403	-0.110059	0.225242	-0.124408	0.170157	-0.111362	0.219774	-0.108479	0.232002		-0.0278517	0.747256	0.00905491	0.916584	0.026702	0.757358	0.0751666	0.410066	0.0911206	0.31773	0.115957	0.203118	0.107471	0.238338		-0.117208	0.175575	-0.0841528	0.331417	-0.0911911	0.292456	-0.0385246	0.67442	-0.0262837	0.774453	-0.00791898	0.931228	0.0348869	0.703649
7454.89	-0.0333274	0.698693	-0.0299298	0.728136	-0.0587162	0.495057	-0.12277	0.175885	-0.129077	0.15459	-0.073893	0.416125	-0.0806968	0.374425		0.020624	0.811409	0.049387	0.567569	0.0432136	0.616988	0.0075507	0.934145	0.0122695	0.893169	0.0604618	0.507738	0.068941	0.449999		0.0630963	0.466735	0.0707394	0.414428	0.05478	0.527547	0.0824753	0.367963	0.107275	0.241168	0.15901	0.0815204	0.148259	0.104563
7480.5	-0.120237	0.161475	-0.0895607	0.297587	-0.0709905	0.409274	-0.055997	0.537932	-0.0582412	0.521742	-0.0311424	0.732052	0.0235777	0.795483		0.0320786	0.710496	0.021874	0.800211	0.021082	0.807302	0.0834476	0.360316	0.139789	0.124516	0.186131	0.0402347	0.212037	0.0192017		-0.110375	0.202254	-0.0917764	0.28936	-0.11513	0.183396	-0.0263853	0.773605	-0.0408413	0.656052	-0.0417559	0.648857	-0.0169896	0.853072
7576.15	-0.151997	0.0762441	-0.146111	0.0884401	-0.142508	0.0966453	-0.079968	0.378765	-0.10025	0.269512	-0.102037	0.261038	-0.122016	0.178571		-0.113578	0.187748	-0.106016	0.219005	-0.0931206	0.280528	-0.0843861	0.354925	-0.0556042	0.54247	-0.0364648	0.689683	-0.0512291	0.574726		-0.10937	0.206412	-0.0850063	0.326522	-0.0828114	0.339202	-0.0920336	0.314917	-0.0101477	0.911934	0.0352933	0.70036	0.119516	0.191378
7614.12	-0.124139	0.148226	-0.104267	0.225008	-0.112289	0.191175	-0.0753956	0.406689	-0.0548426	0.546355	-0.0326901	0.719279	-0.0331351	0.715621		-0.0143743	0.867931	-0.00661228	0.93904	0.0164782	0.848813	0.0859458	0.346077	0.0907042	0.319954	0.0918277	0.313977	0.0882126	0.333469		-0.0827285	0.339688	-0.0700566	0.418957	-0.0509999	0.556456	-0.0623764	0.49618	-0.0153164	0.867405	0.00352933	0.969336	0.0848665	0.354201
7664.51	-0.0186495	0.828548	-0.0482433	0.57516	-0.0851037	0.322351	-0.0959939	0.290449	-0.145355	0.108627	-0.152694	0.0917734	-0.196766	0.0293082		-0.10563	0.220696	-0.0718573	0.405317	-0.0699203	0.418119	-0.0923366	0.311294	-0.10151	0.265503	-0.0877831	0.335835	-0.0773806	0.396384		0.0817384	0.345514	0.07231	0.404122	0.0582236	0.50189	-0.00648286	0.943683	-0.0145644	0.873861	-0.0087251	0.924244	-0.00789188	0.931463
7682.03	-0.0734967	0.392904	-0.0891594	0.299764	-0.12104	0.158679	-0.0751699	0.408099	-0.0968967	0.28592	-0.104332	0.250418	-0.135881	0.133858		-0.0499261	0.563344	-0.0291494	0.735906	-0.035776	0.678878	-0.0574283	0.529292	-0.0700513	0.442721	-0.0701108	0.442333	-0.0646452	0.478779		0.101502	0.241104	0.0982782	0.256435	0.0728514	0.400605	0.0267443	0.770608	-0.00814253	0.929291	-0.0272185	0.766657	-0.0582374	0.525236
7707.89	-0.11621	0.176062	-0.119444	0.164274	-0.151978	0.0762805	-0.110485	0.223445	-0.134656	0.137426	-0.138203	0.127294	-0.121081	0.181942		0.00511426	0.952837	0.0140213	0.871146	0.00330137	0.969553	0.0353148	0.698989	0.0306291	0.737358	0.0354404	0.69797	0.0490349	0.591234		0.0750756	0.386349	0.0603697	0.486237	0.0277388	0.749157	-0.00848801	0.926298	-0.0400826	0.662045	-0.0577361	0.528813	-0.0795488	0.385245
7740.7	-0.138765	0.105797	-0.180531	0.034891	-0.218502	0.0104384	-0.212747	0.0183069	-0.179651	0.0468956	-0.135733	0.134286	-0.0647032	0.476555		0.0320166	0.711031	-0.0167454	0.846392	-0.0172177	0.842114	0.0318848	0.727007	0.102997	0.258537	0.164579	0.0701186	0.243437	0.0070178		0.0359184	0.678809	-0.0247537	0.775392	-0.0455126	0.599735	-0.077056	0.400349	-0.0689812	0.451632	-0.0257621	0.778813	-0.00267579	0.976756
7778.85	0.00408367	0.962197	-0.0260982	0.761822	-0.0279276	0.745678	-0.0565516	0.533908	-0.0106474	0.906843	0.0109182	0.904484	0.0778463	0.391575		0.0866609	0.315353	0.0359048	0.677786	0.014026	0.871103	0.0320632	0.72554	0.0437081	0.632181	0.0670046	0.46285	0.106526	0.24251		-0.00724807	0.93344	-0.0437665	0.613818	-0.0481416	0.578811	-0.0668609	0.465683	-0.0344466	0.707217	-0.0113535	0.901517	0.00397643	0.96545
7832.5	-0.253603	0.00286166	-0.24867	0.00346954	-0.21972	0.0100093	-0.205666	0.0226379	-0.148244	0.101723	-0.0999407	0.270999	0.000232165	0.997992		0.00844902	0.922149	-0.0402653	0.641231	-0.0534755	0.53591	0.0264192	0.772396	0.0578578	0.526212	0.0915634	0.315377	0.13318	0.143478		-0.0390401	0.652639	-0.0538045	0.534934	-0.0721003	0.40549	-0.0646728	0.480433	-0.0605406	0.508961	-0.0789798	0.388662	-0.0407872	0.656479
8153.91	-0.0135625	0.874867	-0.0208104	0.809041	-0.0142952	0.868166	-0.0263443	0.772104	-0.0295946	0.744899	-0.000773884	0.99324	0.0591505	0.515254		0.0836458	0.332533	0.0799342	0.354489	0.0668527	0.43887	0.145486	0.109777	0.134799	0.138641	0.145538	0.109647	0.146735	0.106736		-0.105292	0.223915	-0.126519	0.143536	-0.126027	0.145111	-0.0941946	0.303652	-0.0708508	0.439441	-0.0607573	0.507443	-0.0301111	0.742684
8211.97	-0.0644753	0.453669	-0.072106	0.40194	-0.0732447	0.394532	-0.0808515	0.373508	-0.142182	0.116625	-0.12239	0.177236	-0.151262	0.0948865		-0.0495015	0.56667	0.00524307	0.95165	0.0249559	0.772779	0.00152997	0.986665	-0.0408531	0.654608	-0.0233857	0.797936	-0.0585914	0.520973		0.107107	0.216001	0.124139	0.151268	0.147595	0.0875769	0.189114	0.0378984	0.179562	0.0488674	0.193951	0.0331866	0.155934	0.0876512
8271.1	-0.250406	0.00324346	-0.222348	0.00913643	-0.21349	0.0123795	-0.135146	0.13599	-0.125434	0.166642	-0.100502	0.268308	-0.0644194	0.478493		-0.0839464	0.330794	-0.0676256	0.433588	-0.0550976	0.523598	-0.0320566	0.725595	-0.00289141	0.974776	0.03472	0.70382	0.0594836	0.514637		-0.0205687	0.812597	-0.026217	0.762498	-0.0417959	0.629881	0.0275572	0.763838	0.0208373	0.820301	-0.00433546	0.96233	-0.060439	0.509674
8374.82	-0.0361883	0.674243	-0.0201757	0.814759	-0.0273909	0.750403	-0.0327675	0.718642	-0.0513923	0.571911	-0.0386233	0.671058	0.0146973	0.871661		0.139206	0.105981	0.103817	0.228755	0.0791374	0.359317	0.117735	0.196241	0.119413	0.189905	0.126492	0.164825	0.0901623	0.322863		-0.0229539	0.791335	-0.0559994	0.518386	-0.0948542	0.273438	-0.0366956	0.689058	-0.058488	0.523452	-0.0563677	0.538638	-0.00969381	0.91586
8449.83	0.102661	0.232259	0.100519	0.242187	0.10079	0.240917	0.0744476	0.412628	0.0796004	0.380966	0.0778334	0.391653	0.0896287	0.323733		0.182215	0.0338681	0.131964	0.12556	0.111917	0.194314	0.121647	0.181706	0.141917	0.118841	0.139822	0.124426	0.10985	0.228059		0.00624817	0.942608	-0.0286557	0.741154	-0.0562579	0.516455	0.00902317	0.921664	-0.0206883	0.821565	0.00103644	0.991014	0.0280924	0.75939
8534.07	-0.11263	0.189825	-0.114795	0.181408	-0.132656	0.122183	-0.197431	0.0287582	-0.198643	0.027777	-0.149392	0.0990786	-0.117295	0.196065		-0.240833	0.00483309	-0.164219	0.0561605	-0.143924	0.0945747	-0.176118	0.052427	-0.16368	0.0716793	-0.10605	0.24463	-0.0192287	0.83328		-0.0901522	0.298007	-0.091074	0.293078	-0.0734953	0.396446	-0.101213	0.268916	-0.0781669	0.393575	-0.0175247	0.848498	0.0474055	0.605146
8621.1	0.00924543	0.914518	0.00763063	0.929409	0.00521776	0.951704	0.0308715	0.734295	0.00948008	0.917021	-0.00220557	0.980684	-0.0276793	0.760895		-0.179214	0.0369554	-0.139783	0.10453	-0.128701	0.135248	-0.117041	0.198905	-0.0903143	0.322045	-0.0570846	0.531762	0.0325324	0.721687		-0.0177544	0.837861	0.0122134	0.888064	0.0237489	0.784281	0.0231337	0.800886	0.022944	0.802485	0.0154112	0.866592	0.0311679	0.733985
8696.5	-0.156505	0.0678525	-0.152851	0.074593	-0.154904	0.0707415	-0.180908	0.0453568	-0.190453	0.0349983	-0.171048	0.0586288	-0.167127	0.0647264		-0.180745	0.0353514	-0.138443	0.107924	-0.124293	0.149232	-0.144666	0.111809	-0.157263	0.0836584	-0.160812	0.0768493	-0.121145	0.183526		-0.163969	0.0574706	-0.142991	0.0980057	-0.137733	0.111092	-0.0963216	0.292825	-0.0888565	0.331968	-0.0720295	0.431852	-0.0439575	0.63167
8772.1	-0.0283803	0.7417	-0.0559486	0.515635	-0.0806187	0.348579	-0.12239	0.177236	-0.172654	0.0562718	-0.180928	0.0453335	-0.194026	0.0316734		-0.08127	0.346484	-0.0392443	0.649717	-0.0361338	0.675846	-0.0611887	0.502641	-0.0949273	0.297868	-0.111238	0.222209	-0.107451	0.238425		-0.00123403	0.988674	0.0148912	0.863733	0.00983806	0.909735	0.0150522	0.869673	-0.0393307	0.668006	-0.0523303	0.568147	-0.033234	0.717077
8778.88	-0.0447664	0.603035	-0.068223	0.427811	-0.0907182	0.291368	-0.130567	0.149856	-0.18018	0.0462433	-0.187364	0.0381065	-0.196999	0.0291149		-0.0941558	0.275197	-0.0513	0.552645	-0.0481227	0.577535	-0.0830445	0.362647	-0.110049	0.227216	-0.130232	0.152612	-0.120563	0.185651		-0.00929665	0.914684	0.00901863	0.917227	0.00552141	0.949277	0.0139615	0.879043	-0.0353543	0.699867	-0.0507519	0.579888	-0.0375491	0.682212
8820.79	-0.167286	0.0508089	-0.153299	0.0737385	-0.161681	0.0591638	-0.169629	0.0607782	-0.189711	0.0357242	-0.200668	0.0262019	-0.19745	0.0287423		-0.133219	0.121982	-0.0899528	0.297269	-0.0826535	0.338316	-0.125375	0.168609	-0.15799	0.0822256	-0.201946	0.0258599	-0.202078	0.0257613		-0.141435	0.101744	-0.117676	0.173847	-0.117867	0.173148	-0.0659667	0.471681	-0.0861401	0.347006	-0.139527	0.126814	-0.154478	0.0906804
8880.12	-0.0327534	0.703638	-0.0335374	0.696888	-0.0589542	0.493308	-0.0775883	0.39315	-0.113013	0.212981	-0.104681	0.248834	-0.106338	0.241388		-0.0898812	0.297654	-0.0497305	0.564875	-0.055713	0.518965	-0.0791452	0.385677	-0.0984499	0.280237	-0.116638	0.200464	-0.126769	0.163894		-0.106541	0.218447	-0.0932641	0.281588	-0.0862111	0.319693	-0.0397439	0.664728	-0.0709321	0.438915	-0.113074	0.216558	-0.147744	0.105784
8921.95	9.80081e-05	0.999113	-0.0199983	0.816359	-0.0446544	0.603943	-0.0904606	0.319249	-0.150714	0.0961003	-0.128807	0.155463	-0.151236	0.0949433		-0.0423453	0.624086	0.0108153	0.900439	0.0184676	0.830817	0.00319542	0.972121	-0.0389299	0.669893	-0.027926	0.759798	-0.0626559	0.492437		0.0343479	0.692125	0.0391133	0.65203	0.0478783	0.580892	0.0858353	0.34872	0.0446891	0.626001	0.0492548	0.591127	0.0261956	0.775189
8931.34	-0.020759	0.809503	-0.0164794	0.848246	-0.0296545	0.73054	-0.02815	0.756953	-0.083257	0.359421	-0.0595246	0.512598	-0.0870168	0.338076		-0.0435475	0.614267	6.20199e-05	0.999449	0.00223749	0.979369	-0.00686998	0.940073	-0.040668	0.656073	-0.0391348	0.668258	-0.067269	0.461084		0.0302166	0.727596	0.05538	0.52303	0.0653985	0.450608	0.113989	0.212847	0.0719753	0.4322	0.0687644	0.453057	0.0257011	0.779323
8981.6	-0.0834376	0.331942	-0.064452	0.453832	-0.0599903	0.485732	-0.00226361	0.980175	-0.0292464	0.747799	-0.0178574	0.844379	-0.0427055	0.638628		-0.0478794	0.579463	-0.0122895	0.88695	-0.0108678	0.899958	0.0263927	0.772617	0.0262738	0.773615	0.0281441	0.757979	0.0149197	0.870272		0.0392108	0.65122	0.0884889	0.307037	0.0988538	0.25365	0.113521	0.214738	0.0653299	0.475977	0.0295014	0.747717	0.0168947	0.853884
9068.72	0.0903728	0.293215	0.0432402	0.615458	0.00582448	0.946094	-0.0364112	0.688892	-0.0554294	0.542065	-0.0417897	0.645846	-0.0856819	0.345561		0.00191308	0.982363	0.0368303	0.66996	0.0337007	0.69656	0.0385862	0.672639	0.0177681	0.845782	0.0358039	0.695026	-0.00316898	0.972352		0.137231	0.112411	0.123944	0.151916	0.111721	0.196779	0.0804769	0.379712	0.0620715	0.49829	0.0908075	0.321429	0.044601	0.626682
9093.84	0.0625012	0.467634	0.0221545	0.796965	-0.0179542	0.834849	-0.0701655	0.440078	-0.116482	0.199198	-0.13472	0.137236	-0.180837	0.0454425		-0.0503077	0.560362	-0.00538142	0.950376	-0.0106293	0.902144	-0.0223877	0.806386	-0.05341	0.558535	-0.0465235	0.610389	-0.0754045	0.408583		0.119227	0.168213	0.114203	0.186966	0.0977709	0.258907	0.0637651	0.486625	0.0329766	0.719177	0.041993	0.646997	0.0027503	0.976109
9142.21	-0.00479306	0.955633	-0.0231346	0.78819	-0.0514916	0.549677	-0.0852433	0.348042	-0.122951	0.175247	-0.143568	0.113075	-0.191162	0.0343156		-0.0257621	0.765647	0.0128238	0.882069	0.00897858	0.917285	-0.014999	0.869588	-0.0446202	0.625086	-0.0629533	0.490382	-0.100717	0.26927		0.0721491	0.405171	0.0832797	0.336471	0.0702468	0.417692	0.0687441	0.453191	0.0281398	0.758996	0.005609	0.951268	-0.0549722	0.548751
9173.7	-0.101975	0.235407	-0.0880719	0.305715	-0.0933691	0.277453	-0.0433182	0.633818	-0.0524306	0.564162	-0.0739317	0.415881	-0.0995021	0.273116		-0.017294	0.841424	-0.000162206	0.998525	-0.00891179	0.917898	0.00932189	0.918739	-0.0212774	0.815814	-0.0711947	0.435297	-0.101199	0.266974		0.0799776	0.356031	0.102922	0.234562	0.0835431	0.334941	0.0791898	0.387399	0.0323872	0.723991	-0.0221582	0.809119	-0.0970126	0.289364
9300.17	0.0140712	0.870214	-0.0304945	0.723213	-0.0552952	0.520557	-0.129755	0.152424	-0.124518	0.169778	-0.108866	0.230334	-0.065103	0.47383		0.0355327	0.680942	0.0020228	0.98135	-0.0208816	0.809098	-0.0233064	0.798606	-0.0431001	0.63693	-0.0132344	0.884821	0.0121042	0.8946		0.00195591	0.982036	-0.0403034	0.642165	-0.0546873	0.528247	-0.0783092	0.392712	-0.0642596	0.483246	-0.0391478	0.669459	-0.0437	0.633669
9428.49	0.0177581	0.836627	0.00688857	0.936261	-0.0137445	0.873202	-0.0808193	0.373699	-0.135617	0.134622	-0.166624	0.0655449	-0.22362	0.0130551		0.0320786	0.710496	0.0673966	0.435149	0.0700014	0.417579	0.0157656	0.862985	-0.0163075	0.858323	-0.0361475	0.692246	-0.0816962	0.370512		0.0435518	0.615559	0.0631207	0.466562	0.0636036	0.463154	0.088423	0.334339	0.0536919	0.55811	0.0316759	0.729815	-0.0183647	0.841328
9443.22	-0.0347649	0.686368	-0.0315539	0.714009	-0.0374484	0.66358	-0.0539526	0.552894	-0.0918987	0.311591	-0.122216	0.177856	-0.178812	0.0479454		0.0390869	0.65103	0.0684318	0.428116	0.0719527	0.404693	0.0243704	0.78962	-0.00595795	0.948021	-0.0441575	0.628681	-0.0916823	0.314746		0.0257926	0.766231	0.062472	0.471162	0.0623646	0.471925	0.0939236	0.30505	0.0621596	0.49768	0.0212302	0.816971	-0.0439575	0.63167
9483.94	-0.115659	0.17813	-0.0915302	0.287057	-0.0707712	0.410726	-0.0140911	0.876913	-0.00214108	0.981249	-0.0347216	0.702632	-0.0662122	0.466316		-0.0262583	0.761268	-0.00932207	0.914131	0.0153332	0.859207	0.051738	0.570929	0.0676787	0.458353	0.00929546	0.918968	-0.0230486	0.800787		0.0565798	0.514055	0.0942542	0.276494	0.102205	0.237851	0.130192	0.154461	0.110737	0.226252	0.0420878	0.646254	-0.0278214	0.761641
9571.7	-0.00307092	0.971573	-0.015672	0.855599	-0.0427735	0.619279	-0.0882808	0.331085	-0.112233	0.216173	-0.113045	0.21285	-0.151391	0.0946026		-0.065765	0.446367	-0.0303516	0.725441	-0.040542	0.638939	-0.0579305	0.525691	-0.0625832	0.49294	-0.0604948	0.507505	-0.0757482	0.406445		0.130246	0.132039	0.149244	0.0840662	0.136718	0.113768	0.104613	0.253096	0.0837827	0.360398	0.075945	0.407191	0.0245495	0.788975
9594.14	-0.0264575	0.758642	-0.0316893	0.712836	-0.0528264	0.539368	-0.100212	0.269698	-0.12228	0.177626	-0.132038	0.145291	-0.169274	0.0613255		-0.0622919	0.470781	-0.0292639	0.734907	-0.0331091	0.701631	-0.0516917	0.571273	-0.053952	0.554546	-0.0513216	0.574035	-0.0634887	0.486695		0.094581	0.274827	0.11475	0.184855	0.105892	0.221276	0.0965655	0.291601	0.0803753	0.380315	0.0719076	0.432634	0.0225782	0.805571
9644.58	-0.0513049	0.551127	-0.0497928	0.562936	-0.0570034	0.507741	-0.0888741	0.327836	-0.13098	0.148564	-0.160046	0.0770465	-0.208033	0.0211013		-0.0158103	0.854873	0.0218024	0.800851	0.0251849	0.770751	0.0136772	0.880994	-0.000981426	0.991456	-0.0274832	0.763493	-0.0624444	0.493901		0.0753683	0.384496	0.103902	0.230116	0.104141	0.229042	0.132008	0.148757	0.110412	0.227625	0.084284	0.357524	0.0224631	0.806544
9720.2	-0.07296	0.396377	-0.056378	0.512414	-0.0475153	0.580947	-0.0677858	0.455771	-0.0828701	0.361664	-0.0958326	0.291263	-0.127065	0.161161		0.0519775	0.547406	0.0982921	0.254586	0.125299	0.145946	0.125018	0.169832	0.13392	0.141251	0.108502	0.233845	0.0681083	0.455501		0.0221295	0.798667	0.0480051	0.57989	0.0674178	0.436725	0.133336	0.144686	0.128905	0.158604	0.105142	0.250696	0.0575464	0.530169
9730.97	-0.0862611	0.315796	-0.0612597	0.476535	-0.0421575	0.624338	-0.0353085	0.697848	-0.0363919	0.689049	-0.0590989	0.515621	-0.093124	0.305163		0.0591813	0.493252	0.100305	0.244949	0.123887	0.150571	0.124826	0.170491	0.134178	0.140482	0.0969827	0.287494	0.0530069	0.561511		0.031753	0.714332	0.0672325	0.437989	0.0851478	0.325715	0.147792	0.105671	0.142054	0.12003	0.105589	0.248679	0.0429481	0.639526
9788.71	-0.117474	0.17138	-0.122543	0.153543	-0.115454	0.178906	-0.104339	0.250389	-0.13897	0.12518	-0.166088	0.0664251	-0.18975	0.035686		0.037627	0.663252	0.0698774	0.418406	0.0783073	0.364392	0.0458957	0.61522	0.031898	0.726898	-0.0125338	0.890881	-0.0637861	0.484653		0.13524	0.117755	0.162965	0.0590322	0.169466	0.0495184	0.169103	0.0637828	0.138254	0.130344	0.0873933	0.340015	-0.00787156	0.931639
9872.53	-0.104999	0.221752	-0.109802	0.201242	-0.110138	0.19986	-0.131825	0.145945	-0.164528	0.0690466	-0.175233	0.0526496	-0.212489	0.0184511		-0.0246171	0.775781	0.000734698	0.99324	0.00377845	0.965153	-0.0151245	0.868506	-0.0456181	0.617362	-0.0477264	0.601181	-0.0618166	0.498261		0.120437	0.163914	0.143708	0.09632	0.148449	0.0857448	0.147527	0.106301	0.117525	0.198924	0.0938762	0.305295	0.0231744	0.800543
9941.43	-0.0939711	0.274356	-0.0996089	0.246494	-0.112966	0.1885	-0.173892	0.0545083	-0.223762	0.0129963	-0.208826	0.0206068	-0.205479	0.0227634		-0.0625447	0.468979	-0.0474357	0.582985	-0.0440342	0.610312	-0.0876112	0.336785	-0.116988	0.199109	-0.120702	0.185142	-0.107227	0.239413		-0.0249585	0.773583	-0.0124622	0.885799	-0.0145449	0.866873	-0.0319875	0.727262	-0.101795	0.266159	-0.123784	0.175917	-0.143327	0.116719
10091.5	-0.0688624	0.423486	-0.0877079	0.307724	-0.102082	0.234912	-0.135739	0.134268	-0.163928	0.0700762	-0.14558	0.108074	-0.151933	0.0934178		-0.106431	0.217198	-0.131	0.128364	-0.137789	0.10961	-0.043761	0.631769	-0.074704	0.41296	-0.0730584	0.423349	-0.072946	0.424064		0.00427275	0.960742	0.0111843	0.897444	-0.00914057	0.916112	-0.00417288	0.963743	-0.0518493	0.571713	-0.0035632	0.969041	0.0229305	0.802599
10160.8	-0.185548	0.0300807	-0.204548	0.0166381	-0.22141	0.00944002	-0.215578	0.0167879	-0.254485	0.00460806	-0.241013	0.00737002	-0.239698	0.00770614		-0.11634	0.177185	-0.14215	0.098745	-0.158432	0.0655012	-0.115693	0.204155	-0.128375	0.158587	-0.123504	0.17509	-0.119361	0.190102		-0.0731148	0.398901	-0.0641742	0.459145	-0.0703883	0.416753	-0.0823466	0.368712	-0.0924333	0.312814	-0.0766292	0.402969	-0.0572619	0.532207
10223.1	-0.048682	0.571686	-0.0394179	0.647048	-0.0511369	0.552433	-0.0216688	0.811722	-0.0199727	0.826218	0.000367595	0.996804	-0.014936	0.869595		-0.0737894	0.392781	-0.0537951	0.533472	-0.0348504	0.686743	0.0194996	0.830965	0.0352223	0.699739	0.0698266	0.444188	0.0740695	0.416947		-0.00351673	0.967688	0.0158131	0.855386	0.0448249	0.605265	0.0637854	0.486485	0.0884298	0.334302	0.116251	0.20386	0.116109	0.204417
10273.5	-0.0346062	0.687724	-0.0219305	0.798975	-0.00701458	0.935097	0.0822768	0.365121	0.100876	0.266524	0.0952458	0.294238	0.0848306	0.350388		-0.00761414	0.929823	-0.000968465	0.991082	0.0117313	0.892054	0.103307	0.257098	0.127126	0.162703	0.123207	0.176137	0.13158	0.148381		0.0216906	0.802578	0.0472442	0.585916	0.066413	0.443603	0.0995394	0.276941	0.122619	0.180043	0.131412	0.150612	0.114842	0.209424
10355.4	-0.100701	0.241332	-0.0569614	0.508054	-0.0411867	0.632346	0.0138912	0.878646	0.0691336	0.446844	0.0830184	0.360803	0.0922857	0.309552		0.0412623	0.632988	0.07742	0.369865	0.104733	0.224657	0.129981	0.153409	0.214926	0.0175935	0.221614	0.0143111	0.213174	0.0185542		0.107092	0.216064	0.125407	0.14711	0.137352	0.11209	0.150874	0.0985347	0.169747	0.0627684	0.151585	0.0969434	0.113901	0.213202
10459.8	-0.168653	0.0489265	-0.18419	0.0313235	-0.19821	0.0203816	-0.231604	0.0100895	-0.240304	0.0075496	-0.2246	0.012654	-0.201777	0.0253719		-0.109551	0.203959	-0.0969133	0.261334	-0.102848	0.233144	-0.108205	0.235135	-0.107207	0.2395	-0.0779027	0.393198	-0.0559545	0.539927		-0.0686177	0.428593	-0.0680373	0.432516	-0.0747244	0.388579	-0.108549	0.235602	-0.12585	0.168771	-0.106761	0.243443	-0.0829901	0.364972
10639.5	-0.222492	0.00909038	-0.205122	0.0163307	-0.221718	0.00933936	-0.269428	0.00266157	-0.253653	0.00474691	-0.211232	0.019168	-0.180476	0.0458807		-0.145036	0.0920348	-0.166891	0.0522351	-0.185359	0.0308709	-0.196817	0.0299427	-0.162609	0.0735751	-0.0822316	0.367377	0.0212774	0.815814		0.0114818	0.894731	0.0232416	0.78878	-0.00194127	0.98217	-0.0418575	0.64806	-0.059538	0.516013	-0.0383756	0.675608	0.00808833	0.92976
10729.7	-0.125385	0.144173	-0.133347	0.120237	-0.152501	0.0752661	-0.137164	0.130199	-0.158014	0.0809108	-0.136094	0.133246	-0.0979028	0.280929		-0.120013	0.163827	-0.0815181	0.345011	-0.075526	0.381715	-0.0393264	0.66673	0.00700216	0.938922	0.0446532	0.62483	0.105032	0.249206		-0.0721003	0.40549	-0.0315628	0.71597	-0.0396254	0.647778	-0.0162715	0.859218	-0.00684867	0.940509	0.020966	0.81921	0.0827462	0.366387
11093.5	-0.0440056	0.609213	-0.0125264	0.884359	0.00882073	0.918432	0.092176	0.310129	0.115728	0.202139	0.149044	0.0998752	0.184101	0.0416392		0.116626	0.176116	0.0959496	0.266124	0.0909165	0.292107	0.11603	0.202833	0.177757	0.0502437	0.195456	0.0311145	0.203023	0.0250658		-0.0232416	0.78878	-0.0367184	0.672065	-0.0591308	0.495241	-0.0139547	0.879101	-0.0727815	0.427051	-0.100068	0.27439	-0.127578	0.162965
11156.8	-0.156038	0.0686847	-0.103366	0.229056	-0.092333	0.282837	-0.0106667	0.906675	-0.0241903	0.790289	-0.0325096	0.720765	-0.04366	0.631141		-0.107232	0.21374	-0.0752731	0.383315	-0.0778303	0.367328	-0.0201275	0.825607	0.0500395	0.583649	0.110749	0.224258	0.170547	0.0604431		0.0880548	0.309424	0.115989	0.180134	0.0957224	0.269056	0.0741973	0.418095	0.0291966	0.750238	-0.0200041	0.827374	-0.072646	0.427914
11533.1	-0.152869	0.0745572	-0.120629	0.160105	-0.124265	0.147812	-0.0542944	0.550378	-0.0551457	0.544137	-0.000296656	0.997426	0.0172447	0.849655		-0.0931683	0.28028	-0.0412003	0.6335	-0.0385907	0.655173	0.00728634	0.936447	0.0426904	0.640139	0.101926	0.26354	0.141567	0.119761		-0.059204	0.494707	-0.0420739	0.627604	-0.0428641	0.621152	-0.0422233	0.645192	-0.042142	0.645829	-0.0201599	0.82605	-0.012207	0.894152
11638.1	-0.109162	0.203891	-0.0810014	0.34629	-0.0890287	0.300475	-0.10993	0.225789	-0.102701	0.257934	-0.0579575	0.523776	-0.0461686	0.61164		-0.0540575	0.531475	-0.0120557	0.889087	-0.0272888	0.752197	-0.0120382	0.895172	0.00143083	0.987531	0.0598405	0.512114	0.094425	0.300441		0.121959	0.158623	0.128012	0.138843	0.0968198	0.263586	0.0455833	0.619102	0.0166238	0.856202	0.00407126	0.964626	-0.020336	0.824555
11686	-0.0961646	0.263272	-0.0764743	0.373975	-0.0939618	0.274404	-0.121048	0.182059	-0.143007	0.114501	-0.115586	0.202696	-0.0780526	0.390318		0.0146892	0.865064	0.0552216	0.522663	0.0471399	0.585339	0.0861969	0.344666	0.0696482	0.445356	0.0892965	0.327545	0.102666	0.260074		-0.0279387	0.74741	-0.00881865	0.919057	-0.0319871	0.712318	-0.0442826	0.629147	-0.0204647	0.823462	-0.0120512	0.895496	-0.0134873	0.883123
11734.9	-0.0126057	0.883632	-0.00244087	0.977408	-0.00529244	0.951013	-0.0617495	0.496942	-0.0885775	0.329458	-0.0918987	0.311591	-0.0638519	0.482383		0.0912075	0.29056	0.106774	0.215711	0.101589	0.23894	0.127807	0.16045	0.101021	0.267822	0.0937443	0.303951	0.0988596	0.278233		-0.008048	0.926111	-0.00068286	0.993742	-0.0207004	0.811419	-0.0358962	0.695493	-0.0200041	0.827374	-0.0547893	0.550083	-0.0670505	0.464417
11752.2	-0.0338688	0.694042	-0.0137725	0.872946	-0.00343028	0.968246	-0.0262089	0.773244	-0.046001	0.612936	-0.0577511	0.525257	-0.0358437	0.693496		0.0691141	0.423517	0.080187	0.352965	0.0779304	0.36671	0.106427	0.242951	0.102508	0.260814	0.0953635	0.295646	0.114648	0.208289		-0.00423861	0.961056	0.00964784	0.911473	-0.00434592	0.96007	-0.017816	0.84601	0.000657093	0.994314	-0.0597412	0.51458	-0.0817233	0.372357
12457.4	-0.195802	0.0219841	-0.165704	0.0530614	-0.16323	0.0567484	-0.089719	0.323245	-0.0854948	0.346618	-0.0390682	0.667492	0.0282339	0.756252		-0.0803158	0.35219	-0.0319403	0.71169	-0.00307237	0.971666	0.0824298	0.36622	0.125837	0.167034	0.176045	0.0525256	0.202296	0.0255994		-0.0931275	0.282296	-0.0545264	0.529463	-0.0353965	0.683223	-0.00465384	0.959564	0.065926	0.471954	0.0889852	0.331266	0.147236	0.106999
12866.4	-0.104757	0.222827	-0.0922536	0.283252	-0.0892574	0.299231	-0.0287691	0.75178	-0.0466136	0.608209	-0.0594343	0.513238	-0.0536108	0.555415		-0.0885645	0.30481	-0.0527408	0.541533	-0.0431039	0.617883	0.0115954	0.899008	0.00230982	0.979854	-0.0107296	0.906515	-0.0496562	0.586538		-0.0916594	0.289977	-0.0694176	0.42322	-0.0677885	0.434203	-0.0246715	0.787952	-0.0187238	0.838268	-0.0602357	0.5111	-0.0711083	0.437777
12992.2	-0.110828	0.197041	-0.0968647	0.2598	-0.0938871	0.274787	-0.0377333	0.678212	-0.031194	0.731625	-0.00111568	0.990242	0.0493222	0.58751		-0.140518	0.102706	-0.11114	0.197446	-0.0958113	0.266816	-0.0340591	0.709201	-0.0127916	0.88865	0.00342012	0.97016	-0.000624544	0.994573		0.0283875	0.743493	0.0427275	0.622265	0.0360501	0.677697	0.0707831	0.439879	0.0636499	0.487413	0.0503861	0.582625	0.0271305	0.76739
13357.3	-0.040076	0.641562	0.000662721	0.993881	0.000354696	0.996735	-0.0115567	0.898926	-0.00856432	0.925014	-0.0112858	0.901283	0.0100863	0.911733		0.0834264	0.333806	0.0814417	0.345464	0.0759649	0.378949	0.0320698	0.725486	0.0420096	0.645485	0.0587963	0.519514	0.105046	0.249147		-0.00825773	0.924191	0.0138084	0.873558	0.0136523	0.874976	0.020187	0.82582	0.0536038	0.558757	0.004559	0.960388	0.00143612	0.987537
13767.8	-0.0831529	0.333599	-0.0525837	0.541236	-0.0431422	0.616259	-0.00672634	0.94108	-0.0197856	0.82782	-0.0200952	0.825169	-0.0208884	0.818383		-0.148447	0.0845783	-0.097004	0.260887	-0.0708602	0.411878	-0.0351892	0.700008	-0.0194864	0.831078	0.00513183	0.955224	0.0073326	0.936044		-0.146825	0.0892578	-0.111799	0.196465	-0.09721	0.26166	-0.0150725	0.869498	-0.00587319	0.948974	-0.0198144	0.828986	-0.0281466	0.75894
13882.6	-0.116672	0.174341	-0.0882633	0.304662	-0.08018	0.351215	-0.0340122	0.708429	-0.0427893	0.637969	-0.0356632	0.694963	-0.0292399	0.747853		-0.160412	0.0621721	-0.106612	0.216413	-0.079147	0.359259	-0.037846	0.678567	-0.0186933	0.837858	0.0181977	0.842101	0.0203059	0.824086		-0.140177	0.10485	-0.0979807	0.257883	-0.0814603	0.347162	0.00142935	0.987596	0.0217857	0.812269	0.00978865	0.915039	8.80639e-05	0.999263
13909	-0.156174	0.0684425	-0.118188	0.168778	-0.100416	0.242671	-0.0224749	0.804854	-0.0272149	0.764788	-0.0261508	0.773732	-0.0226877	0.803043		-0.154549	0.0724542	-0.108058	0.210221	-0.0792138	0.358853	-0.0202993	0.824142	0.0163406	0.858039	0.0494579	0.588035	0.0507731	0.578139		-0.134567	0.119607	-0.0853331	0.32466	-0.0715003	0.409416	0.010947	0.905026	0.0258366	0.77819	-0.00696383	0.93951	-0.0280992	0.759333
14016.5	-0.0839043	0.329237	-0.0713732	0.406749	-0.0673456	0.433787	-0.0541009	0.551801	-0.0853465	0.347457	-0.117617	0.194832	-0.120075	0.18562		-0.139187	0.10603	-0.107566	0.212311	-0.0790325	0.359956	-0.0789073	0.387111	-0.0691789	0.448433	-0.063297	0.488013	-0.0650682	0.475902		-0.109058	0.207716	-0.0956102	0.26962	-0.0828114	0.339202	-0.0361536	0.693418	-0.0158244	0.863049	-0.0391478	0.669459	-0.0488687	0.594042
14040.8	-0.105774	0.218347	-0.0913529	0.287995	-0.0746542	0.385479	-0.0465814	0.608458	-0.0757052	0.404761	-0.113935	0.209253	-0.115231	0.204092		-0.132894	0.122899	-0.107242	0.213699	-0.0709604	0.411216	-0.0528417	0.562733	-0.0410381	0.653145	-0.0469069	0.607448	-0.0484137	0.595947		-0.145508	0.0921896	-0.122291	0.157488	-0.104839	0.225926	-0.0368311	0.68797	-0.00552093	0.952032	-0.0364923	0.690692	-0.0292982	0.749397
14063.2	-0.153952	0.0725066	-0.127943	0.136119	-0.0991142	0.248857	-0.0253705	0.780311	-0.0466201	0.60816	-0.0926081	0.307859	-0.0996505	0.272399		-0.134817	0.117538	-0.107299	0.213454	-0.0737751	0.392873	-0.0432323	0.635897	-0.0128973	0.887736	-0.0165521	0.856221	-0.00820498	0.928451		-0.156282	0.0703283	-0.123988	0.15177	-0.106863	0.217053	-0.0293524	0.748949	-0.000921284	0.992015	-0.0520322	0.570356	-0.0519848	0.570707
14144	-0.186281	0.0294278	-0.150055	0.0801075	-0.120237	0.161475	-0.0274213	0.763057	-0.0392553	0.665995	-0.0704363	0.438312	-0.0680824	0.453798		-0.145823	0.0902692	-0.117451	0.173061	-0.0861075	0.318462	-0.0498478	0.585093	-0.0181382	0.84261	-0.0152038	0.867823	0.000928554	0.991918		-0.113823	0.188446	-0.0781095	0.367405	-0.0650619	0.452946	0.00218805	0.980998	0.0220905	0.809691	-0.0396152	0.665748	-0.0570858	0.533471
14973	-0.164551	0.0547542	-0.146746	0.0870541	-0.162647	0.0576481	-0.158175	0.0805985	-0.195206	0.0306358	-0.181295	0.044892	-0.13948	0.123791		-0.0793903	0.35778	-0.0475598	0.581999	-0.032508	0.706798	0.00758374	0.933857	0.0589087	0.518716	0.0787949	0.387789	0.0866728	0.342001		-0.0431714	0.61865	-0.044264	0.609791	-0.0375963	0.664692	-0.0274895	0.764401	0.0320824	0.726485	0.0782888	0.392835	0.105345	0.249778
15134.2	-0.0956792	0.265698	-0.0760543	0.376611	-0.068223	0.427811	0.0386491	0.670851	0.0409191	0.65274	0.0381783	0.674631	0.0401904	0.658532		-0.134354	0.118811	-0.0991651	0.250375	-0.0634464	0.462585	-0.0216145	0.812949	0.000234617	0.997979	0.0202795	0.824311	0.0123091	0.892826		-0.13029	0.131908	-0.0909131	0.293935	-0.073905	0.393813	-0.0468703	0.60923	0.0206544	0.821853	0.0396626	0.665372	0.0700921	0.444365
15337.9	-0.150634	0.0789397	-0.122729	0.152914	-0.118296	0.168389	-0.00688112	0.939726	0.00633295	0.944522	0.0207465	0.819596	0.0494318	0.586679		-0.144516	0.0932161	-0.11154	0.195828	-0.0794714	0.357288	-0.0332859	0.715516	-0.0109345	0.904738	0.0130625	0.886307	0.02022	0.824818		-0.0833236	0.336216	-0.0444396	0.608372	-0.0247586	0.775349	-0.00701125	0.939099	0.04874	0.595015	0.0582374	0.525236	0.0900488	0.325501
15764.2	-0.123803	0.149333	-0.122631	0.153244	-0.142224	0.0973185	-0.115109	0.204576	-0.121287	0.181194	-0.102166	0.260434	-0.0758406	0.40392		-0.140141	0.103639	-0.0961309	0.265218	-0.078355	0.364099	-0.0466954	0.60907	-0.0276154	0.76239	-0.00480139	0.958106	-0.00856186	0.925346		-0.0844113	0.329929	-0.0599161	0.489524	-0.0563604	0.515691	-0.0394594	0.666984	0.0196789	0.830137	0.070695	0.440449	0.118148	0.19654
15878	-0.100715	0.241267	-0.0820841	0.339865	-0.0744115	0.387029	0.036695	0.686594	0.0409965	0.652126	0.0342895	0.706161	0.0322516	0.72289		-0.138638	0.107424	-0.103998	0.22794	-0.0698535	0.418565	-0.0367159	0.687657	-0.0180919	0.843007	-0.00112021	0.990244	-0.0111988	0.902445		-0.126256	0.144376	-0.0848795	0.327246	-0.064779	0.454916	-0.0409633	0.655091	0.016827	0.854463	0.0217924	0.812212	0.0417559	0.648857
16088	-0.135858	0.113366	-0.106745	0.214133	-0.0987175	0.250763	0.0197792	0.827875	0.0287562	0.751887	0.0353407	0.697586	0.0424411	0.640709		-0.161357	0.0606333	-0.131353	0.127331	-0.0975765	0.258073	-0.0604089	0.508109	-0.0373768	0.682336	-0.0119985	0.895515	-0.00926902	0.919198		-0.0943323	0.276095	-0.0527119	0.543268	-0.0347186	0.688974	-0.00781059	0.932168	0.0478594	0.601692	0.0546267	0.551269	0.0736418	0.421596
17406	-0.223664	0.00872506	-0.191498	0.0251188	-0.17297	0.0433608	-0.111149	0.220661	-0.101198	0.264992	-0.100753	0.267107	-0.0682759	0.452513		-0.0498402	0.564016	-0.021311	0.80525	-0.00989457	0.908879	-0.00361839	0.968429	-0.0419634	0.645848	-0.09843	0.280334	-0.109229	0.230712		-0.133377	0.122936	-0.0877768	0.310958	-0.0841528	0.331417	-0.0394256	0.667253	-0.0216163	0.813702	-0.0707966	0.439791	-0.0825362	0.367608
17617.4	-0.225587	0.00815356	-0.191821	0.0248716	-0.175836	0.0399674	-0.0805226	0.37546	-0.0571642	0.52948	-0.0308135	0.734776	0.00118017	0.989676		-0.0697963	0.418947	-0.0528505	0.540691	-0.0308239	0.721343	-0.0159903	0.861051	-0.0219053	0.810479	-0.0604155	0.508063	-0.0708047	0.437821		-0.0793825	0.35963	-0.0348503	0.687855	-0.0278412	0.748262	0.00477578	0.958504	0.023635	0.796663	-0.0165763	0.856608	-0.0255792	0.780344
number of significant correlations (p<0.05)		12		10		11		9		15		11		24			5		1		2		3		4		8		15			1		1		3		5		2		2		1

## Sheet: Table_S3
Table S3. Serum proteins quantified in samples of patients with prostate cancer undergoing radiotherapy
Protein short name	Protein ID	Protein name	Gene name	Sample B	Sample C	Sample D	B/C ratio	BDC p-value	C/D ratio	CDD p-value	B/D ratio	BDD p-value	Change BDC/CDD
A1AG1	P02763	Alpha-1-acid glycoprotein 1	ORM1	19009.5	22313	21733.7	0.851946	0.350656	1.02665	0.757634	0.874654	0.226789	n
A1AG2	P19652	Alpha-1-acid glycoprotein 2	ORM2	8097.86	8478.2	7990.2	0.955139	0.736875	1.06107	0.525653	1.01347	0.912975	n
A1AT	P01009	Alpha-1-antitrypsin	SERPINA1	797.499	853.933	963.605	0.933913	0.605361	0.886186	0.881293	0.82762	0.411465	n
A1BG	P04217	Alpha-1B-glycoprotein	A1BG	8135.44	7972.37	8319.86	1.02046	0.681322	0.958233	0.522211	0.977834	0.859754	n
A2AP	P08697	Alpha-2-antiplasmin	SERPINF2	984.706	868.635	855.456	1.13362	0.940481	1.01541	0.904911	1.15109	1	n
A2GL	Q68CK4	Leucine-rich alpha-2-glycoprotein	LRG1	928.906	1407.18	1192.09	0.66012	0.052222	1.18043	0.433048	0.779225	0.0346581	u/n
A2MG	P01023	Alpha-2-macroglobulin	A2M	92552.4	83289.1	82878.9	1.11122	1	1.00495	0.958584	1.11672	0.455273	n
AACT	P01011	Alpha-1-antichymotrypsin	SERPINA3	7165.9	9000.82	8534.89	0.796138	0.052222	1.05459	0.46271	0.839601	0.139164	n
AFAM	P43652	Afamin	AFM	3822.28	3712.57	3715.52	1.02955	0.765198	0.999207	0.991405	1.02873	0.80073	n
ALBU	P02768	Serum albumin	ALB	1262980	1275839	1.30024e+06	0.989921	0.681322	0.98123	0.617315	0.97134	0.611278	n
ALS	P35858	Insulin-like growth factor-binding	IGFALS	378.991	384.557	338.791	0.985529	0.550292	1.13508	0.405776	1.11866	1	n
AMBP	P02760	Protein AMBP	AMBP	2577.8	2576.76	2667.71	1.0004	0.995537	0.965909	0.666738	0.966296	0.73409	n
ANGT	P01019	Angiotensinogen	AGT	2976.47	3191.98	3200.48	0.932484	0.32222	0.997344	0.976889	0.930007	0.479332	n
ANT3	P01008	Antithrombin-III	SERPINC1	3272.14	3106.99	3331.37	1.05315	0.717801	0.932648	0.435197	0.982219	0.501591	n
APOA1	P02647	Apolipoprotein A-I	APOA1	129881	131458	132328	0.988	0.390533	0.99343	0.901772	0.981509	0.788113	n
APOA2	P02652	Apolipoprotein A-II	APOA2	14744.4	13055.5	12175.5	1.12936	0.1454	1.07228	0.550292	1.211	0.0498867	d/d
APOA4	P06727	Apolipoprotein A-IV	APOA4	9528.52	7996.41	8021.77	1.1916	0.627446	0.996839	0.981982	1.18783	1	n
APOB	P04114	Apolipoprotein B-100	APOB	45937.4	42277.8	45251.7	1.08656	0.708905	0.934281	0.433048	1.01515	0.888088	n
APOC1	P02654	Apolipoprotein C-I	APOC1	2668	2653.11	2715.62	1.00561	0.962867	0.976979	0.331723	0.982463	0.736875	n
APOC2	P02655	Apolipoprotein C-II	APOC2	1017.34	1022.2	1106.85	0.995245	0.978009	0.923529	0.577758	0.919137	0.609592	n
APOC3	P02656	Apolipoprotein C-III	APOC3	3924.5	4017.67	4325.89	0.97681	0.232226	0.928751	0.654159	0.907213	0.343425	n
APOD	P05090	Apolipoprotein D	APOD	1323.72	1246.45	1339.74	1.06199	0.61352	0.930373	0.508124	0.988044	0.925903	n
APOE	P02649	Apolipoprotein E	APOE	3495.78	3365.64	3540.72	1.03867	0.765198	0.950554	0.526404	0.987309	0.681322	n
APOH	P02749	Beta-2-glycoprotein 1	APOH	5808.97	5871.77	5793.02	0.989303	0.915658	1.01359	0.871047	1.00275	0.981044	n
APOL1	O14791	Apolipoprotein L1	APOL1	483.5	371.81	440.509	1.30039	0.478125	0.844048	0.296869	1.0976	0.65279	n
APOM	O95445	Apolipoprotein M	APOM	368.555	361.287	453.697	1.02012	0.844653	0.796317	0.0804712	0.812338	0.160363	n
ATRN	O75882	Attractin	ATRN	170.731	126.791	186.939	1.34656	0.100458	0.678246	0.0498419	0.913299	0.69872	d/u
C1QB	P02746	Complement C1q subcomponent subunit...	C1QB	211.709	250.624	214.56	0.844727	0.480528	1.16809	0.413707	0.986714	0.960952	n
C1QC	P02747	Complement C1q subcomponent subunit…	C1QC	445.06	384.931	379.076	1.15621	0.654159	1.01544	0.911463	1.17407	0.466533	n
C1R	P00736	Complement C1r subcomponent	C1R	416.503	408.399	364.718	1.01984	0.945458	1.11977	0.626598	1.14198	0.910825	n
C1S	P09871	Complement C1s subcomponent	C1S	438.204	412.997	373.895	1.06104	0.835225	1.10458	0.724499	1.172	0.601213	n
C4BPA	P04003	Complement component 4 binding protein	C4BPA	5571.84	5295.24	5965.64	1.05223	0.737268	0.887623	0.340776	0.933988	0.677369	n
CBG	P08185	Corticosteroid-binding globulin	SERPINA6	450.01	381.725	444.798	1.17888	0.268735	0.858199	0.217957	1.01172	0.927217	n
CD5L	O43866	CD5 antigen-like	CD5L	668.982	621.558	643.077	1.0763	0.440448	0.966539	0.708905	1.04028	0.683823	n
CERU	P00450	Ceruloplasmin	CP	15322.5	15686.4	15686.5	0.976806	0.816797	0.999993	0.999901	0.976798	0.232226	n
CFAB	P00751	Complement factor B	CFB	5525.3	5548.48	5641.05	0.995822	0.974857	0.983589	0.7915	0.97948	0.411465	n
CFAI	P05156	Complement factor I	CFI	901.938	904.741	885.136	0.996902	0.98105	1.02215	0.759169	1.01898	0.884199	n
CHLE	P06276	Cholinesterase	BCHE	48.2539	38.8523	39.8066	1.24198	0.146524	0.976026	0.892772	1.21221	0.30404	n
CLUS	P10909	Clusterin	CLU	4723.44	5096.66	4847.47	0.926771	0.346434	1.05141	0.851925	0.974413	0.754434	n
CO2	P06681	Complement C2	C2	94.0192	95.8855	93.1686	0.980536	0.889581	1.02916	0.85972	1.00913	0.965685	n
CO3	P01024	Complement C3	C3	73918.2	75899.3	77348.4	0.973899	0.784272	0.981265	0.753323	0.955653	0.232226	n
CO4A	P0C0L4	Complement C4-A	C4A	17192.4	18777	18423	0.915613	0.511016	1.01921	0.79288	0.933203	0.0859239	n
CO4B	P0C0L5	Complement C4-B	C4B	607.904	740.822	665.08	0.820582	0.090277	1.11388	0.369376	0.914033	0.545692	n
CO5	P01031	Complement C5	C5	2502	2856.51	2902.26	0.875892	0.353246	0.984236	0.864861	0.862085	0.1454	n
CO6	P13671	Complement component C6	C6	676.878	886.609	858.344	0.763446	0.0841656	1.03293	0.785373	0.788586	0.0333402	u/n
CO7	P10643	Complement component C7	C7	561.377	550.627	558.005	1.01952	0.869839	0.986778	0.87002	1.00604	0.968497	n
CO8A	P07357	Complement component C8 alpha chain	C8A	293.557	272.762	280.6	1.07624	0.793839	0.972067	0.775119	1.04618	0.350656	n
CO8B	P07358	Complement component C8 beta chain	C8B	342.533	287.673	298.426	1.1907	0.765198	0.963969	0.75878	1.1478	0.765198	n
CO8G	P07360	Complement component C8 gamma chain	C8G	339.912	332.892	339.25	1.02109	0.827831	0.981257	0.765198	1.00195	0.984189	n
CO9	P02748	Complement component C9	C9	1420.4	1797.83	1660.61	0.790062	0.247145	1.08263	0.498949	0.855345	0.196263	n
CPN2	P22792	Carboxypeptidase N subunit 2	CPN2	272.336	294.18	246.876	0.925747	0.82276	1.19161	0.765198	1.10313	0.602884	n
CXCL7	P02775	Platelet basic protein	PPBP	1048.88	627.418	707.633	1.67175	0.167184	0.886644	0.253721	1.48224	0.550292	n
F13B	P05160	Coagulation factor XIII B chain	F13B	149.688	110.886	117.802	1.34992	0.411465	0.941291	0.762891	1.27067	0.313463	n
FBLN1	P23142	Fibulin-1	FBLN1	111.995	111.67	121.896	1.00291	0.390533	0.916111	0.498838	0.918777	0.612979	n
FCN3	O75636	Ficolin-3	FCN3	328.559	243.117	258.642	1.35145	0.220058	0.939975	0.767967	1.27032	1	n
FETUA	P02765	Alpha-2-HS-glycoprotein	AHSG	7719.4	6814.71	6967.04	1.13276	0.345447	0.978136	0.837007	1.10799	0.389378	n
FHR1	Q03591	Complement factor H-related protein...	CFHR1	192.325	230.377	219.346	0.834828	0.82276	1.05029	0.789361	0.876811	0.394831	n
FIBA	P02671	Fibrinogen alpha chain	FGA	162.179	176.149	137.368	0.920692	0.601213	1.28231	0.347595	1.18062	0.525653	n
FINC	P02751	FN1 protein	FN1	9369.8	7755.56	8183.43	1.20814	0.601213	0.947715	0.501591	1.14497	0.708905	n
GELS	P06396	Gelsolin (AGEL) (Actin-depolymerizing factor) (ADF) (Brevin)	GSN	2013.54	1809.5	1763.51	1.11276	0.515164	1.02608	0.851925	1.14178	0.940481	n
HABP2	Q14520	Hyaluronan-binding protein 2	HABP2	144.654	116.327	140.018	1.24351	0.550292	0.8308	0.575486	1.03311	0.898556	n
HBA	P69905	Hemoglobin subunit alpha	HBA1	8113.52	8131.98	4614.59	0.997731	0.993486	1.76223	0.0893598	1.75823	0.125859	n
HBB	P68871	Hemoglobin subunit beta	HBB	10076.9	11370.7	5735.51	0.886217	0.66144	1.98251	0.0186749	1.75693	0.052222	u/d
HEMO	P02790	Hemopexin	HPX	27758.9	30560	31063.2	0.908342	0.299195	0.983801	0.833271	0.893628	0.266146	n
HEP2	P05546	Heparin cofactor 2	SERPIND1	2774.82	2730.33	2840.9	1.01629	0.85081	0.961079	0.692279	0.976738	0.83919	n
HPRG	P04196	Histidine-rich glycoprotein	HRG	3874.97	3953.26	3808.22	0.980199	0.681322	1.03808	0.602495	1.01753	0.873426	n
HF	Q14006	HF protein (Fragment)	HF	14632.2	14626.5	15142.1	1.00039	0.997039	0.965948	0.615865	0.966326	0.331723	n
HPT	P00738	Haptoglobin	HP	31250.7	38772.8	37830.9	0.805996	0.167184	1.02489	0.814619	0.826061	0.256107	n
HPTR	P00739	Haptoglobin-related protein	HPR	15307.4	17825.6	16115.7	0.858734	0.3516	1.1061	0.275579	0.949847	0.313463	n
IC1	P05155	Plasma protease C1 inhibitor	SERPING1	5336.84	5595.14	5715.19	0.953835	0.716624	0.978994	0.789676	0.933798	0.178956	n
ITIH1	P19827	Inter-alpha-trypsin inhibitor heavy chain H1 (ITI heavy chain H1) (ITI-HC1) (Inter-alpha-inhibitor heavy chain 1) (Inter-alpha-trypsin inhibitor complex component III) (Serum-derived hyaluronan-associated protein) (SHAP)	ITIH1	5258.75	5284.77	5498.93	0.995077	0.525653	0.961054	0.510516	0.956323	0.217957	n
ITIH2	P19823	Inter-alpha-trypsin inhibitor heavy...	ITIH2	9029.67	9657.01	10184	0.935037	0.541126	0.948254	0.542912	0.886653	0.384643	n
ITIH3	Q06033	Inter-alpha-trypsin inhibitor heavy...	ITIH3	174.354	221.441	224.139	0.787364	0.339034	0.987962	0.937166	0.777886	0.170739	n
ITIH4	Q14624	Inter-alpha-trypsin inhibitor heavy...	ITIH4	6300.19	6455.44	6477.36	0.975949	0.839866	0.996616	0.964178	0.972646	0.262722	n
KAIN	P29622	Kallistatin	SERPINA4	472.382	392.327	390.548	1.20405	0.627446	1.00456	0.964445	1.20953	0.708905	n
KLKB1	P03952	Plasma kallikrein	KLKB1	376.481	361.478	365.137	1.04151	0.708905	0.989977	0.907129	1.03107	0.97022	n
KNG1	P01042	Kininogen-1	KNG1	6539.81	6254.86	6988.13	1.04556	0.771183	0.895069	0.304808	0.935845	0.116888	n
LBP	P18428	Lipopolysaccharide-binding protein	LBP	44.8885	95.7023	55.2032	0.469043	0.00999639	1.73364	0.00282086	0.813149	0.432601	u/d
LUM	P51884	Lumican	LUM	422.401	408.305	367.692	1.03452	0.816312	1.11046	0.370185	1.14879	0.300185	n
MMGL	E9PJU0	Phosphodiesterase 4D interacting protein	PDE4DIP	36.352	46.5813	44.7103	0.7804	0.390533	1.04185	0.747596	0.813058	0.0678385	n
PEDF	P36955	Pigment epithelium-derived factor	SERPINF1	547.803	483.743	477.83	1.13243	0.527107	1.01238	0.94334	1.14644	0.940481	n
PGRP2	Q96PD5	N-acetylmuramoyl-L-alanine amidase	PGLYRP2	996.054	886.52	954.051	1.12355	0.322458	0.929217	0.404202	1.04403	0.654159	n
PLF4	P02776	Platelet factor 4	PF4	495.579	213.149	224.619	2.32504	0.00718917	0.948935	0.765415	2.20631	0.0152401	d/n
PLMN	P00747	Plasminogen	PLG	8355.83	7958.02	8477.08	1.04999	0.675846	0.938768	0.42715	0.985696	0.525653	n
PON1	P27169	Serum paraoxonase/arylesterase 1	PON1	1549.6	1437.85	1502.09	1.07772	0.328237	0.957227	0.503328	1.03163	0.97022	n
PROS	P07225	Vitamin K-dependent protein S	PROS1	671.047	600.49	621.331	1.1175	0.603416	0.966457	0.840205	1.08002	0.881293	n
PRSS1	Q86W17	Protease serine 1	PRSS1	1362.9	1916.03	3038.74	0.711316	1	0.630533	0.125859	0.448508	0.0569146	n
RCOR2	Q8IZ40	REST corepressor 2	RCOR2	76.4612	62.8879	51.2655	1.21583	0.194454	1.22671	0.130195	1.49148	0.010886	d/d
RET4	P02753	Retinol-binding protein 4	RBP4	681.78	546.592	565.933	1.24733	0.0619528	0.965826	0.78302	1.2047	0.189187	n
SAA4	P35542	Serum amyloid A protein	SAA4	201.058	191.879	240.88	1.04784	0.845728	0.796576	0.227521	0.834681	0.450451	n
SAMP	P02743	Serum amyloid P-component	APCS	913.376	949.216	911.677	0.962243	0.831349	1.04118	0.772245	1.00186	0.992276	n
TETN	P05452	Tetranectin	CLEC3B	232.639	284.434	232.234	0.817903	0.341219	1.22477	0.267976	1.00175	0.991704	n
THBG	P05543	Thyroxine-binding globulin	SERPINA7	262.17	260.72	276.574	1.00556	0.964476	0.942681	0.490308	0.947921	0.67007	n
THRB	P00734	Prothrombin	F2	5017.45	4901.98	5126.44	1.02355	0.765198	0.956216	0.549574	0.97874	0.455273	n
TM198	Q66K66	Transmembrane protein 198	TMEM198	1108.95	885.576	852.774	1.25223	0.389232	1.03846	0.880886	1.3004	0.1454	n
TRFE	P02787	Serotransferrin	TF	7917.34	7407.5	8324.05	1.06883	0.851925	0.889891	0.135113	0.95114	0.1454	n
TTHY	P02766	Transthyretin	TTR	9625.97	9748.21	9284.74	0.98746	0.863542	1.04992	0.408719	1.03675	0.654159	n
VTDB	P02774	Vitamin D-binding protein	GC	15189.8	15499.7	16270.9	0.98001	0.478125	0.952601	0.492896	0.933558	0.495035	n
VTNC	P04004	Vitronectin	VTN	7228.39	6528.48	7240.98	1.10721	0.456455	0.901602	0.156004	0.998262	0.331723	n
ZA2G	P25311	Zinc-alpha-2-glycoprotein	AZGP1	3581.68	3429.09	3547.31	1.0445	0.66051	0.966675	0.67773	1.00969	0.765198	n
A2KBC8	A2KBC8	Anti-TeTox scFv (Fragment)		2122.02	2088.34	2044.41	1.01613	0.902986	1.02149	0.877349	1.03796	0.770103	n
A2IPI6	A2IPI6	HRV Fab 027-VL (Fragment)		85.5186	87.05	103.235	0.982408	0.878849	0.843221	0.241872	0.828387	0.115301	n
A0A087WV47	A0A087WV47	Ig gamma-1 chain C region		156437	155747	153100	1.00443	0.955221	1.01729	0.783999	1.02179	0.808383	n
A0A087WYC5	A0A087WYC5	Ig gamma-1 chain C region		173.276	102.268	101.865	1.69433	0.910825	1.00395	0.681322	1.70102	0.601213	n
A0A087WXL8	A0A087WXL8	Ig gamma-3 chain C region		7659.41	7316.65	6977.99	1.04685	0.793839	1.04853	0.692316	1.09765	0.586441	n
IGHG4	P01861	Ig gamma-4 chain C region		2974.91	2371.93	2183.34	1.25422	0.478125	1.08638	0.507086	1.36256	0.793839	n
A0A068LKP9	A0A068LKP9	Ig heavy chain variable region (Fragment)		558.726	638.537	645.98	0.875011	0.239455	0.988477	0.883301	0.864928	0.191334	n
A0A068LKQ0	A0A068LKQ0	Ig heavy chain variable region (Fragment)		1259.77	1095.56	1112.97	1.14989	0.736875	0.984358	0.829099	1.1319	0.525653	n
A0A068LKQ8	A0A068LKQ8	Ig heavy chain variable region (Fragment)		192.816	162.606	151.494	1.18579	0.627446	1.07335	0.520168	1.27276	0.0673546	n
HV209	P06331	Ig heavy chain V-II region ARH-77		206.143	157.078	122.994	1.31236	0.331723	1.27712	0.191334	1.67604	0.0793217	n
HV306	P01767	Ig heavy chain V-III region BUT		175.612	194.27	163.237	0.903959	0.108427	1.19011	0.0421332	1.07581	0.736875	u/d
KV303	P01621	Ig kappa chain V-III region NG9		688.18	597.96	682.218	1.15088	0.463093	0.876495	0.440479	1.00874	0.957319	n
KV402	P01625	Ig kappa chain V-IV region Len		1505.22	1405.88	1492.48	1.07066	0.82276	0.941976	0.178889	1.00854	0.903795	n
LV105	P01703	Ig lambda chain V-I region NEWM		197.335	248.22	237.389	0.795002	0.217249	1.04562	0.844597	0.831272	0.4552	n
LV301	P01714	Ig lambda chain V-III region SH		223.851	254.277	232.784	0.880345	0.534464	1.09233	0.881293	0.961628	0.654159	n
A0A087WYJ9	A0A087WYJ9	Ig mu chain C region		489.562	404.962	498.961	1.20891	0.575486	0.811611	0.143078	0.981164	0.525653	n
A0A087X2C0	A0A087X2C0	Ig mu chain C region		14903.8	12802.5	13232.8	1.16413	0.881293	0.967483	0.682632	1.12627	0.97022	n
Q65ZC9	Q65ZC9	Single-chain Fv (Fragment)		98.5776	112.529	116.904	0.876016	0.460766	0.962581	0.799566	0.843237	0.346083	n
S6BGD6	S6BGD6	IgG L chain		607.596	577.361	506.099	1.05237	0.394747	1.14081	0.206274	1.20055	0.053541	n
Q6P5S8	Q6P5S8	IGK@ protein		618.793	453.625	500.939	1.36411	0.270625	0.905549	0.910825	1.23527	0.462028	n
Q6PIL8	Q6PIL8	IGK@ protein		75085.6	77534.6	73424.3	0.968413	0.696444	1.05598	0.501895	1.02263	0.736875	n
Q5FWF9	Q5FWF9	IGL@ protein		10923.4	9623.99	8692.19	1.13502	0.304087	1.1072	0.351491	1.25669	0.0741159	n
Q8N355	Q8N355	IGL@ protein		12253.5	12467	12454.9	0.982873	0.788029	1.00097	0.987729	0.983827	0.795907	n
Q0ZCH9	Q0ZCH9	Immunglobulin heavy chain variable region (Fragment)		4156.11	3994.66	3686.29	1.04042	0.940481	1.08365	0.582632	1.12745	0.413612	n
Q0ZCI9	Q0ZCI9	Immunglobulin heavy chain variable region (Fragment)		182.472	184.882	190.75	0.986966	0.926849	0.969234	0.81528	0.956601	0.262722	n
Q0KKI6	Q0KKI6	Immunoblobulin light chain (Fragment)		1462.99	1525.21	1527.14	0.959206	0.638397	0.998736	0.989716	0.957993	0.614887	n
Q9NPP6	Q9NPP6	Immunoglobulin heavy chain variant (Fragment)		2134.83	1905.6	1961.22	1.12029	0.298618	0.971641	0.784213	1.08852	0.681322	n
D6RD17	D6RD17	Immunoglobulin J chain (Fragment)		911.624	840.276	843.777	1.08491	0.851925	0.995851	0.971317	1.08041	0.82276	n
A0A087WWC9	A0A087WWC9	Immunoglobulin lambda-like polypeptide 5		2072.23	2048.78	2003.47	1.01145	0.455273	1.02262	0.823024	1.03432	0.753376	n
Q9UL88	Q9UL88	Myosin-reactive immunoglobulin heavy chain variable region (Fragment)		1590.78	1464.86	1378.31	1.08596	0.851925	1.0628	0.583835	1.15416	0.793839	n
Q9UL90	Q9UL90	Myosin-reactive immunoglobulin heavy chain variable region (Fragment)		180.681	162.113	166.83	1.11454	0.736875	0.971727	0.736875	1.08303	0.586144	n
Q9UL85	Q9UL85	Myosin-reactive immunoglobulin kappa chain variable region (Fragment)		605.822	481.975	561.402	1.25696	0.299203	0.858521	0.191334	1.07912	0.575486	n
Q9UL78	Q9UL78	Myosin-reactive immunoglobulin light chain variable region (Fragment)		3645.07	3150.95	3125.62	1.15681	0.345564	1.0081	0.933407	1.16619	0.654159	n
A0A087WU91	A0A087WU91	Protein IGHV3-49		224.382	175.503	182.767	1.2785	0.765198	0.960255	0.689301	1.22769	0.851925	n
A0A087WZH9	A0A087WZH9	Protein IGKV1-33		506.784	485.692	465.666	1.04342	0.626043	1.04301	0.910825	1.0883	0.525653	n
A0A087X1V9	A0A087X1V9	Protein IGKV2-28		314.058	176.985	194.924	1.77448	0.135357	0.907972	0.42082	1.61118	0.501591	n
A0A075B6R9	A0A075B6R9	Protein IGKV2D-24		267.62	291.567	271.473	0.917868	0.365604	1.07402	0.601213	0.985806	0.627446	n
A0A087WZW8	A0A087WZW8	Protein IGKV3-11		383.156	358.195	369.938	1.06969	0.82276	0.968254	0.685832	1.03573	0.433048	n
P01598	P01598	Ig kappa chain V-I region EU		6039.67	6228.6	6853.53	0.969668	0.262722	0.908815	0.157201	0.881249	0.0281687	n/u
A0N5G5	A0N5G5	Rheumatoid factor D5 light chain (Fragment)		909.714	944.236	855.582	0.963439	0.61506	1.10362	0.219751	1.06327	0.504041	n
A2J1M8	A2J1M8	Rheumatoid factor RF-IP12 (Rheumatoid factor RF-IP13) (Fragment)		194.549	178.951	177.849	1.08716	0.940481	1.0062	0.977145	1.0939	0.433048	n
A2J1N0	A2J1N0	Rheumatoid factor RF-IP14 (Fragment)		202.554	213.03	205.439	0.950823	0.807953	1.03695	0.550292	0.985959	0.601213	n
A2J1M2	A2J1M2	Rheumatoid factor RF-IP9 (Fragment)		277.663	324.697	333.441	0.855143	0.20313	0.973778	0.478125	0.832719	0.0862055	n
A2MYD4	A2MYD4	V2-7 protein (Fragment)		507.6	502.673	522.104	1.0098	0.411465	0.962783	0.575486	0.97222	0.792928	n
